# Supplementary material for: Polymer-supported manganese-catalysed transformation of esters and aldehydes to alcohols
Source: Royal Society of Chemistry journal article supplement (doi:10.1039/d5cy01174d), 2025-12-05

## Electronic Supporting Information

### **Polymer-supported Manganese-Catalysed Transformation of Esters and Aldehydes to Alcohols: Catalyst Priming leads to a more active and viable recyclable catalyst system**

V. Kishore Kumar Pampana,<sup>a</sup> Si Lok Ko,<sup>a</sup> Eimear Courtney,<sup>a</sup> Benjamin R. O'Donoghue,<sup>a</sup> David J. Jones,<sup>a</sup> Simon K. Beaumont,<sup>b</sup> Davinder Singh,<sup>c</sup> Charlotte Willans,<sup>d</sup> Ian J. S. Fairlamb,<sup>\*d</sup> Jason M. Lynam,<sup>\*d</sup> Gerard P McGlacken<sup>\*a</sup>

<sup>a</sup>School of Chemistry, Analytical and Biological Chemistry Research Facility (ABCRF), University College Cork, T12 YN60, Ireland. E-mail: [g.mcglacken@ucc.ie](mailto:g.mcglacken@ucc.ie).

<sup>b</sup>Department of Chemistry, Durham University, South Road, Durham, DH1 3LE, UK.

<sup>c</sup>Tyndall National Institute, Cork T12 R5CP, Ireland

<sup>d</sup>Department of Chemistry, University of York, Heslington, York, YO10 5DD, UK. E-mail: [ian.fairlamb@york.ac.uk](mailto:ian.fairlamb@york.ac.uk), [jason.lynam@york.ac.uk](mailto:jason.lynam@york.ac.uk).

### **Table of Contents**

|                                                                                                                             |     |
|-----------------------------------------------------------------------------------------------------------------------------|-----|
| 1. General Methods .....                                                                                                    | S2  |
| 1.1. General Information .....                                                                                              | S2  |
| 1.2. General procedure for the synthesis of Triphenyl Phosphine bound polymer supported Manganese catalyst PS-TPP-[Mn]..... | S3  |
| 1.3. Determination of catalyst loading by ICP-OES.....                                                                      | S5  |
| 1.4. General procedure for the transformation of Esters and Aldehydes using Supported Manganese catalyst.....               | S5  |
| 1.5. General procedure for the reduction of amides using Supported Manganese catalyst.....                                  | S5  |
| 1.6. Recyclability of the Heterogeneous Mn catalyst.....                                                                    | S5  |
| 1.7. Hot Filtration test.....                                                                                               | S6  |
| 1.8. Solid state <sup>31</sup> P NMR analysis.....                                                                          | S6  |
| 1.9. SEM-EDX mapping analysis.....                                                                                          | S8  |
| 1.10. XAFS Spectra.....                                                                                                     | S10 |
| 2. Analytical Data .....                                                                                                    | S12 |
| 3. References.....                                                                                                          | S19 |
| 4. Copies of NMR Spectra .....                                                                                              | S20 |

## 1. General Methods

### 1.1 General Information

All chemicals, reagents, and solvents for the synthesis of the compounds were an analytical grade, purchased from commercial sources (Sigma Aldrich, FluoroChem, Alfa Aesar, Tokyo Chemical Industry) and used without further purification unless otherwise specified. Wet flash column chromatography was carried out using Kieselgel silica gel 60, 0.040–0.063  $\mu\text{m}$  (Merck). Thin-layer chromatography (TLC) was carried out on pre-coated silica gel plates (Merck 60 PF254). Visualisation of the developed plates was achieved under UV light. Infrared (IR) analysis was performed on solid samples using a PerkinElmer Spectrum Two ATR-FTIR spectrometer. All the solution phase Nuclear magnetic resonance (NMR) spectra were run in DMSO- $d_6$  and  $\text{CDCl}_3$  using tetramethylsilane (TMS) as the internal standard at 20  $^\circ\text{C}$  unless otherwise stated.  $^1\text{H}$  NMR (500 MHz), and  $^1\text{H}$  NMR (300 MHz) spectra were recorded on a Bruker Advance 500, and Bruker Advance 300 NMR spectrometers respectively.  $^{13}\text{C}$  NMR (126 MHz), and  $^{13}\text{C}$  NMR (75 MHz) spectra were recorded on Bruker Advance 500, and Bruker Avance 300 NMR spectrometers respectively in proton decoupled mode. All  $^1\text{H}$ ,  $^{13}\text{C}$  and  $^{19}\text{F}$  spectra were recorded at University College Cork. Chemical shifts  $\delta\text{H}$  and  $\delta\text{C}$  are expressed as parts per million (ppm), positive shift being downfield from TMS ( $\delta\text{H} = 0$  ppm); coupling constants (J) are expressed in hertz (Hz). Splitting patterns in  $^1\text{H}$  NMR spectra are designated as singlet (s), broad singlet (bs), broad doublet (bd), broad triplet (bt) doublet (d), doublet of doublets (dd), doublet of doublet of doublets (ddd), doublet of doublet of triplets (ddt), doublet of triplets (dt), doublet of quartets (dq), triplet (t), triplet of doublets (td), quartet (q) and multiplet (m). Solid state  $^{31}\text{P}$  NMR analysis was recorded at Trinity College Dublin. ICP-OES Analysis was completed at the University of York with an Agilent ICP-OES 5800 VDV spectrometer. Samples were aliquoted into acid-leached teflon digestion tubes and accurately weighed (0.30 - 22.9 mg). HCl (1.35 mL, 37%, certified AR grade, supplied by Fisher Chemical™) and  $\text{HNO}_3$  (3.85 mL, 70%, certified AR grade, supplied by Fisher Chemical™) were added. Samples were digested in an Anton-Paar Multiwave Go Plus with microwave irradiation, ramp rate 18  $^\circ\text{C min}^{-1}$ , ultimate temperature 180  $^\circ\text{C}$ , dwell time 15 minutes. Samples allowed to cool and diluted to 50 mL total volume with ultrapure water (Milli-Q type 1 ultrapure water system supplied by Merck). Samples were allowed to stand for 72 hours and carefully decanted to remove undissolved solid. Working standard solutions were prepared from commercial reference standard CCS-6 supplied by inorganic ventures, traceable to NIST certified reference materials. All working standards were matrix matched to the digestion media. Mn analysis was completed at 259.372 nm, with internal standard Y 371.029 nm. Measurements were made in axial configuration, plasma flow 12.0  $\text{L min}^{-1}$ , auxiliary flow 1.00  $\text{L min}^{-1}$ , RF power 1.20 kW. For imaging analysis Tescan Solaris FESEM was used. Low beam current was used to minimize charging effect. Elemental analysis and mapping of sphere samples was done using attached Oxford ULTIM Max EDX detector.

Ex situ X-ray absorption fine structure (XAFS) spectroscopy measurements were performed in transmission mode at the Durham University XAFS facility using a EasyXAFS300+ using the (4,4,0) reflection of a Si (1,1,0) spherically bent crystal analyser (SBCA), a 1200 W proto-X-ray tube with an Mo anode. The power of the X-ray source was set to maintain a collection deadtime on the silicon drift detector of <30 %. Samples were prepared for Mn K-edge XAFS measurements by adding 15 - 40 mg of each catalyst and 50-70 mg of polyethylene glycol binder and grinding in an agate mortar and pestle until homogenous (masses targeting optimal transmission edge jumps versus total absorption, or determined by material available for recycle experiments). Pellets were produced from the resulting mixture by transfer to a 1.0 cm diameter die and applying up to 2 tonnes of pressure for 60 s using a Specac hydraulic press. Spectra were obtained around the step edge from 6524 to 6589 eV with 0.25 eV steps and 5.6 s dwell time, and at lower resolution above and below the edge for normalisation. Four spectra were acquired for each sample, checked for consistency and normalised. Energy calibration was carried out by scanning a Mn foil using the same acquisition parameters and correcting to the maximum of the first derivative at 6539 eV. Transmission spectra were obtained using a separately recorded background ( $I_0$ ) scan. Data collected from the instrument was background corrected using the python based EasyXAFS software (easyXAFS, WA). Processing of XAFS data produced was performed using IFEFFIT with the demeter package using Athena for normalisation,<sup>1</sup> plotting and edge position determination. Edge position of samples was taken to be 50% of the normalised step edge height to avoid possible interference of pre-edge features in determination by other methods.

## 1.2 General procedure for the synthesis of Triphenyl Phosphine bound polymer supported Manganese catalyst PS-TPP-[Mn]

In an oven dried pressure tube, add 10 mL of anhydrous DCE to Triphenylphosphine, polymer-bound (100-200 mesh, extent of labeling:  $\sim 1.6$  mmol  $\text{g}^{-1}$  loading) **PS-TPP** (419 mg, 0.67 mmol of  $\text{PPh}_3$  approximately based on supplier's loading) and homogeneous manganese bromo pentacarbonyl **MnBr(CO)<sub>5</sub>** (548mg, 2.0 mmol) and stirred at 85 °C in an oil bath for 16h. Filter the solid in Hirsh funnel using a filter paper and wash the solid with DCM and MeOH (remove the excess unreacted homogeneous Mn catalyst) and later dried under vacuum, results in an Yellowish orange solid PS-TPP-[Mn] (575 mg).

PS-TPP-[Mn] can be primed by treating with 10% NaOH and MeOH solution overnight at room temperature to enhance the activity, exclusively for selective reduction of esters and aldehydes, which resulted in producing enhanced yields of the desired reduction products.

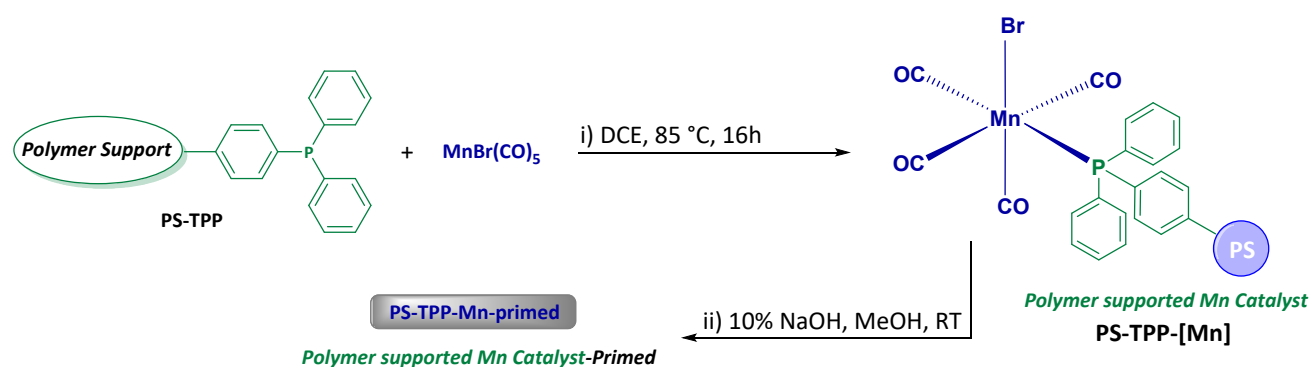

**Scheme S1.** General procedure for the synthesis of Heterogeneous Mn catalyst

### 1.3 Determination of catalyst loading by ICP-OES

The mol% catalyst loading was determined for the reactions using the processed ICP result that the polymer-supported catalyst contained 7 wt.% Mn as follows:

$$\text{Mol\% loading in reaction} = \frac{\text{moles Mn}}{\text{moles substrate}} \times 100\%$$

$$\text{Mol\% loading in reaction} = \left( \frac{\text{Mn wt. \% in catalyst} \times \text{mass of catalyst in reaction} \div \text{Mr (Mn)}}{\text{moles of substrate in reaction}} \right) \times 100\%$$

$$\text{Mol\% loading in reaction} = \left( \frac{\left( \frac{7.0}{100} \right) \times 20 \text{ mg} \div 54.938 \text{ mg mmol}^{-1}}{0.5 \text{ mmol}} \right) \times 100\% = 5.1 \%$$

| S.No | Catalyst                     | Mn in mol% |
|------|------------------------------|------------|
| 1    | Fresh PS-TPP-[Mn]            | 5.1%       |
| 2    | PS-TPP-[Mn]-used once        | 4.2 %      |
| 3    | PS-TPP-[Mn]-used twice       | 3.9%       |
| 4    | Fresh PS-TPP-[Mn]-Primed     | 5.1%       |
| 5    | PS-TPP-[Mn]-Primed used once | 4.7%       |

### 1.4 General procedure for the transformation of Esters and Aldehydes using Supported Manganese catalyst

Esters or aldehydes (0.5 mmol), Phenyl silane (2.0-3.0 equiv.), and Triphenyl Phosphine Polymer-supported Mn catalyst PS-TPP-[Mn] (20 mg, 5.1 mol%) were transferred into a dry test tube fitted with a screw cap and a magnetic stir bar. The reaction mixture was then heated at 100 °C in an oil bath for 7 to 8h. Thereafter, the reaction mixture was cooled down to r.t. and MeOH (3 mL) and 10 % aq. NaOH solution (2 mL) was added

slowly. The resulting mixture was stirred overnight for complete hydrolysis. Organic compounds were extracted from the mixture with  $\text{CH}_2\text{Cl}_2$  (3 x 12 mL). The organic fraction was dried over  $\text{Na}_2\text{SO}_4$  and all volatiles were removed using rotary evaporator. Crude product was purified by column chromatography using silica as stationary phase and a mixture of hexanes and ethyl acetates as eluents to afford respective alcohols as products in good to excellent yields.

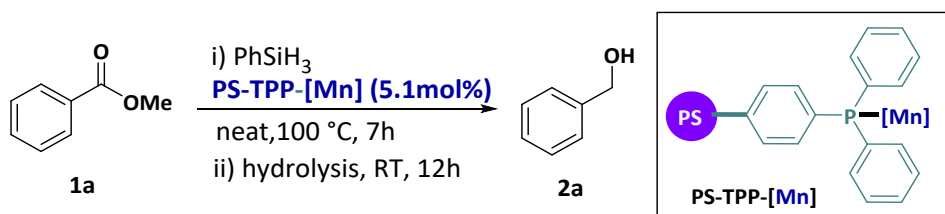

**Scheme S2.** General procedure for selective reduction of esters and aldehydes to alcohols

### 1.5 General procedure for the reduction of amides using Supported Manganese catalyst

A dry test tube fitted with a screw cap containing a stir bar was charged with the morpholino(phenyl)methanone **3** (0.5 mmol) and  $\text{PS-TPP-[Mn]}$  (20 mg, 5.1 mol%) and Phenyl silane (2.0 equiv.) were added sequentially. The mixture was stirred under air at  $80^\circ\text{C}$  for 3 h. The cooled reaction mixture was then filtered and separated from heterogeneous Mn catalyst using MeOH. Separated reaction mixture was then concentrated under reduced pressure and then purified by filtering through silica gel column chromatography affording reduced amine **4** in excellent yield.

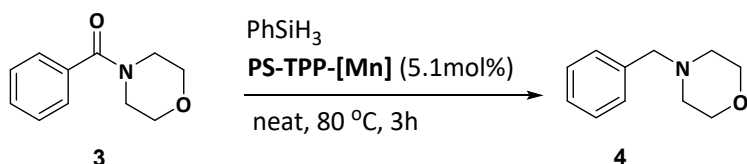

### 1.6 Recyclability of the Heterogeneous Mn catalyst

**1a** (2.0 mmol), Phenyl silane (4.0 mmol, 2.0 equiv.),  $\text{PS-TPP-[Mn]}$  (80mg, 5.1 mol%) stirred in an oven dried Schlenk tube under neat conditions at  $100^\circ\text{C}$  in an oil bath. After 24h, reaction was cooled down to RT and added 10% NaOH (6 mL) and MeOH (10 mL) and stirred at RT for complete hydrolysis. After 24h, add MeOH (5-10 mL) allows the Heterogeneous Mn catalyst to settle down at the bottom of the reaction tube. Decant the reaction mixture in to a separating funnel and extract the organic layer with DCM as mentioned in general procedure **1.3** and isolate the desired product **2a** using column chromatography. Recycle the heterogeneous catalyst by using a Hirsch funnel. Wash it with methanol and DCM to remove any remaining organic material, then dry it for use in the next run. Repeat the same procedure (2<sup>nd</sup> to 4<sup>th</sup> run) using recycled catalyst at the end of each run.

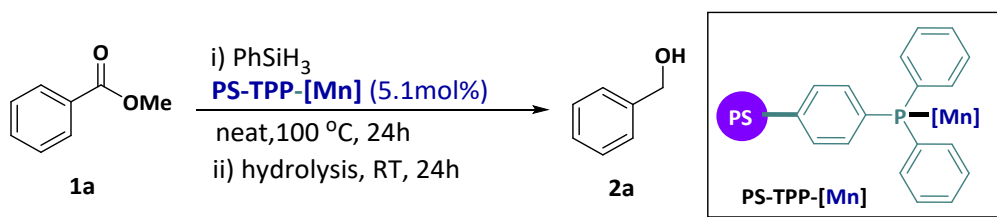

## 1.7 Hot filtration test

GP 1.4 was followed using methyl benzoate **1a** (0.5 mmol), Phenyl silane (2.0 equiv.), and PS-TPP-[Mn] (20 mg, 5.1 mol%) were transferred in to a dry test tube fitted with a screw cap and a magnetic stir bar. The reaction mixture was then heated at 100 °C in an oil bath. After 2 hours, PS-TPP-[Mn] was carefully filtered over celite and the filtrate was directly transferred in to another dry test tube fitted with a screwcap. This was directly transferred to pre-heated oil-bath and the reaction continued for 6 h. Thereafter, the reaction mixture was cooled down to r.t. and MeOH (3 mL) and 10 % aq. NaOH solution (2 mL) was added slowly. The resulting mixture was stirred overnight at for complete hydrolysis. Organic compounds were extracted from the mixture with CH<sub>2</sub>Cl<sub>2</sub> (3 x 12 mL). The combined organic layers were dried over Na<sub>2</sub>SO<sub>4</sub>, filtered, and concentrated in vacuo which afforded the alcohol **2a** in 6% confirming the heterogeneity of the synthesised Mn heterogeneous catalyst.

## 1.8 Solid state <sup>31</sup>P NMR analysis

SS <sup>31</sup>P NMR of MnBrCO<sub>4</sub>(PPh<sub>3</sub>) homogeneous complex

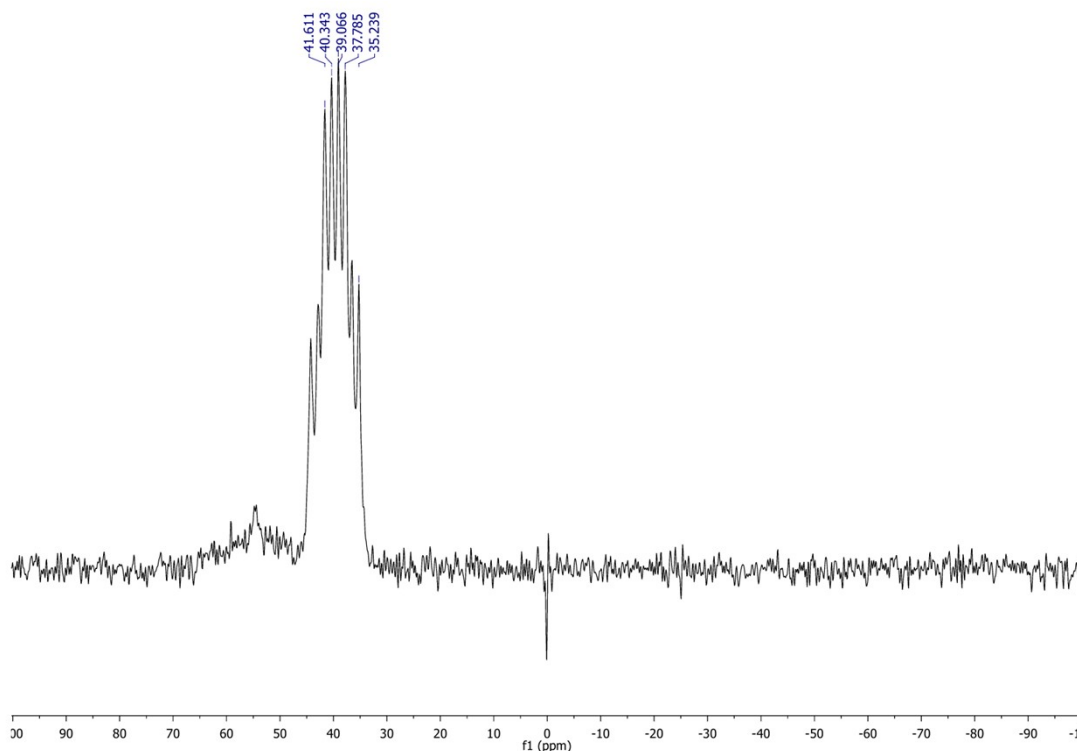

SS  $^{31}\text{P}$  NMR of Free polymer supported phosphine ligand (PS-TPP)

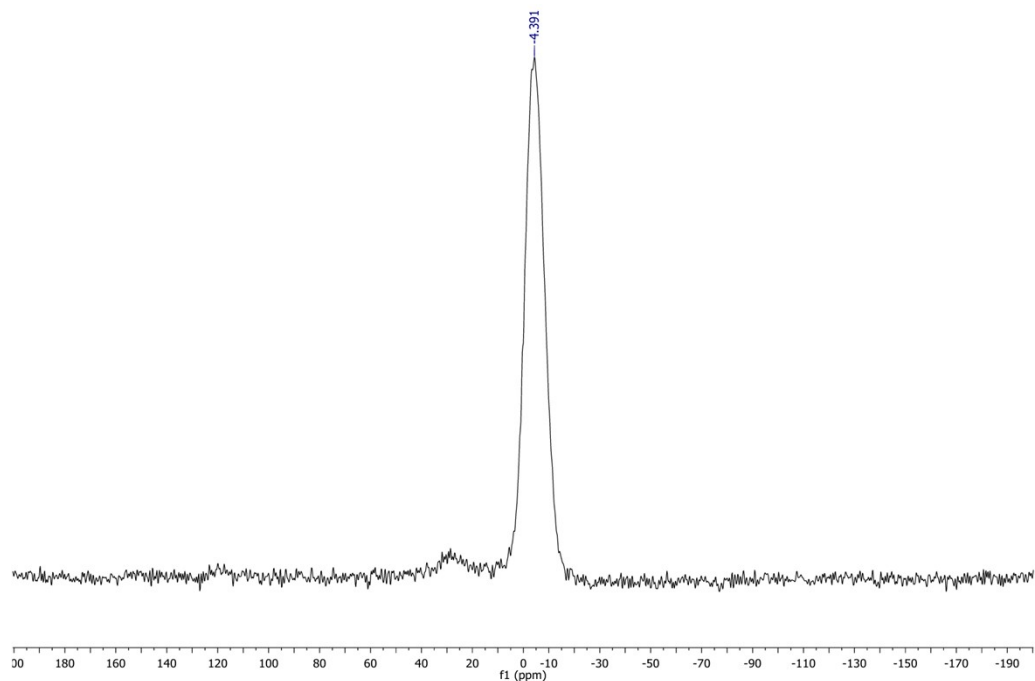

SS  $^{31}\text{P}$  NMR of polymer supported Mn catalyst PS-TPP-[Mn]

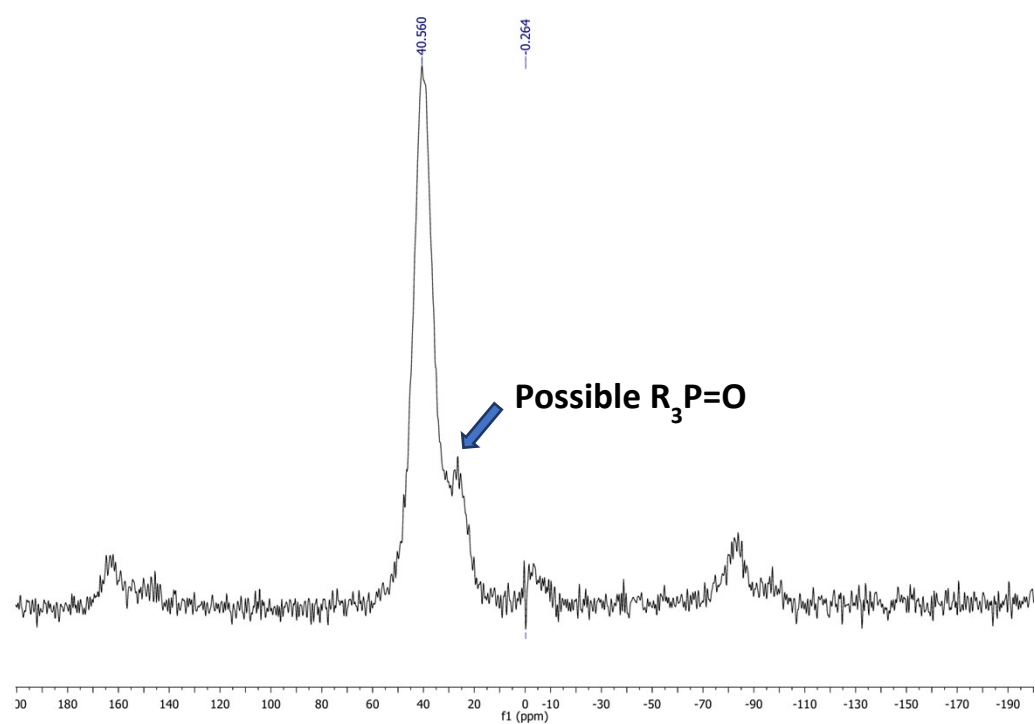

## 1.9 SEM-EDX mapping analysis

a) EDX mapping analysis of **unused** PS-TPP-[Mn]

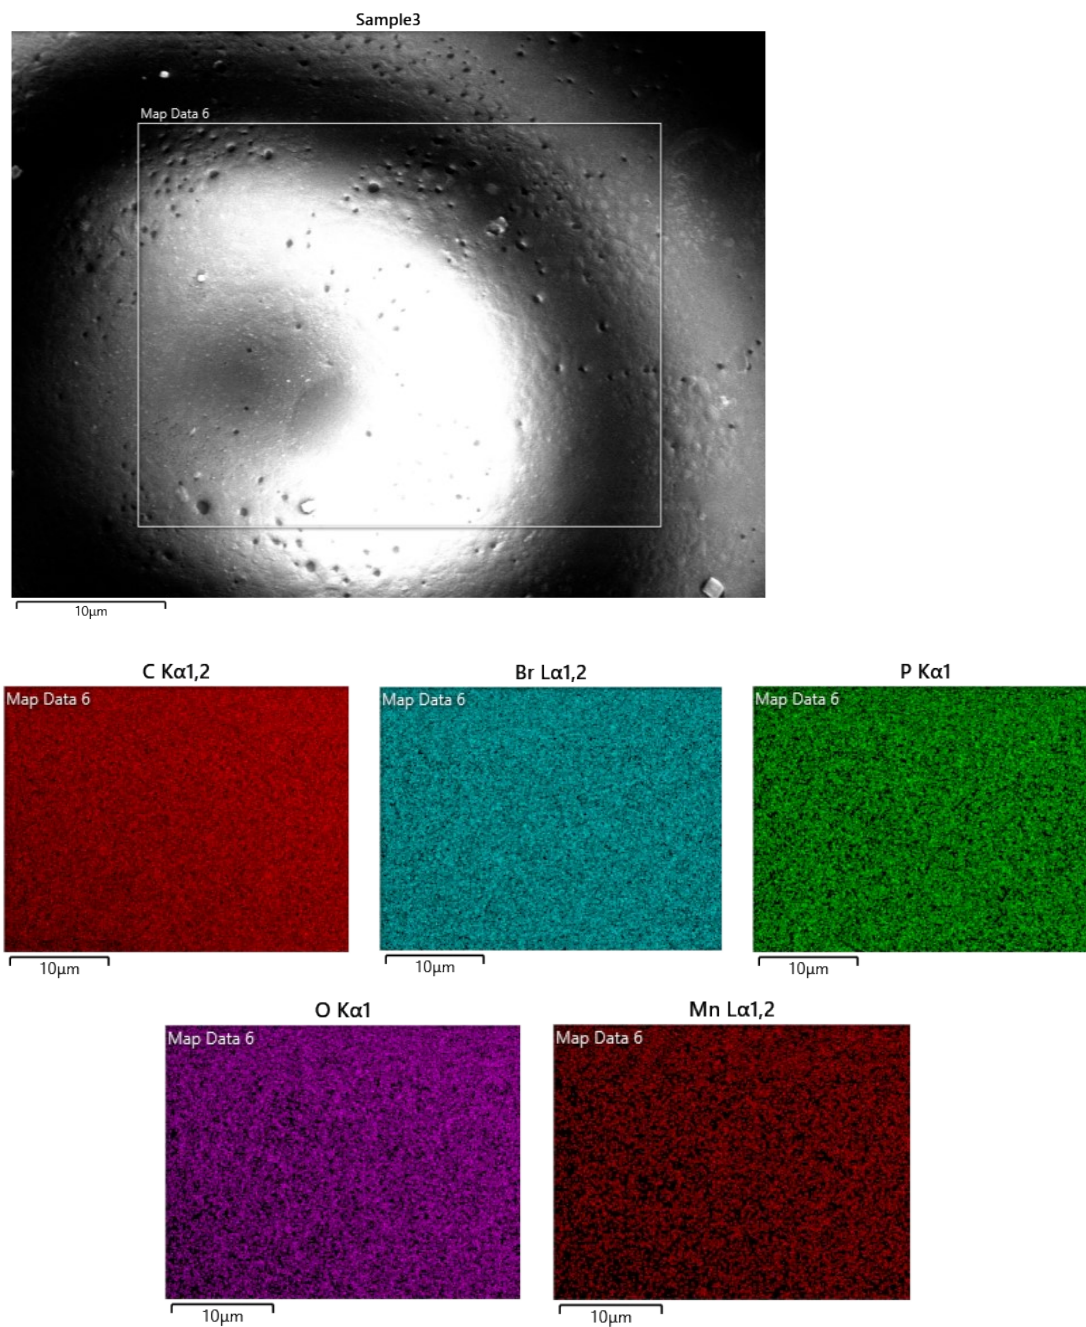



b) EDX mapping analysis of PS-TPP-[Mn]-Primed

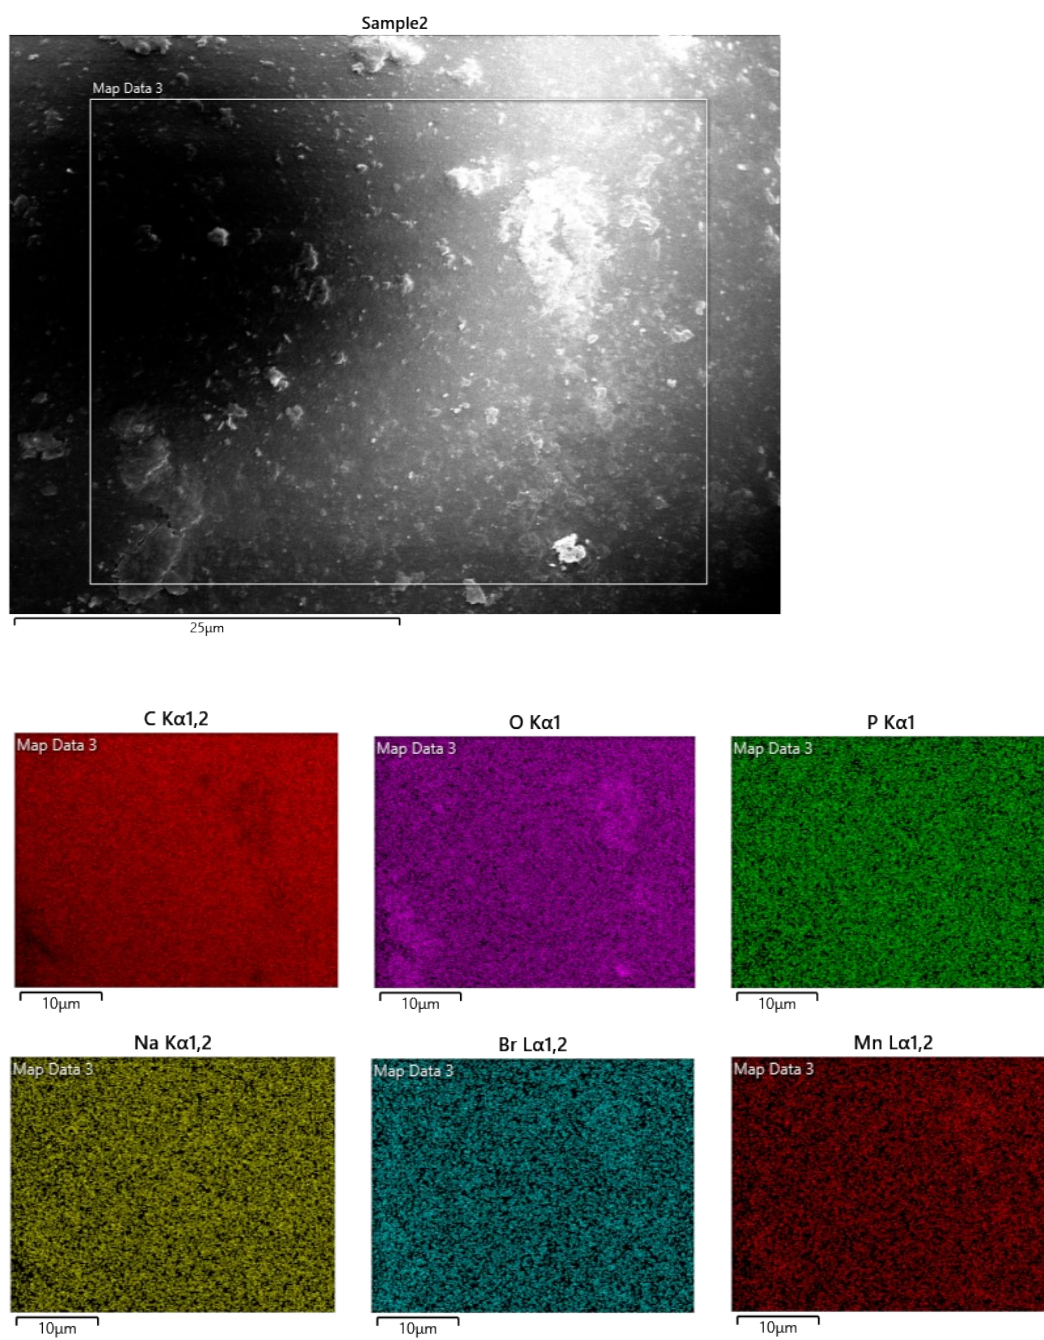

c) EDX mapping analysis of PS-TPP-[Mn]-recycled

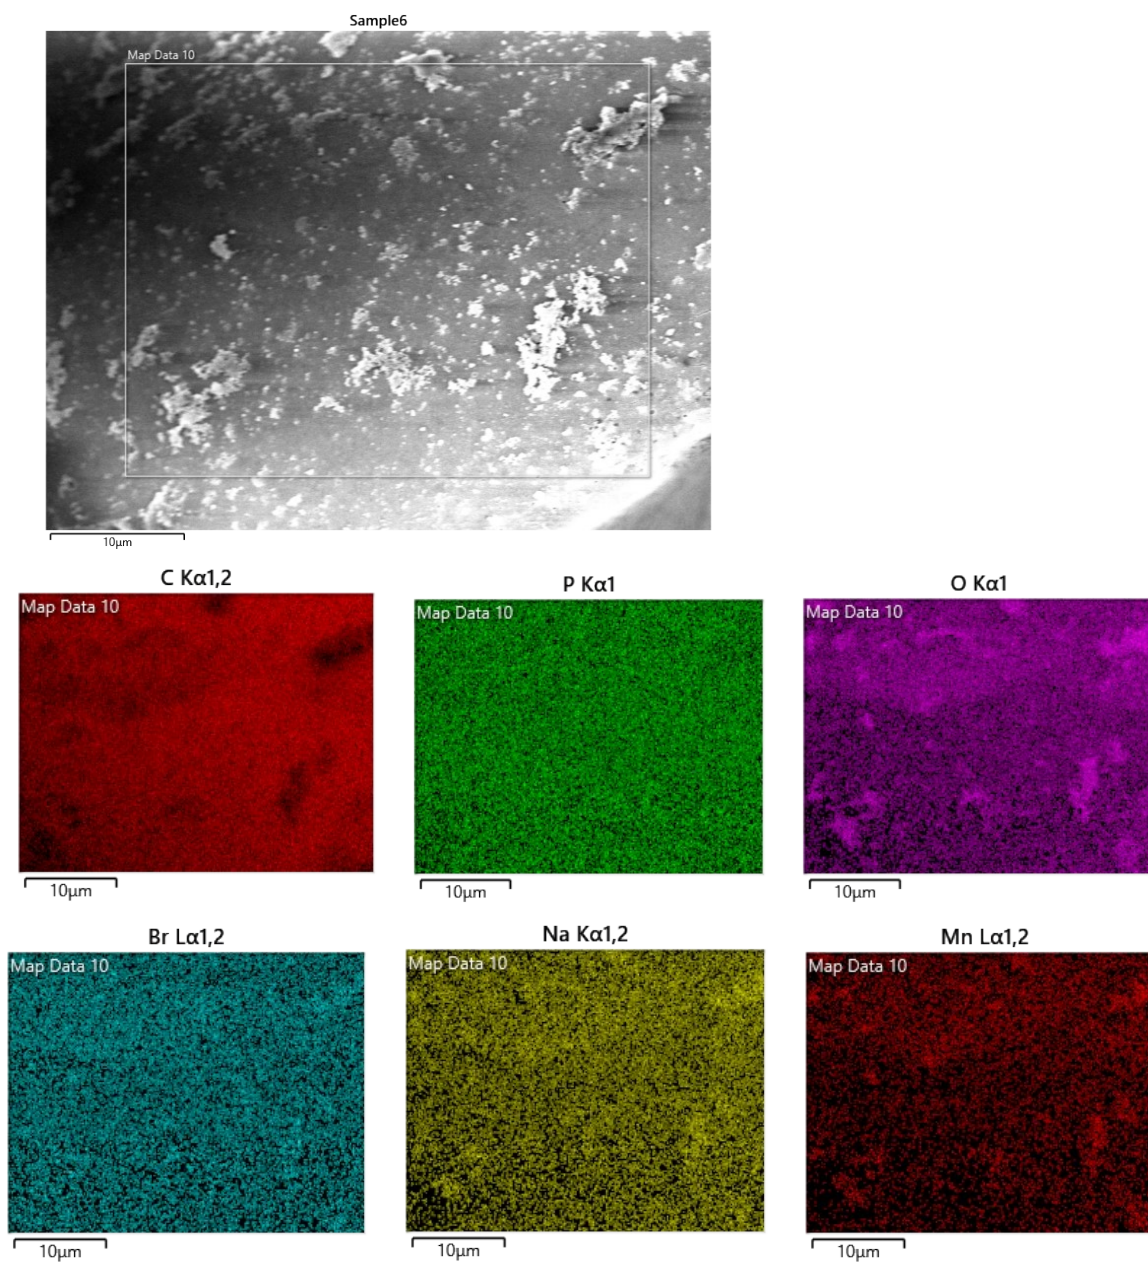

### 1.10 XAFS spectra

a) Normalised Mn K-edge XANES spectra for series of PS-TPP-[Mn] samples. Spectra are energy corrected based on the energy of a separately acquired Mn foil spectrum and offset vertically for clarity. The energy position of Mn foil is marked for comparison. There is a noticeable change in shape, pre-edge feature and white line position, in addition to the changes in edge position documented in the main text – this occurs in the groupings “Fresh catalysts,” “Primed and/or reused 1-2 times” and “reused 4 times,” which contain similar spectral shapes in each case, again pointing to changes in catalyst structure.

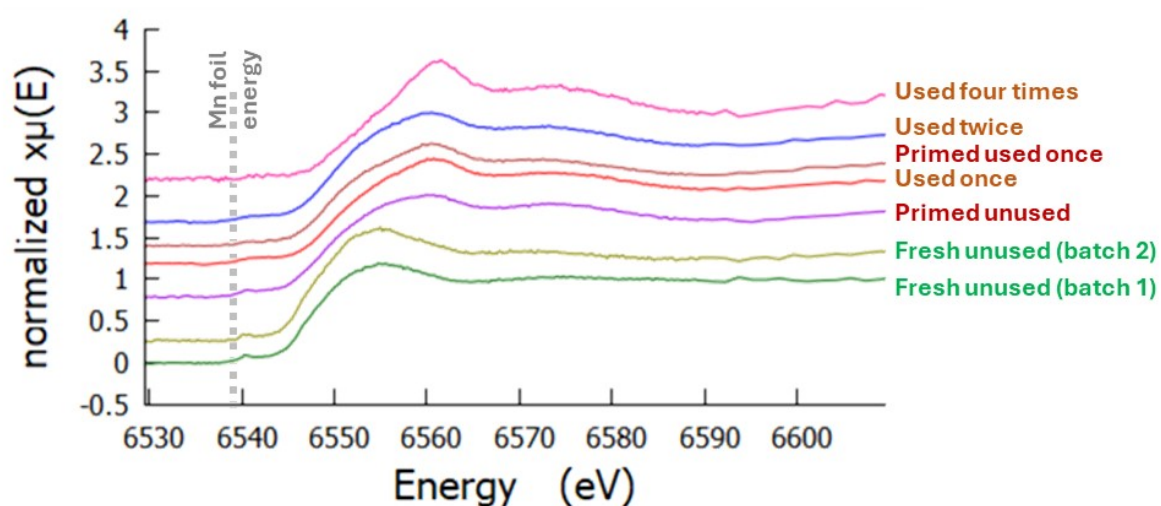

b) Normalised Mn K-edge XANES spectra for reference compounds  $\text{MnBr}(\text{CO})_4\text{PPh}_3$  and  $\text{MnBr}(\text{CO})_5$ . Spectra are energy corrected based on the energy of a separately acquired Mn foil spectrum and offset vertically for clarity. The energy position of Mn foil is marked for comparison.

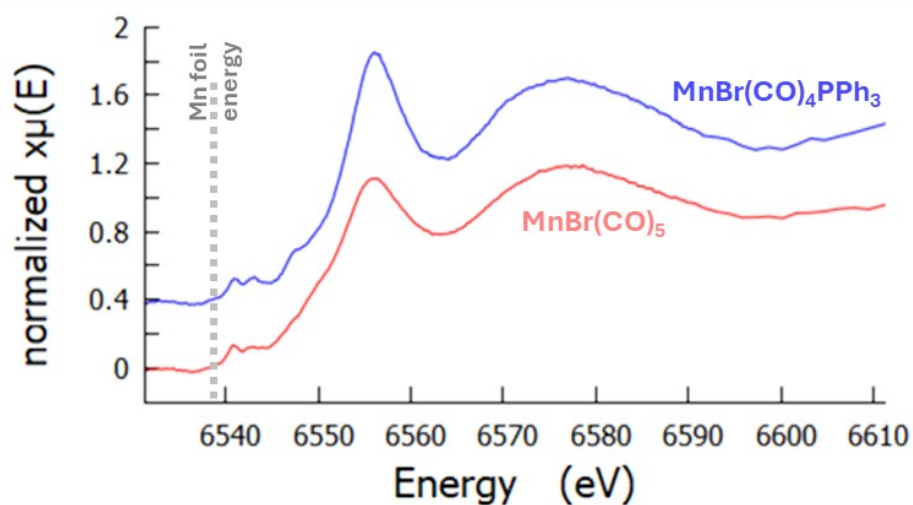

## 2. Analytical Data

### Phenylmethanol, **2a**<sup>2a</sup>

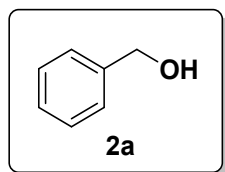

Compound **2a** was prepared according to the general procedure **1.4.** using **methyl benzoate (1a)**. The crude compound was purified by silica gel column chromatography (3:2, hexane:EA) to give the title compound **2a** as a colourless liquid (41 mg, 76%). The NMR data is in accordance with the literature.<sup>2a</sup>

Compound **2a** was also prepared according to the general procedure **1.4.** using **Ethyl benzoate (1b)**. The crude compound was purified by silica gel column chromatography (3:2, hexane:EA) to give the title compound **2a** as a colourless liquid (10 mg, 18%).

Compound **2a** was prepared according to the general procedure **1.4.** using **benzaldehyde (1n)**. The crude compound was purified by silica gel column chromatography (3:2, hexane:EA) to give the title compound **2a** as a colourless liquid (43 mg, 80%).

Compound **2a** was prepared according to the general procedure **1.4.** using **benzaldehyde (1n)** using **primed PS-TPP-[Mn] catalyst**. The crude compound was purified by silica gel column chromatography (3:2, hexane:EA) to give the title compound **2a** as a colourless liquid (45 mg, 85%).

Compound **2a** was prepared according to the general procedure **1.4.** using **methyl benzoate (1a)** using **primed PS-TPP-[Mn] catalyst**. The crude compound was purified by silica gel column chromatography (3:2, hexane:EA) to give the title compound **2a** as a colourless liquid (44 mg, 80%).

<sup>1</sup>H NMR (300 MHz, CDCl<sub>3</sub>) δ 7.40 – 7.27 (m, 5H), 4.71 (s, 2H).

<sup>13</sup>C NMR (75 MHz, CDCl<sub>3</sub>) δ 140.9, 128.5, 127.6, 127.0, 65.2.

### *p*-tolylmethanol, **2c**<sup>2a</sup>

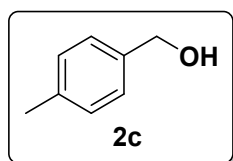

Compound **2c** was prepared according to the general procedure **1.4.** using **methyl 4-methylbenzoate (1c)**. The crude compound was purified by silica gel column chromatography (3:2, hexane:EA) to give the title compound **2c** as a colourless liquid (42 mg, 69%). The NMR data is in accordance with the literature.<sup>2</sup>

Compound **2c** was also prepared according to the general procedure **1.4.** using **methyl 4-Ethylbenzoate (1d)**. The crude compound was purified by silica gel column chromatography (3:2, hexane:EA) to give the title compound **2c** as a colourless liquid (24 mg, 40%).

Compound **2c** was also prepared according to the general procedure **1.4.** using **4-methyl benzaldehyde (1s)** using **primed PS-TPP-[Mn] catalyst**. The crude compound was purified by silica gel column chromatography (3:2, hexane:EA) to give the title compound **2c** as a colourless liquid (57 mg, 93%).

<sup>1</sup>H NMR (500 MHz, CDCl<sub>3</sub>) δ 7.26 (d, J = 7.5 Hz, 2H), 7.17 (d, J = 8.0 Hz, 2H), 4.64 (s, 2H), 2.35 (s, 3H).

**<sup>13</sup>C NMR** (126 MHz, CDCl<sub>3</sub>) δ 137.9, 137.4, 129.2, 127.1, 65.3, 21.1.

**(4-methoxyphenyl)methanol, 2e<sup>2b</sup>**

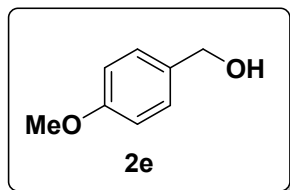

Compound **2e** was prepared according to the general procedure **1.4.** using **4-methoxybenzaldehyde (1t)** using **primed PS-TPP-[Mn] catalyst**. The crude compound was purified by silica gel column chromatography (3:2, hexane:EA) to give the title compound **2e** as a colourless liquid (66 mg, 96%), whereas the same substrate using unprimed catalyst afforded **2e** as a colourless liquid (55 mg, 83%). The NMR data is in accordance with the literature.<sup>2b</sup>

Compound **2e** was prepared according to the general procedure **1.4.** using **4-methoxybenzyl acetate (1e)**. The crude compound was purified by silica gel column chromatography (3:2, hexane:EA) to give the title compound **2e** as a colourless liquid (37 mg, 53%).

Compound **2e** was prepared according to the general procedure **1.4.** using **methyl 4-methoxybenzoate (1x)** using **primed PS-TPP-[Mn] catalyst**. The crude compound was purified by silica gel column chromatography (3:2, hexane:EA) to give the title compound **2e** as a colourless liquid (55 mg, 82%), whereas the same substrate using unprimed catalyst afforded **2e** as a colourless liquid (53 mg, 77%).

**<sup>1</sup>H NMR** (300 MHz, CDCl<sub>3</sub>) δ 7.19 (d, J = 8.6 Hz, 1H), 6.82 (d, J = 8.7 Hz, 1H), 4.47 (s, 2H), 3.73 (s, 3H), 2.93 (bs, 1H).

**<sup>13</sup>C NMR** (75 MHz, CDCl<sub>3</sub>) δ 159.2, 133.1, 128.6, 113.9, 64.9, 55.3.

**(3,5-dimethoxyphenyl)methanol, 2f<sup>2c</sup>**

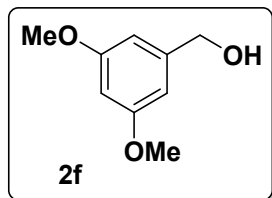

Compound **2f** was prepared according to the general procedure **1.4.** using **methyl 3,5-dimethoxybenzoate (1f)**. The crude compound was purified by silica gel column chromatography (3:2, hexane:EA) to give the title compound **2f** as a colourless liquid (74 mg, 89%). The NMR data is in accordance with the literature.<sup>2c</sup>

Compound **2f** was prepared according to the general procedure **1.4.** using **methyl 3,5-dimethoxybenzaldehyde (1u)**. The crude compound was purified by silica gel column chromatography (3:2, hexane:EA) to give the title compound **2f** as a colourless liquid (83 mg, 98%).

**<sup>1</sup>H NMR** (500 MHz, CDCl<sub>3</sub>) δ 6.53 (d, J = 2.3 Hz, 2H), 6.39 (t, J = 2.3 Hz, 1H), 4.64 (s, 2H), 3.80 (s, 6H).

**<sup>13</sup>C NMR** (126 MHz, CDCl<sub>3</sub>) δ 161.0, 143.3, 104.5, 99.7, 65.3, 55.3.



**(4-(trifluoromethyl)phenyl)methanol, 2g<sup>2a</sup>**

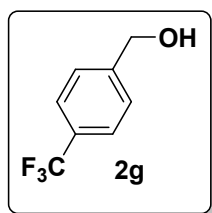

Compound **2g** was prepared according to the general procedure **1.4.** using **4-(trifluoromethyl)benzaldehyde (1h)**. The crude compound was purified by silica gel column chromatography (3:2, hexane:EA) to give the title compound **2g** as a colourless liquid (26 mg, 30%). The NMR data is in accordance with the literature.<sup>2a</sup>

Compound **2g** was also prepared according to the general procedure **1.4.** using **methyl 4-(trifluoromethyl)benzoate (1g)**. The crude compound was purified by silica gel column chromatography (3:2, hexane:EA) to give the title compound **2g** as a colourless liquid (66 mg, 76%).

**<sup>1</sup>H NMR** (300 MHz, CDCl<sub>3</sub>) δ 7.62 (d, J = 8.1 Hz, 2H), 7.50 – 7.45 (m, 2H), 4.77 (s, 2H).

**<sup>13</sup>C NMR** (75 MHz, CDCl<sub>3</sub>) δ 144.7(s), 129.8 (q, J = 32.6 Hz), 126.8 (s), 125.4 (q, J = 3.7 Hz), 124.2 (q, J = 271.5 Hz), 64.4(s).

**<sup>19</sup>F NMR** (282 MHz, CDCl<sub>3</sub>): δ -62.5.

**(3-chlorophenyl) methanol, 2i<sup>3</sup>**

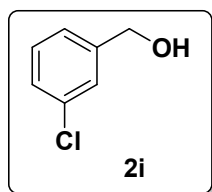

Compound **2h** was prepared according to the general procedure **1.4.** using **methyl 4-chlorobenzoate (1i)**. The crude compound was purified by silica gel column chromatography (3:2, hexane:EA) to give the title compound **2i** as a colourless liquid (45 mg, 63%). The NMR data is in accordance with the literature.<sup>3</sup>

**<sup>1</sup>H NMR** (300 MHz, CDCl<sub>3</sub>) δ 7.33 (s, 1H), 7.24 – 7.20 (m, 3H), 4.63 (s, 2H).

**<sup>13</sup>C NMR** (75 MHz, CDCl<sub>3</sub>) δ 142.8, 134.4, 129.8, 127.6, 126.9, 124.8, 64.4.

**(4-bromophenyl) methanol, 2j<sup>2a</sup>**

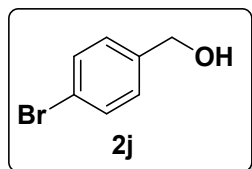

Compound **2j** was prepared according to the general procedure **1.4.** using **methyl 4-bromobenzoate (1j)**. The crude compound was purified by silica gel column chromatography (1:1, hexane:EA) to give the title compound **2i** as a colourless liquid (63 mg, 67%). The NMR data is in accordance with the literature.<sup>2a</sup>

**<sup>1</sup>H NMR** (300 MHz, CDCl<sub>3</sub>) δ 7.48 (d, J = 8.4 Hz, 2H), 7.24 (d, J = 8.6 Hz, 2H), 4.65 (s, 2H).

**<sup>13</sup>C NMR** (75 MHz, CDCl<sub>3</sub>) δ 139.7, 131.6, 128.5, 121.4, 64.6.

**(Z)-octadec-9-en-1-ol, 2k<sup>3</sup>**

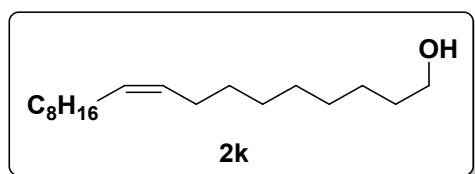

Compound **2k** was prepared according to the general procedure **1.4.** using **methyl oleate (1k)**. The crude compound was purified by silica gel column chromatography (3:2, hexane:EA) to give the title compound **2k** as a colourless liquid (69 mg, 52%). The NMR data is in accordance with the literature.<sup>3</sup>

**<sup>1</sup>H NMR** (300 MHz,  $CDCl_3$ )  $\delta$  5.35 (t,  $J$  = 5.5 Hz, 2H), 3.64 (t,  $J$  = 6.6 Hz, 2H), 2.11 – 1.95 (m, 4H), 1.55 (dd,  $J$  = 13.7, 6.8 Hz, 2H), 1.39 – 1.21 (m, 22H), 0.88 (t,  $J$  = 6.7 Hz, 3H).

**<sup>13</sup>C NMR** (75 MHz,  $CDCl_3$ )  $\delta$  129.9, 63.0, 32.8, 31.9, 29.7, 29.5, 29.4, 29.3, 29.2, 27.2, 27.1, 25.7, 22.6, 14.0 (several  $CH_2$  carbons along the chain overlap due to pseudo symmetry; only distinct peaks are listed).<sup>3</sup>

**Decan-1-ol, 2l<sup>2a</sup>**

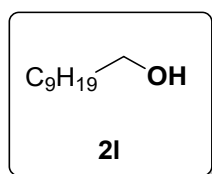

Compound **2l** was prepared according to the general procedure **1.4.** using **methyl decanoate (1l)**. The crude compound was purified by silica gel column chromatography (3:2, hexane:EA) to give the title compound **2l** as colourless liquid (54 mg, 68%). The NMR data is in accordance with the literature.<sup>2a</sup>

Compound **2l** was prepared according to the general procedure **1.4.** using **1-Decanal (1m)**. The crude compound was purified by silica gel column chromatography (3:2, hexane:EA) to give the title compound **2l** as colourless liquid (67 mg, 85%).

**<sup>1</sup>H NMR** (300 MHz,  $CDCl_3$ )  $\delta$  3.64 (t,  $J$  = 6.6 Hz, 2H), 1.58 (dd,  $J$  = 13.3, 5.5 Hz, 2H), 1.39 – 1.15 (m, 14H), 0.88 (t,  $J$  = 6.7 Hz, 3H).

**<sup>13</sup>C NMR** (126 MHz,  $CDCl_3$ )  $\delta$  63.1, 32.8, 31.8, 29.6, 29.5, 29.4, 29.3, 25.7, 22.6, 14.0.

**(2-amino-3,5-dibromophenyl)methanol, 2o**

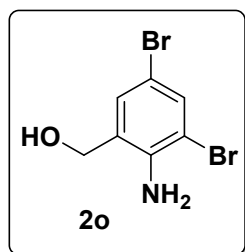

Compound **2o** was prepared according to the general procedure **1.4.** using **2-amino-3,5-dibromobenzaldehyde (1o)**. The crude compound was purified by silica gel column chromatography (1:1, hexane:EA) to give the title compound **2o** as a pale yellow liquid (99 mg, 71%).

**<sup>1</sup>H NMR** (300 MHz,  $DMSO-d_6$ )  $\delta$  7.47 (d,  $J$  = 2.2 Hz, 1H), 7.28 (d,  $J$  = 2.1 Hz, 1H), 5.33 (t,  $J$  = 5.5 Hz, 1H), 5.20 (s, 2H), 4.40 (d,  $J$  = 5.5 Hz, 2H).

**<sup>13</sup>C NMR** (75 MHz, DMSO-d<sub>6</sub>) δ 142.6, 132.3, 129.8, 129.3, 108.8, 106.9, 60.8.

**HRMS** (ESI-TOF) m/z: [M-OH]<sup>+</sup> calcd. for C<sub>7</sub>H<sub>6</sub>Br<sub>2</sub>N<sup>+</sup>: 261.88615, found 261.88627.

**Pyridin-3-ylmethanol, 2p<sup>4a</sup>**

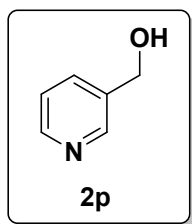

Compound **2p** was prepared according to the general procedure **1.4.** using **nicotinaldehyde (1p)**. The crude compound was purified by silica gel column chromatography (3:2, hexane:EA) to give the title compound **2p** as a colourless liquid (54 mg, 80%). The NMR data is in accordance with the literature (Note: δ 8.46 (s, 1H) likely an unresolved doublet, literature 400 MHz spectrum shows a doublet, unresolved at 300 MHz).<sup>4a</sup>

**<sup>1</sup>H NMR** (300 MHz, CDCl<sub>3</sub>) δ 8.51 (s, 1H), 8.46 (s, 1H), 7.70 (d, *J* = 7.7 Hz, 1H), 7.28-7.24 (m, 1H), 4.69 (s, 2H).

**<sup>13</sup>C NMR** (75 MHz, CDCl<sub>3</sub>) δ 148.5, 148.2, 136.6, 135.0, 123.5, 62.4.

**N-(4-(hydroxymethyl)phenyl)acetamide, 2q<sup>2b</sup>**

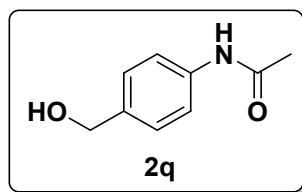

Compound **2q** was prepared according to the general procedure **1.4.** using **N-(4-formylphenyl)acetamide (1q)**. The crude compound was purified by silica gel column chromatography (1:1, hexane:EA) to give the title compound **2q** as a pale yellow liquid (22 mg, 26%). The NMR data is in accordance with the literature.<sup>2b</sup>

**<sup>1</sup>H NMR** (300 MHz, DMSO-d<sub>6</sub>) δ 9.87 (s, 1H), 7.53 (d, *J* = 8.5 Hz, 2H), 7.23 (d, *J* = 8.5 Hz, 2H), 5.08 (t, *J* = 5.7 Hz, 1H), 4.44 (d, *J* = 5.7 Hz, 2H), 2.04 (s, 3H).

**<sup>13</sup>C NMR** (75 MHz, DMSO-d<sub>6</sub>) δ 168.5, 138.4, 137.5, 127.3, 119.2, 63.1, 24.4.

**2-(benzyloxy)ethan-1-ol, 2r<sup>4b</sup>**

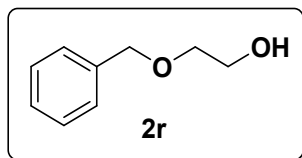

Compound **2r** was prepared according to the general procedure **1.4.** using **2-(benzyloxy)acetaldehyde (1r)**. The crude compound was purified by silica gel column chromatography (3:2, hexane:EA) to give the title compound **2r** as a colourless liquid (38 mg, 50%). The NMR data is in accordance with the literature.<sup>4b</sup>

**<sup>1</sup>H NMR** (300 MHz, CDCl<sub>3</sub>) δ 7.37 – 7.24 (m, 5H), 4.56 (s, 2H), 3.76 – 3.73 (m, 2H), 3.60 – 3.51 (m, 2H).

**<sup>13</sup>C NMR** (75 MHz, CDCl<sub>3</sub>) δ 138.0, 128.4, 127.8, 73.3, 71.4, 61.8.



#### 4-(hydroxymethyl)-2-methoxyphenol, **2v**<sup>4c</sup>

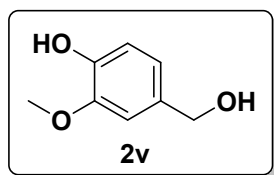

Compound **2v** was prepared according to the general procedure **1.4.** using **4-hydroxy-3-methoxybenzaldehyde (1v)** using **primed PS-TPP-[Mn] catalyst**. The crude compound was purified by silica gel column chromatography (1:1, hexane:EA) to give the title compound **2v** as a pale yellow liquid (38 mg, 50%). The NMR data is in accordance with the literature.<sup>4c</sup>

Compound **2v** was prepared according to the general procedure **1.4.** using **4-hydroxy-3-methoxybenzaldehyde (1v)** using **un-primed PS-TPP-[Mn] catalyst**. The crude compound was purified by silica gel column chromatography (1:1, hexane:EA) to give the title compound **2v** as a pale yellow liquid (23 mg, 30%).

**<sup>1</sup>H NMR** (300 MHz, DMSO-d<sub>6</sub>) δ 8.73 (s, 1H), 6.87 (s, 1H), 6.70 (s, 2H), 4.96 (s, 1H), 4.37 (d, J = 3.2 Hz, 2H), 3.74 (s, 3H).

**<sup>13</sup>C NMR** (75 MHz, DMSO-d<sub>6</sub>) δ 147.8, 145.7, 133.9, 119.5, 115.4, 111.5, 63.4, 55.9.

#### (3-methylpyridin-2-yl)methanol **2w**<sup>5</sup>

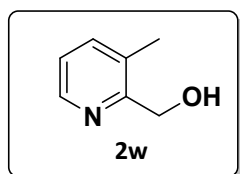

Compound **2w** was prepared according to the general procedure **1.4.** using **methyl 3-methylpicolinate (1w)** using **primed PS-TPP-[Mn] catalyst**. The crude compound was purified by silica gel column chromatography (10:1, hexane:EA) to give the title compound **2w** as a yellow liquid (39 mg, 50%). The NMR data is in accordance with the literature.<sup>5</sup>

**<sup>1</sup>H NMR** (300 MHz, CDCl<sub>3</sub>) δ 8.38 (s, 1H), 7.44 (d, J = 7.5 Hz, 1H), 7.13 (dd, J = 7.3, 4.6 Hz, 1H), 4.67 (s, 2H), 2.20 (s, 3H).

**<sup>13</sup>C NMR** (75 MHz, CDCl<sub>3</sub>) δ 156.1, 145.1, 137.5, 129.5, 122.0, 61.4, 16.4.

#### 2-(4-methoxyphenyl)ethan-1-ol, **2y**<sup>3</sup>

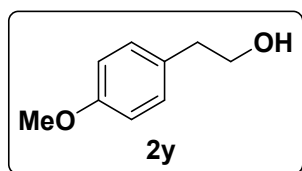

Compound **2y** was prepared according to the general procedure **1.4.** using **methyl 2-(4-methoxyphenyl) acetate (1y)** using **primed PS-TPP-[Mn] catalyst**. The crude compound was purified by silica gel column chromatography (3:2, hexane:EA) to give the title compound **2y** as a colourless liquid (69 mg, 92%). The NMR data is in accordance with the literature.<sup>3</sup>

**<sup>1</sup>H NMR** (500 MHz, CDCl<sub>3</sub>) δ 7.18 – 7.12 (m, 2H), 6.87 – 6.85 (m, 2H), 3.85 – 3.80 (m, 2H), 3.79 (s, 3H), 2.81 (t, J = 6.6 Hz, 2H).

$^{13}\text{C}$  NMR (126 MHz,  $\text{CDCl}_3$ )  $\delta$  158.3, 130.4, 129.9, 114.0, 63.8, 55.2, 38.2.

**Naphthalen-1-ylmethanol,  $2z^{2a}$**

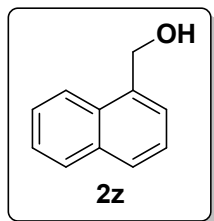

Compound **2z** was prepared according to the general procedure **1.4.** using **methyl 1-naphthoate (1z)** using **primed PS-TPP-[Mn] catalyst**. The crude compound was purified by silica gel column chromatography (1:1, hexane:EA) to give the title compound **2z** as off white solid (67mg, 85%). The NMR data is in accordance with the literature.<sup>2a</sup>

$^1\text{H}$  NMR (300 MHz,  $\text{CDCl}_3$ )  $\delta$  8.14 (dd,  $J$  = 8.0, 1.1 Hz, 1H), 7.95 – 7.76 (m, 2H), 7.62 – 7.40 (m, 4H), 5.17 (s, 2H).

$^{13}\text{C}$  NMR (75 MHz,  $\text{CDCl}_3$ )  $\delta$  136.2, 133.8, 131.2, 128.6, 128.6, 126.3, 125.8, 125.4, 125.3, 123.6, 63.7.

**(S)-2-(6-methoxynaphthalen-2-yl) propan-1-ol, 3a (naproxen),  $2aa^{6a}$**

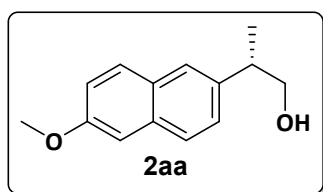

Compound **2aa** was prepared according to the general procedure **1.4.** using **methyl (S)-2-(6-methoxynaphthalen-2-yl) propanoate (1aa)** using **primed PS-TPP-[Mn] catalyst**. The crude compound was purified by silica gel column chromatography (3:2, hexane:EA) to give the title compound **2aa** as a pale yellow oil (89 mg, 83%). The NMR data is in accordance with the literature.<sup>6a</sup>

$^1\text{H}$  NMR (300 MHz,  $\text{CDCl}_3$ )  $\delta$  7.71 (dd,  $J$  = 8.5, 4.9 Hz, 2H), 7.61 (d,  $J$  = 1.1 Hz, 1H), 7.35 (dd,  $J$  = 8.5, 1.8 Hz, 1H), 7.18 – 7.10 (m, 2H), 3.92 (s, 3H), 3.78 (d,  $J$  = 6.8 Hz, 2H), 3.09 (sext,  $J$  = 6.9 Hz, 1H), 1.36 (d,  $J$  = 7.0 Hz, 3H).

$^{13}\text{C}$  NMR (75 MHz,  $\text{CDCl}_3$ )  $\delta$  157.4, 138.6, 133.5, 129.1, 129.0, 127.2, 126.2, 125.9, 118.9, 105.6, 68.6, 55.3, 42.4, 17.6.

**2-(4-isobutylphenyl) propan-1-ol,  $2ab^{6b}$**

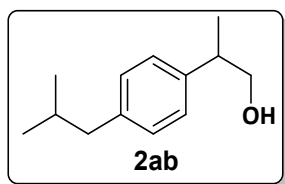

Compound **2ab** was prepared according to the general procedure **1.4.** using **methyl 2-(4-isobutylphenyl) propanoate (1ab)** using **primed PS-TPP-[Mn] catalyst**. The crude compound was purified by silica gel column chromatography (3:2, hexane:EA) to give the title compound **2ab** as a white solid (81 mg, 85%). The NMR data is in accordance with the literature.<sup>6b</sup>

$^1\text{H}$  NMR (300 MHz,  $\text{CDCl}_3$ )  $\delta$  7.18 – 7.08 (m, 4H), 3.69 (d,  $J$  = 6.8 Hz, 2H), 2.93 (dd,  $J$  = 13.9, 6.9 Hz, 1H), 2.45 (d,  $J$  = 7.2 Hz, 2H), 1.84 (td,  $J$  = 13.6, 6.8 Hz, 1H), 1.27 (d,  $J$  = 7.0 Hz, 3H), 0.91 (d,  $J$  = 6.6 Hz, 6H).

$^{13}\text{C}$  NMR (75 MHz,  $\text{CDCl}_3$ )  $\delta$  140.8, 140.0, 129.3, 127.1, 68.7, 45.0, 42.0, 30.2, 22.4, 17.6.

#### 4-benzylmorpholine, **4**<sup>7</sup>

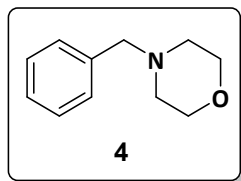

Compound **4** was prepared using similar procedure as **1.4. Morpholino(phenyl)methanone (3)** (0.5mmol), Phenyl silane (2.0 equiv.) and Triphenyl Phosphine Polymer-supported Mn catalyst PS-TPP-[Mn] (20 mg, 4.2 mol%) were charged in to a dry test tube fitted with a screw cap and magnetic stir bar. The reaction was then heated at 100 °C in an oil bath for 3h. The crude compound was purified by silica gel column chromatography (9:1 hexane:EA) to give the title compound **4** as a colourless liquid (87 mg, 98%). The NMR data is in accordance with the literature.<sup>7</sup>

$^1\text{H}$  NMR (300 MHz,  $\text{CDCl}_3$ )  $\delta$  7.38 – 7.20 (m, 5H), 3.75 – 3.64 (m, 4H), 3.49 (s, 2H), 2.46 – 2.39 (t, 4H).

$^{13}\text{C}$  NMR (75 MHz,  $\text{CDCl}_3$ )  $\delta$  137.7, 129.2, 128.2, 127.1, 67.0, 63.4, 53.6.

#### References:

1. B. Ravel and M. Newville, *J Synchrotron Radiat*, **2005**, *12*, 537-541.
2. a) G. Hamasaka, H. Tsuji, Y. Uozumi, *Synlett*, **2015**; 26(14) 2037-2041; b) C. Kuloor, Akash, V. Goyal, R. Zbořil, M. Beller, R. V. Jagadeesh, *Angew. Chem. Int. Ed.* **2025**, *64*, e202414689; c) M. Prakashni, S. Dasgupta, *Org. Biomol. Chem.*, **2024**, *22*, 1871–1884.
3. R. R. Behera, R. Ghosh, S. Panda, S. Khamari, and B. Bagh, *Org. Lett.*, **2020**, *22*, 3642–3648.
4. a) S. Yadav and M. R. Kuram, *Eur. J. Org. Chem.* **2023**, *26*, e202201344; b) L. Saudan, J. Quintaine, *ChemCatChem*, **2023**, *15*, e202300508; c) M. Abid, R. Nouch, T. D. Bradshaw, W. Lewis, S. Woodward, *Eur. J. Inorg. Chem.* **2019**, 2774–2780.
5. A. Gambino, J. C. Burnett, K. Koide, *ACS Medicinal Chemistry Letters* **2020**, *11*, 1893.
6. a) P. Galletti, E. Emer, G. Gucciardo, A. Quintavalla, M. Pori, D. Giacomini *Org. Biomol. Chem.*, **2010**, *8*, 4117–4123; b) E. A. Wappes, K. M. Nakafuku, D. A. Nagib, *J. Am. Chem. Soc.* **2017**, *139*, 10204–10207.
7. C. M. Kelly, R. McDonald, O. L. Sydora, M. Stradiotto, L. Turculet, *Angew. Chem. Int. Ed.* **2017**, *56*, 15901 – 15904.

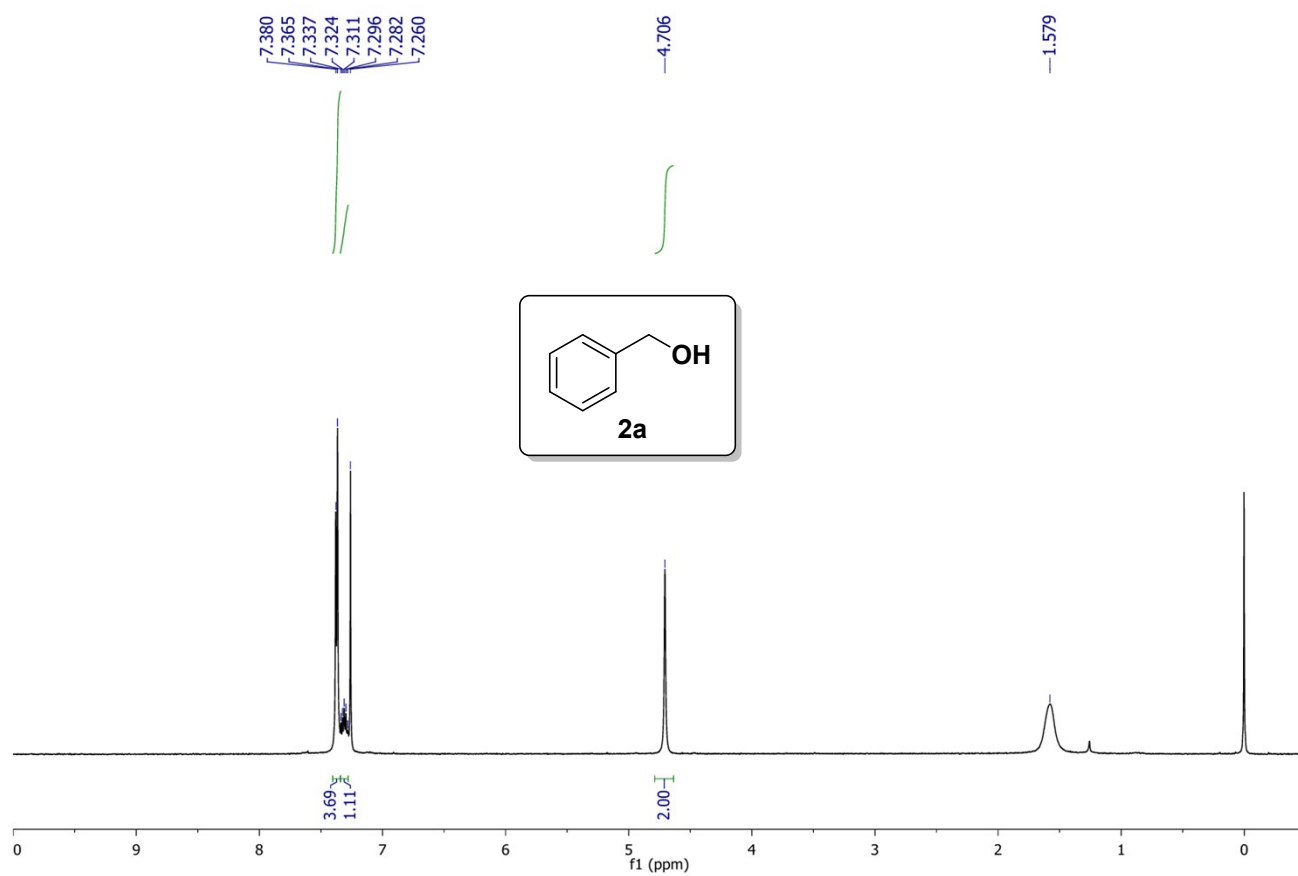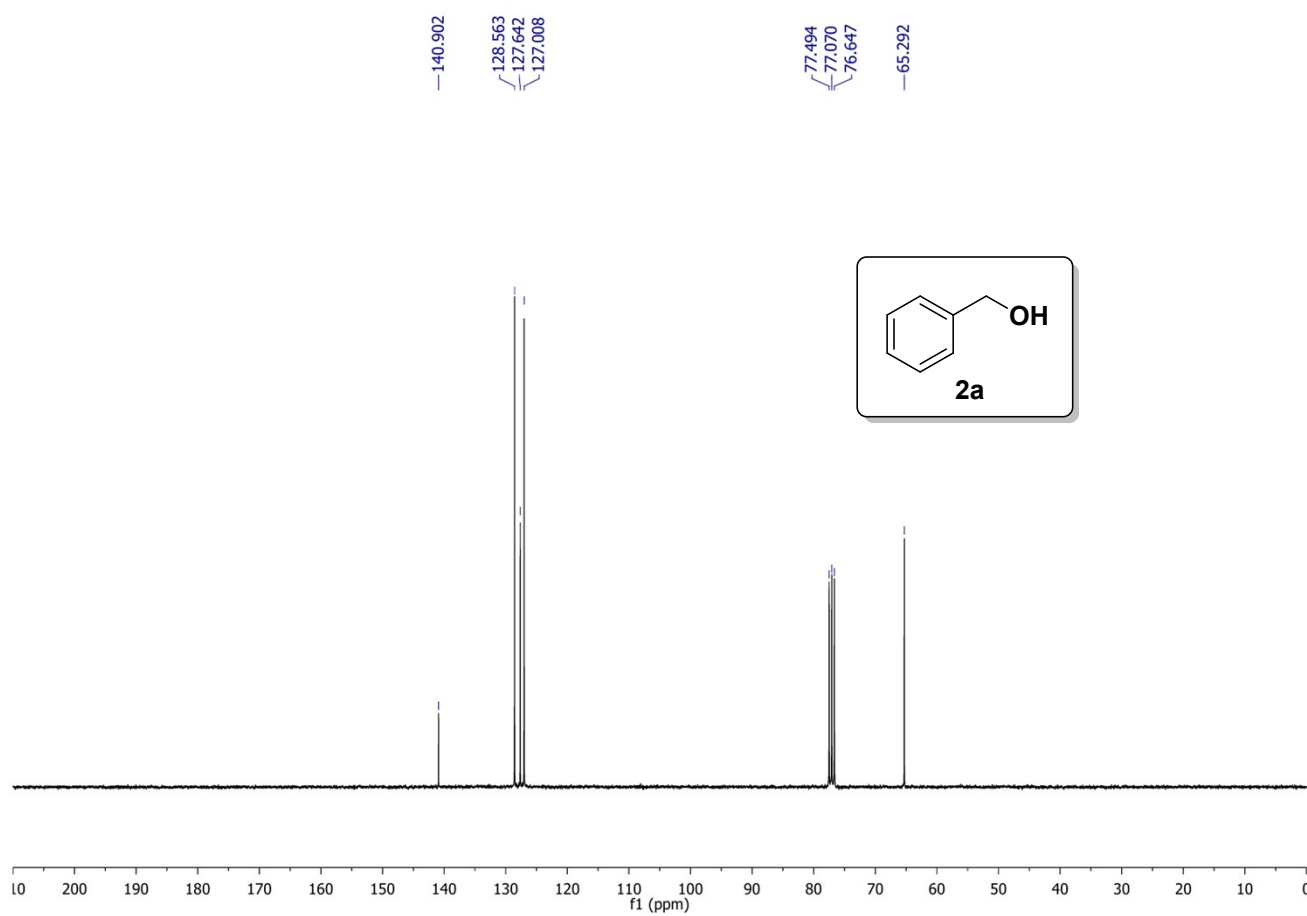

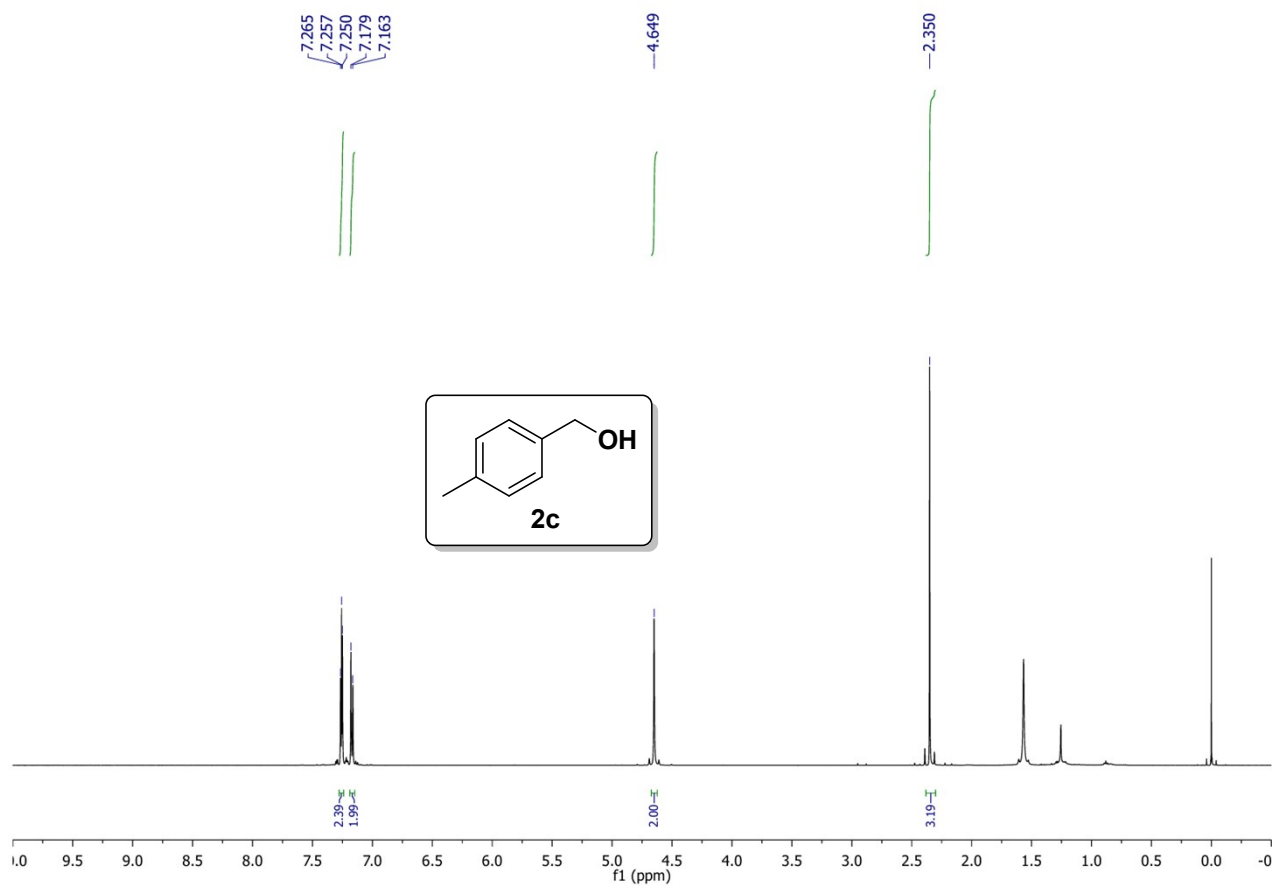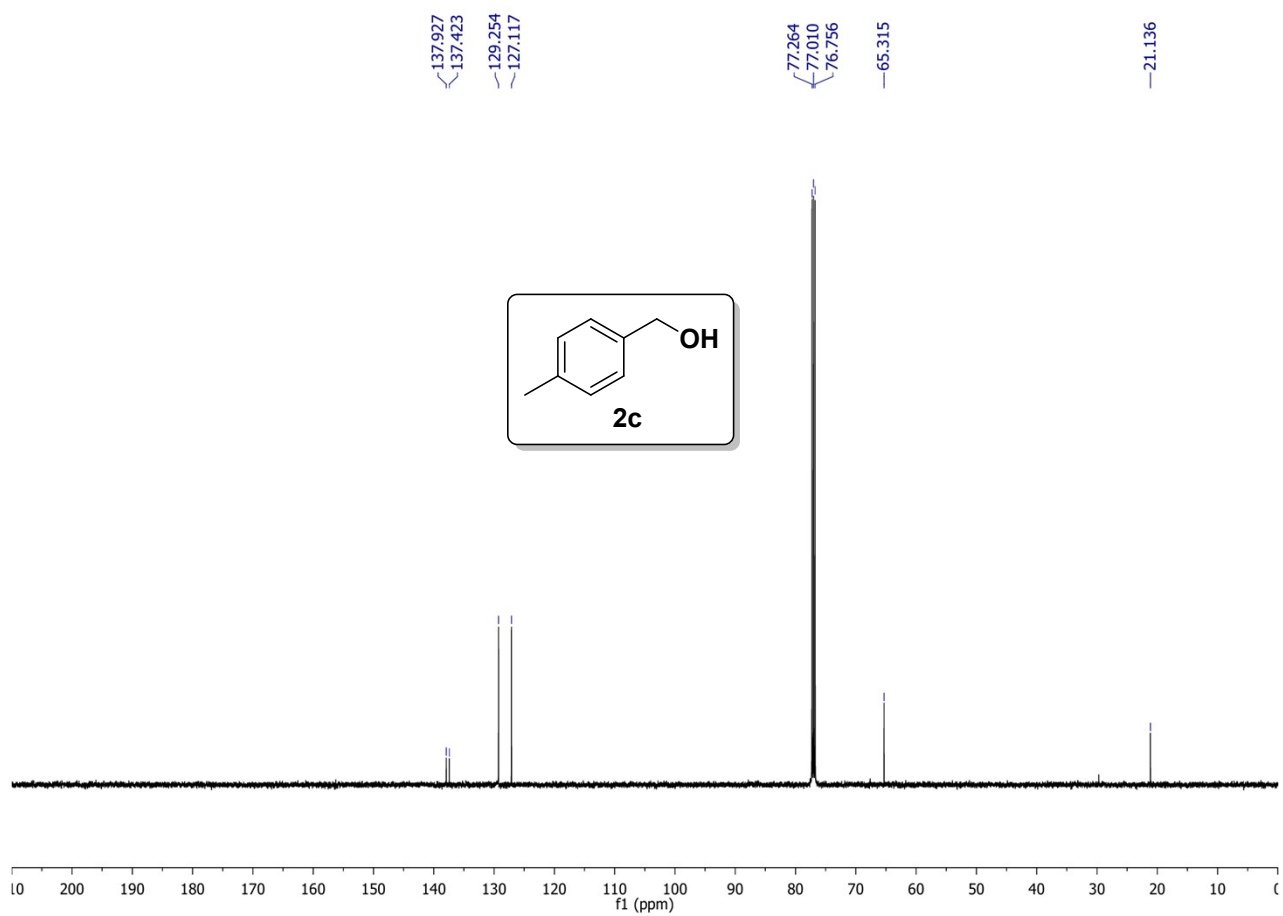

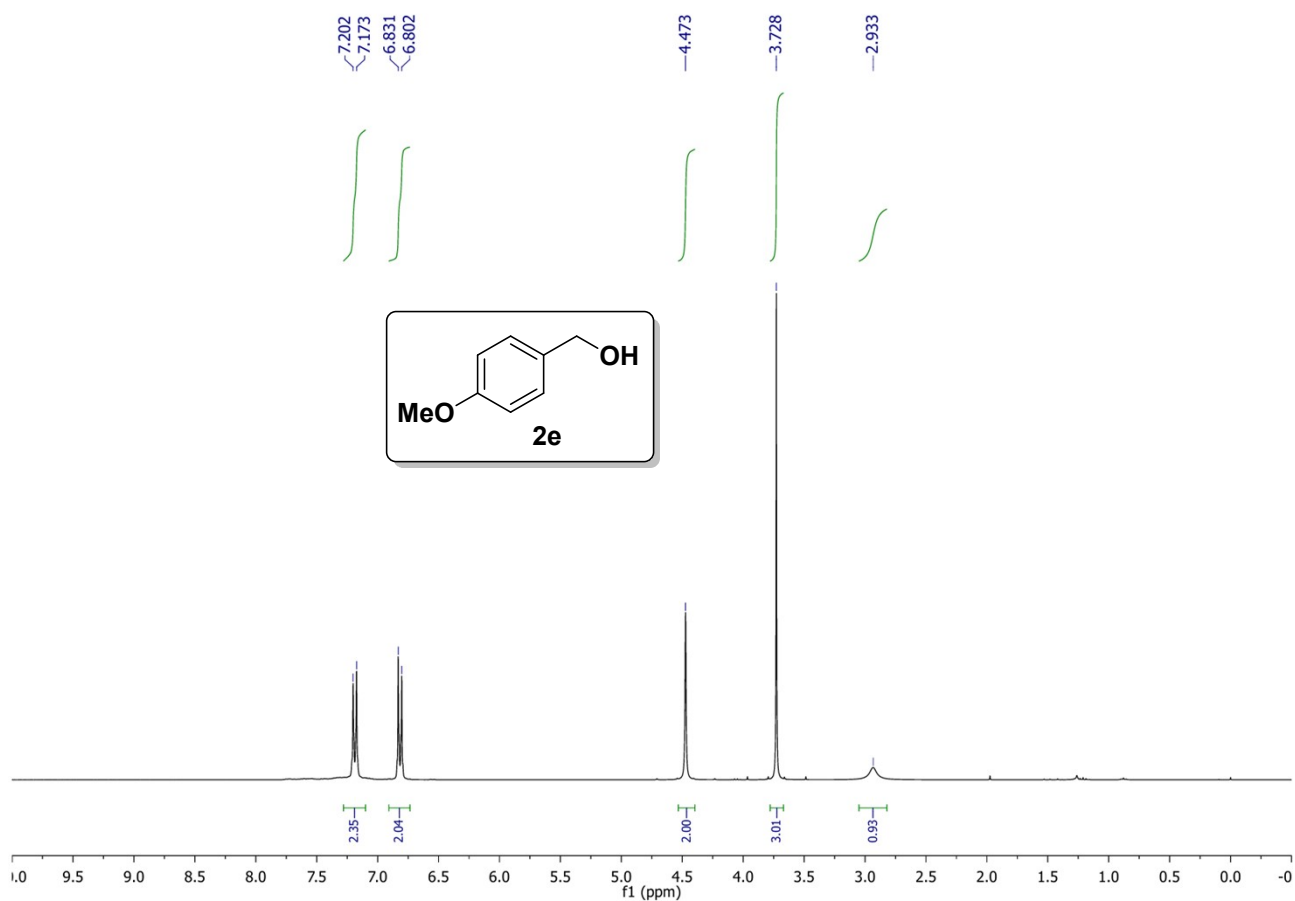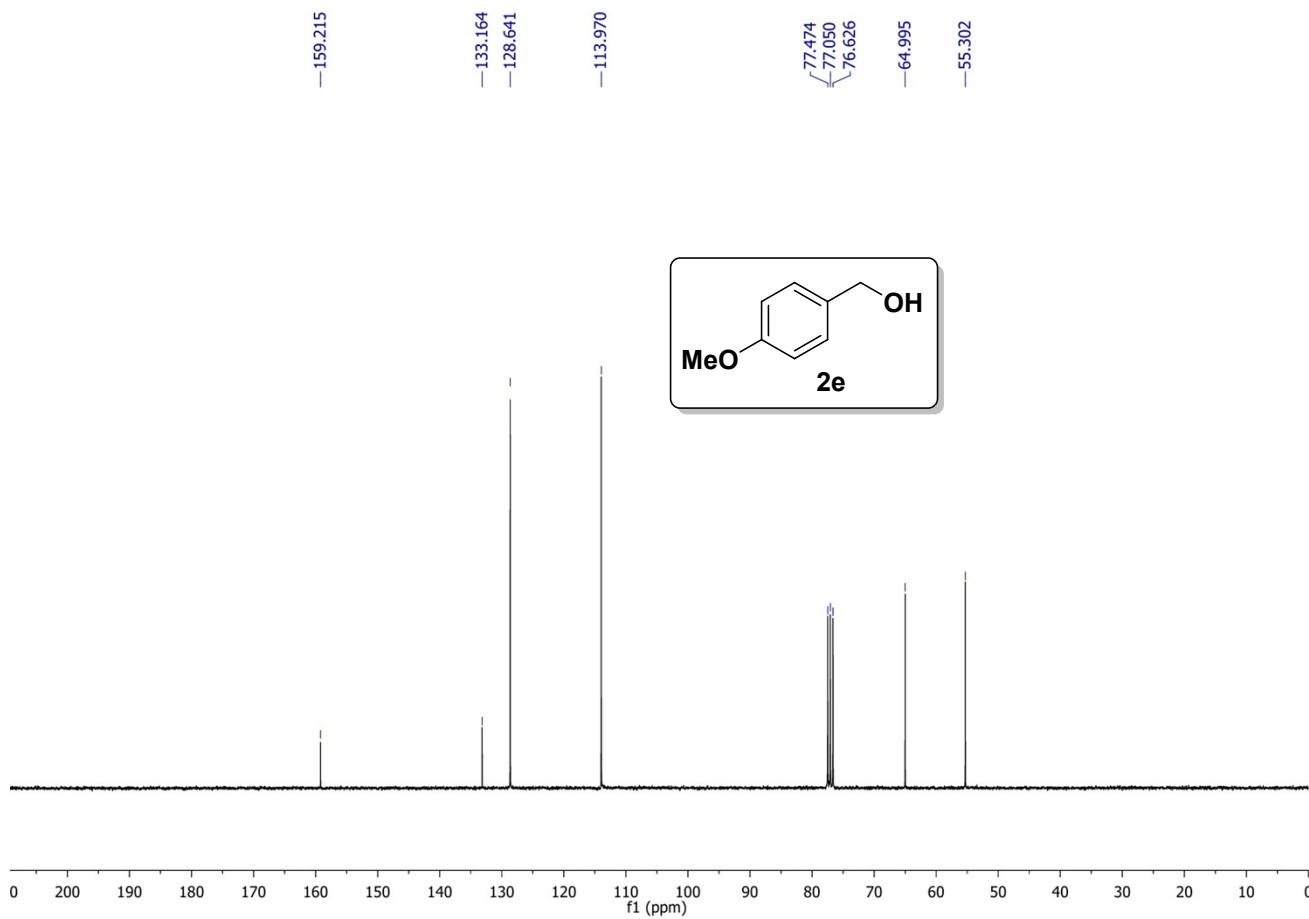

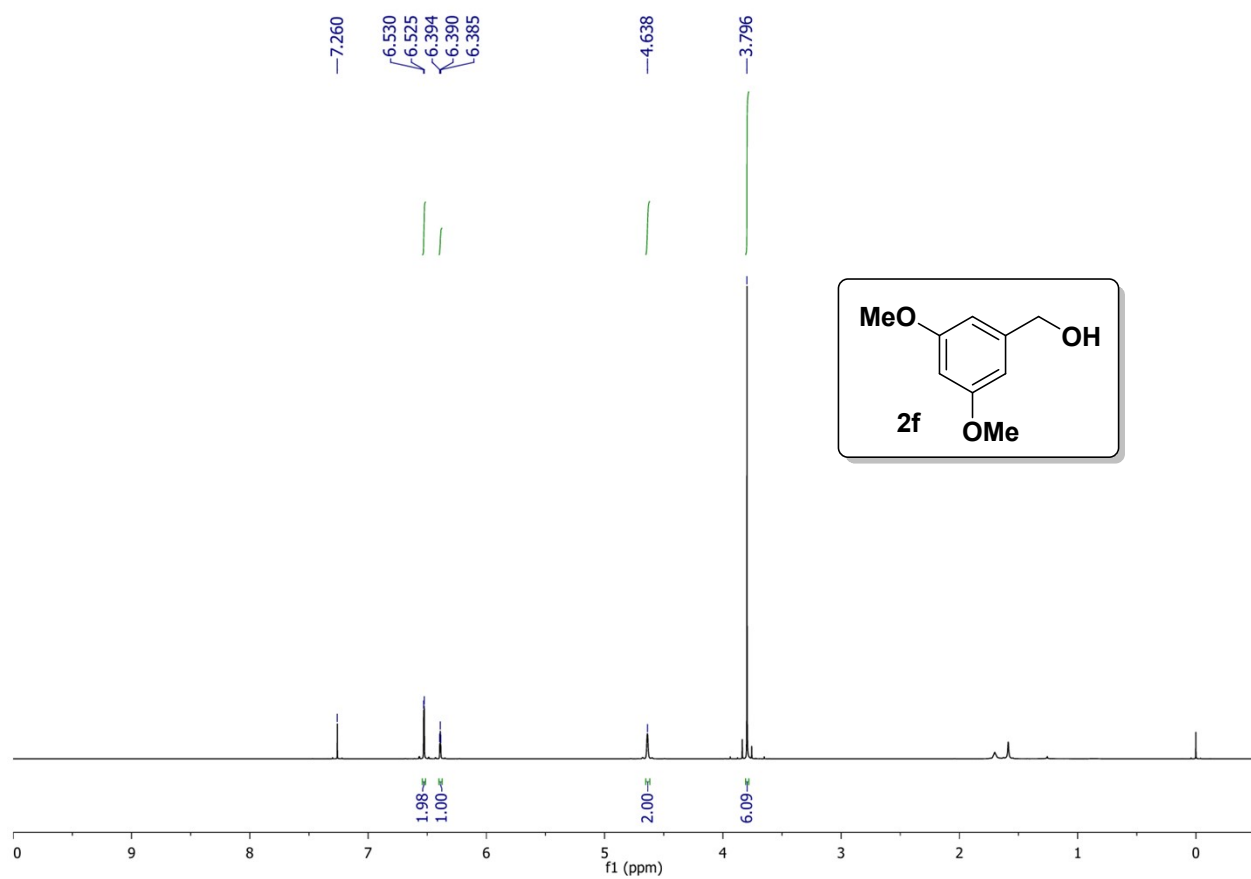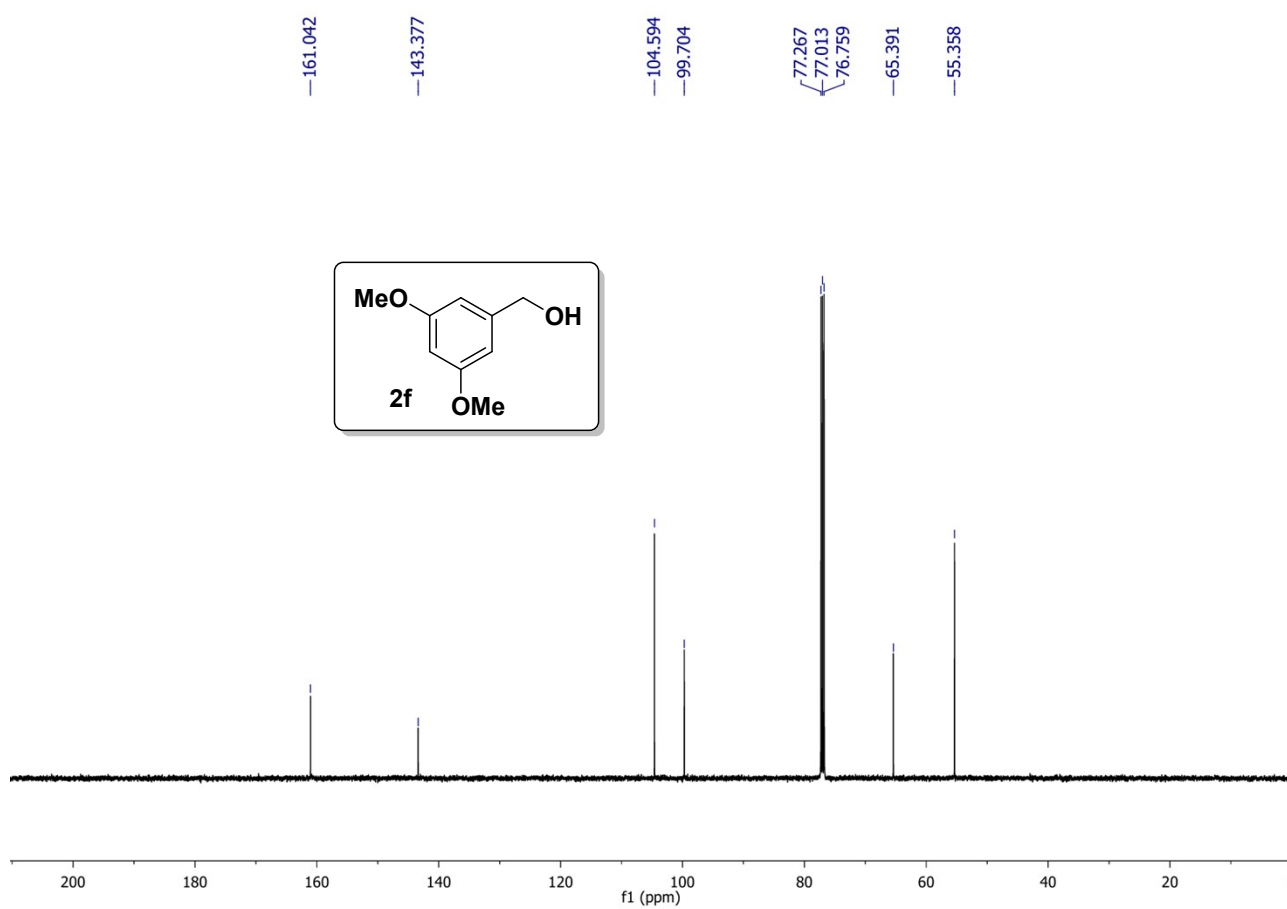

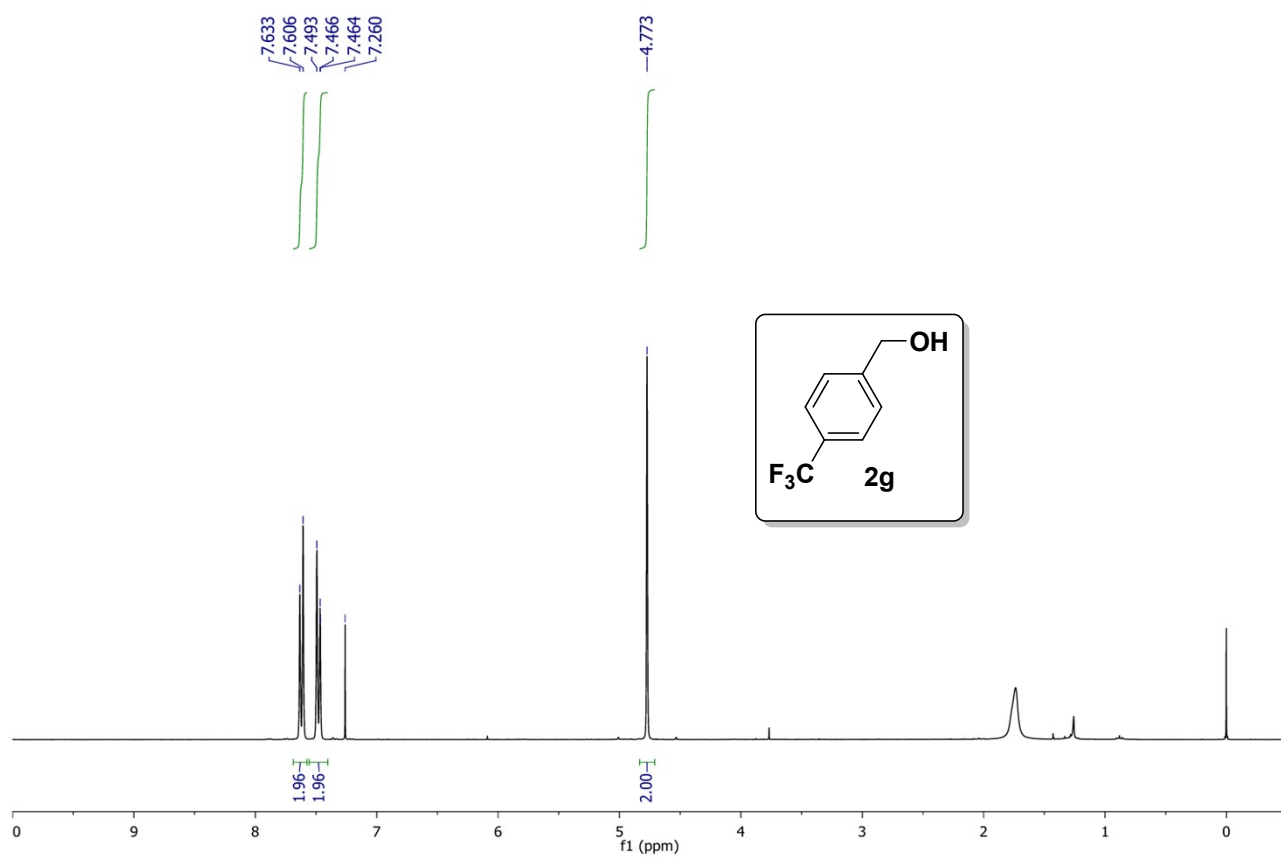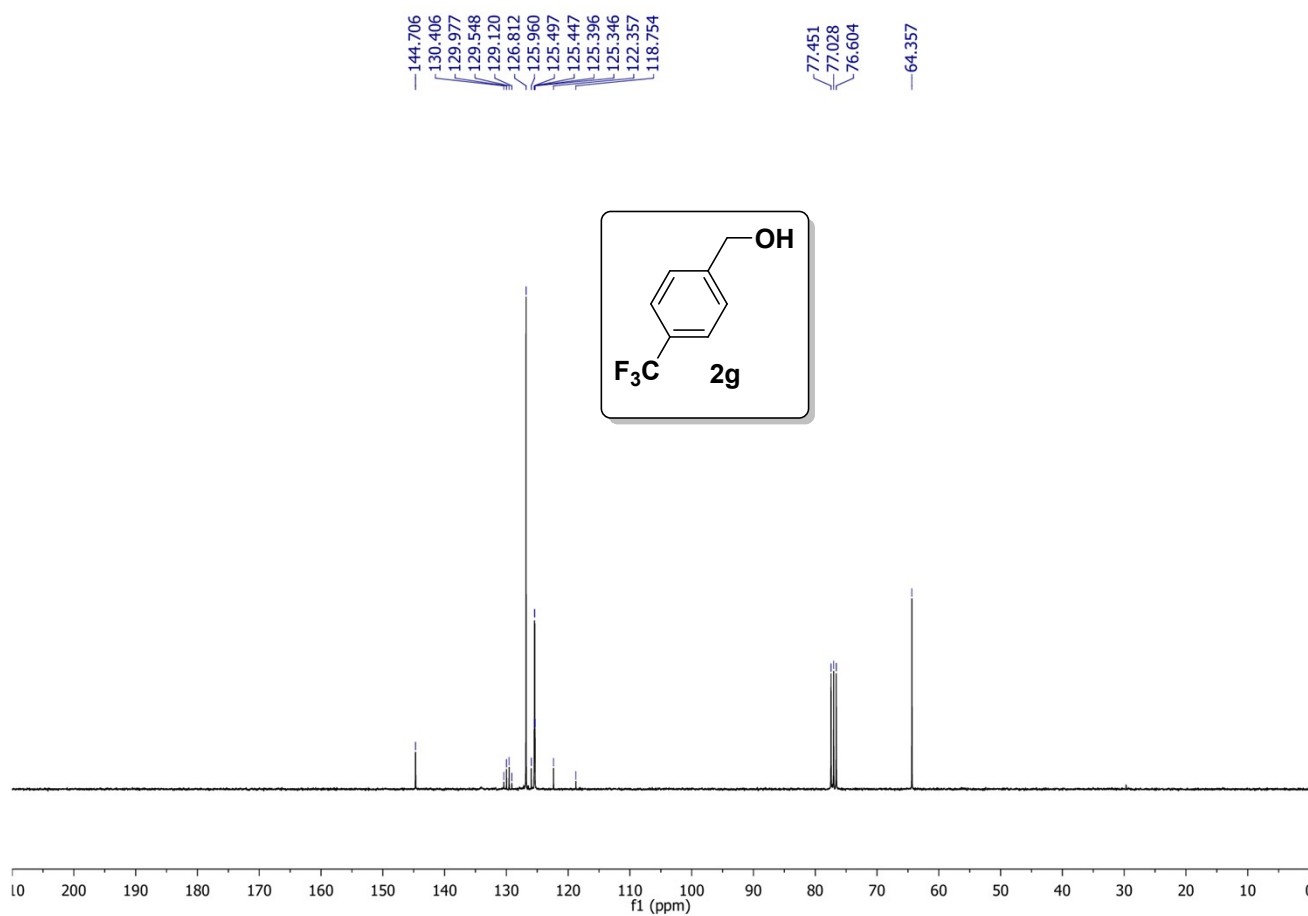



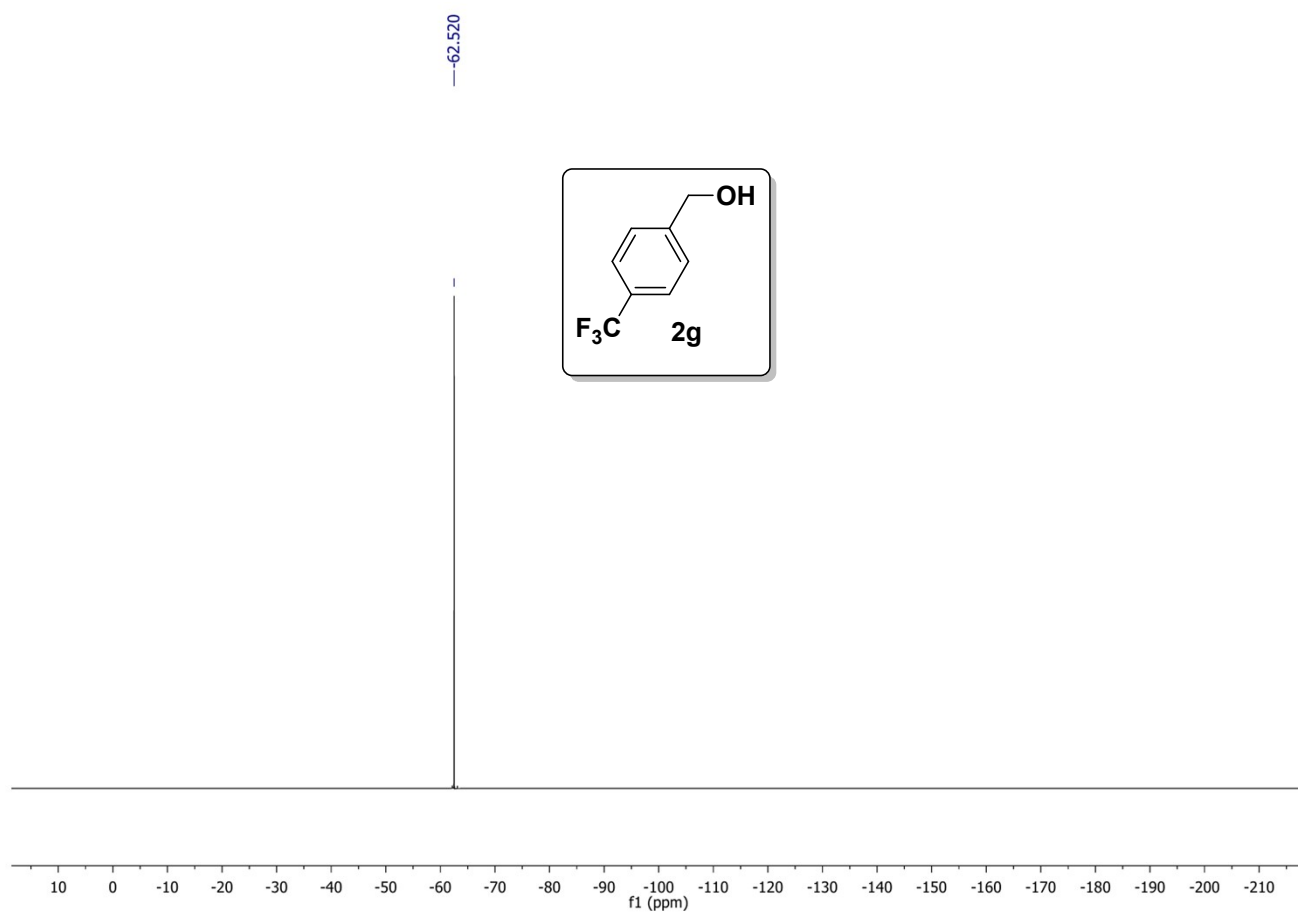

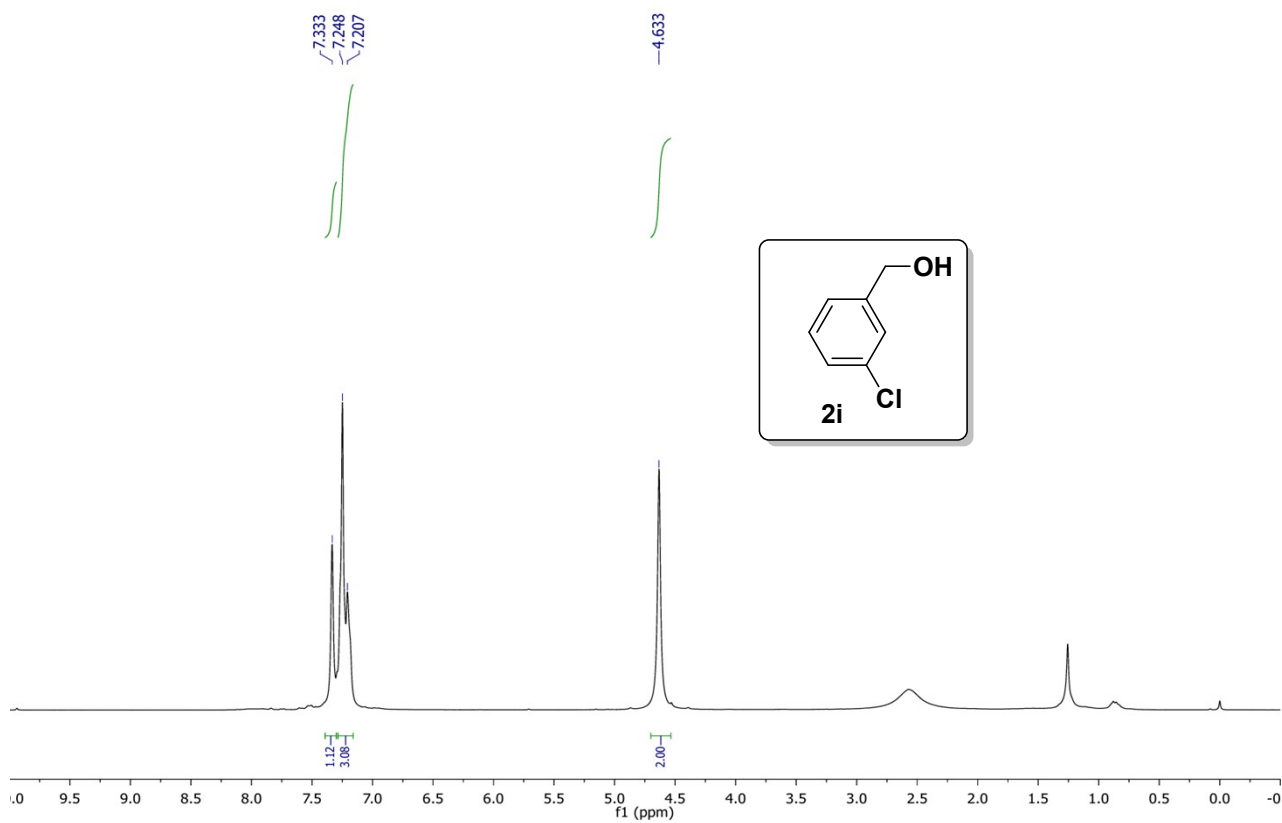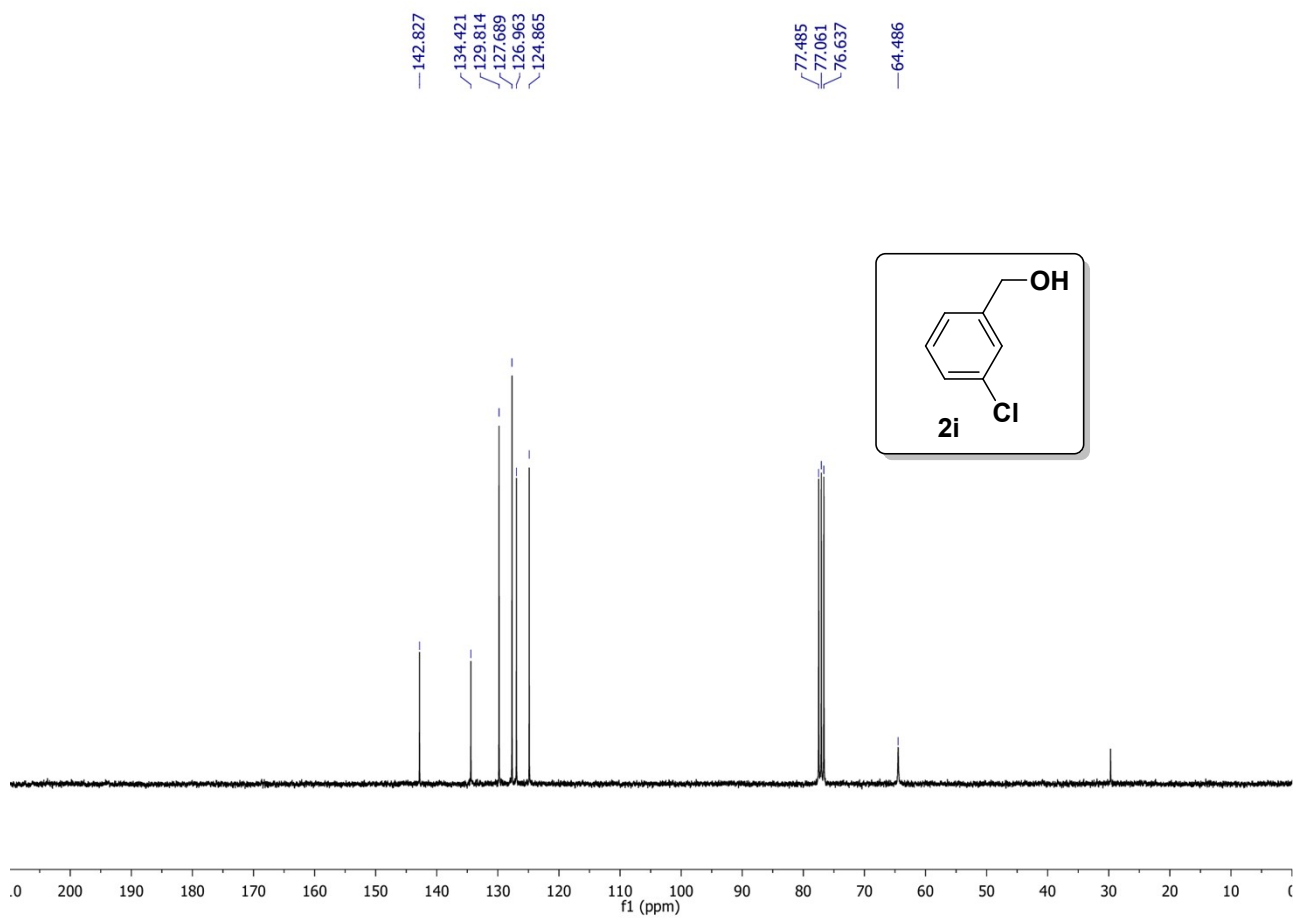

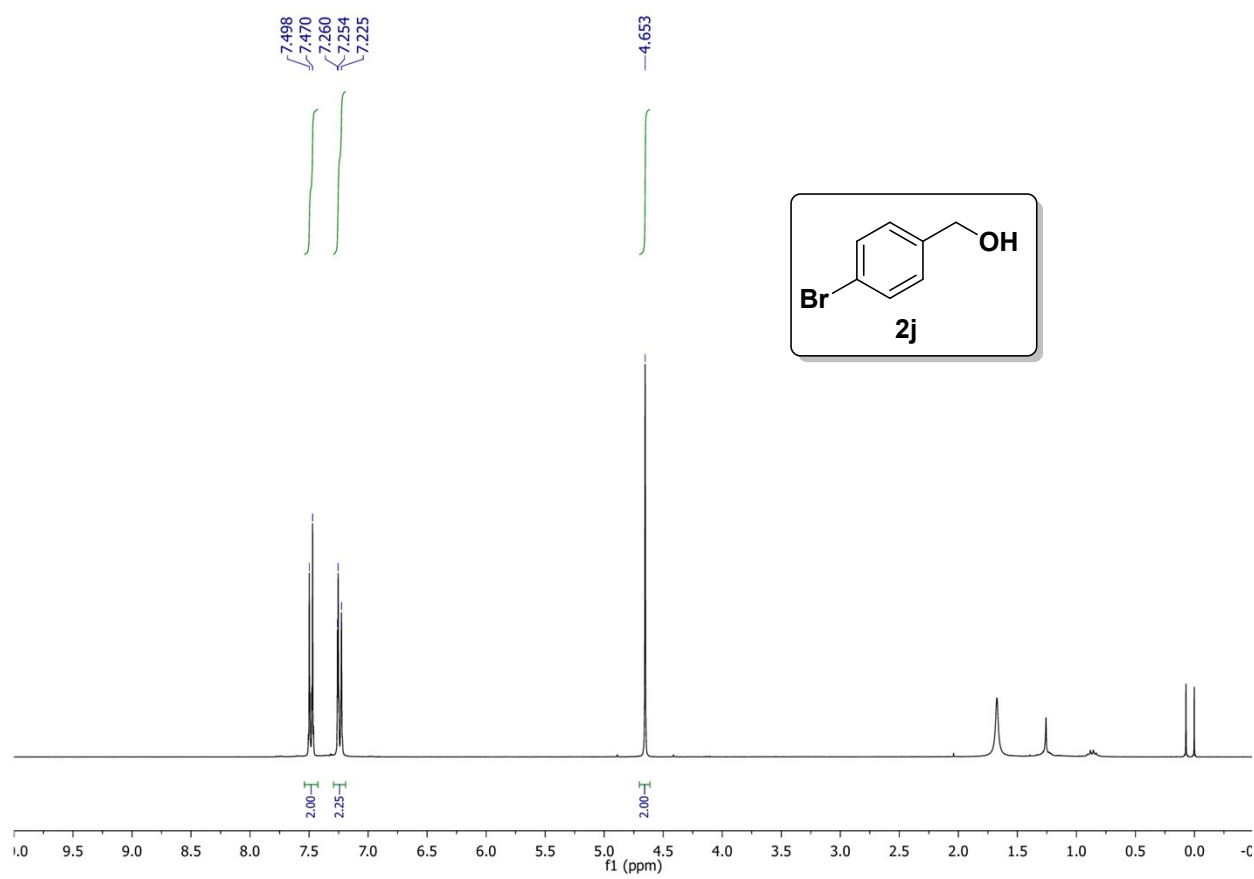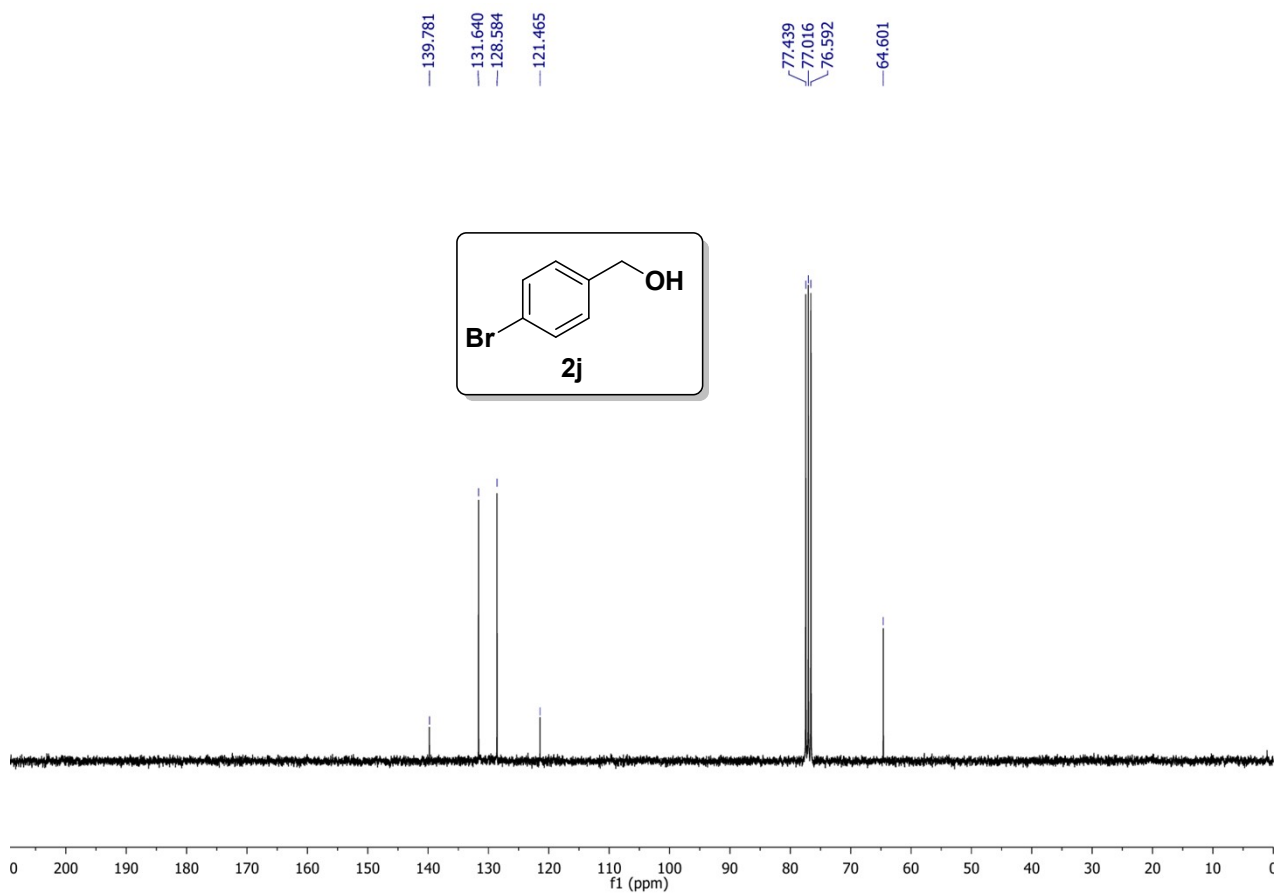

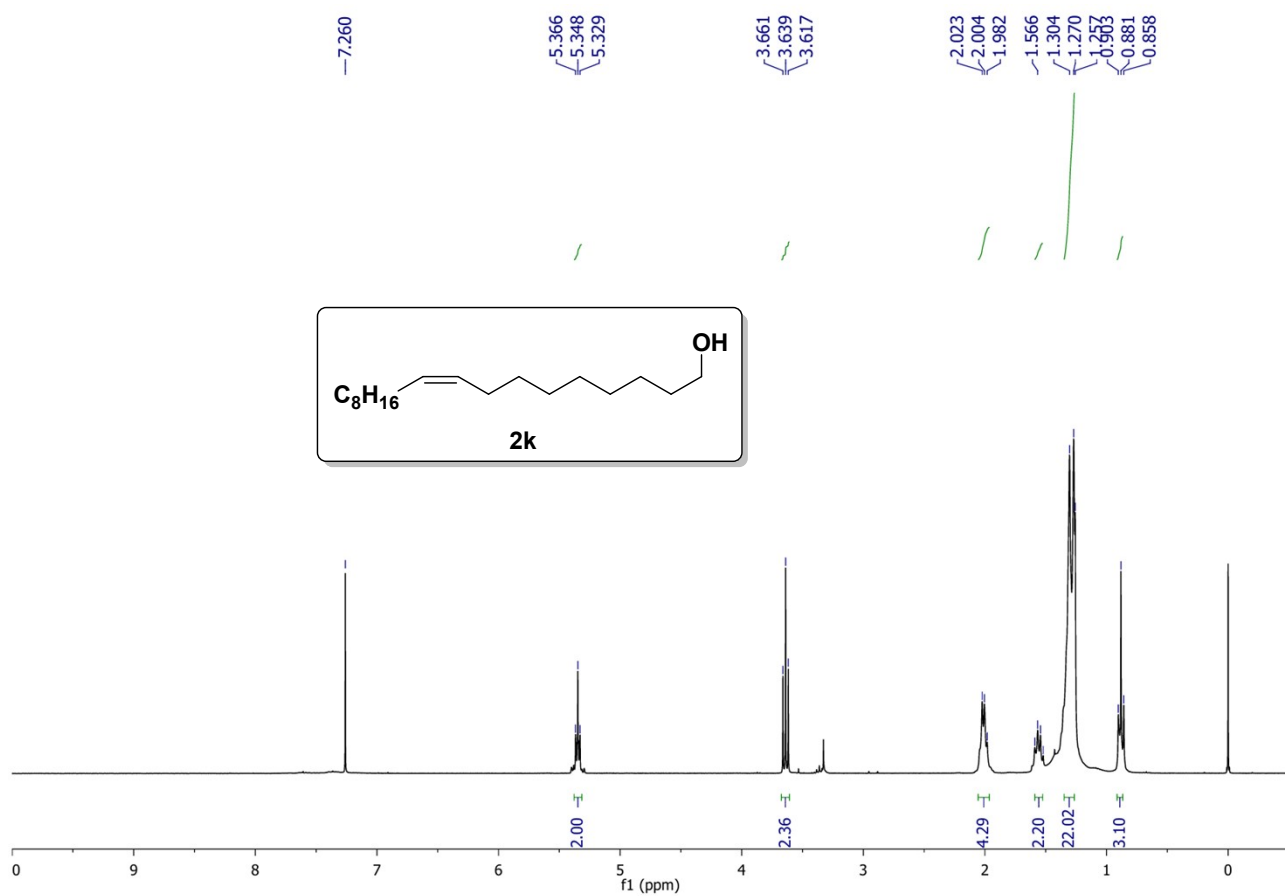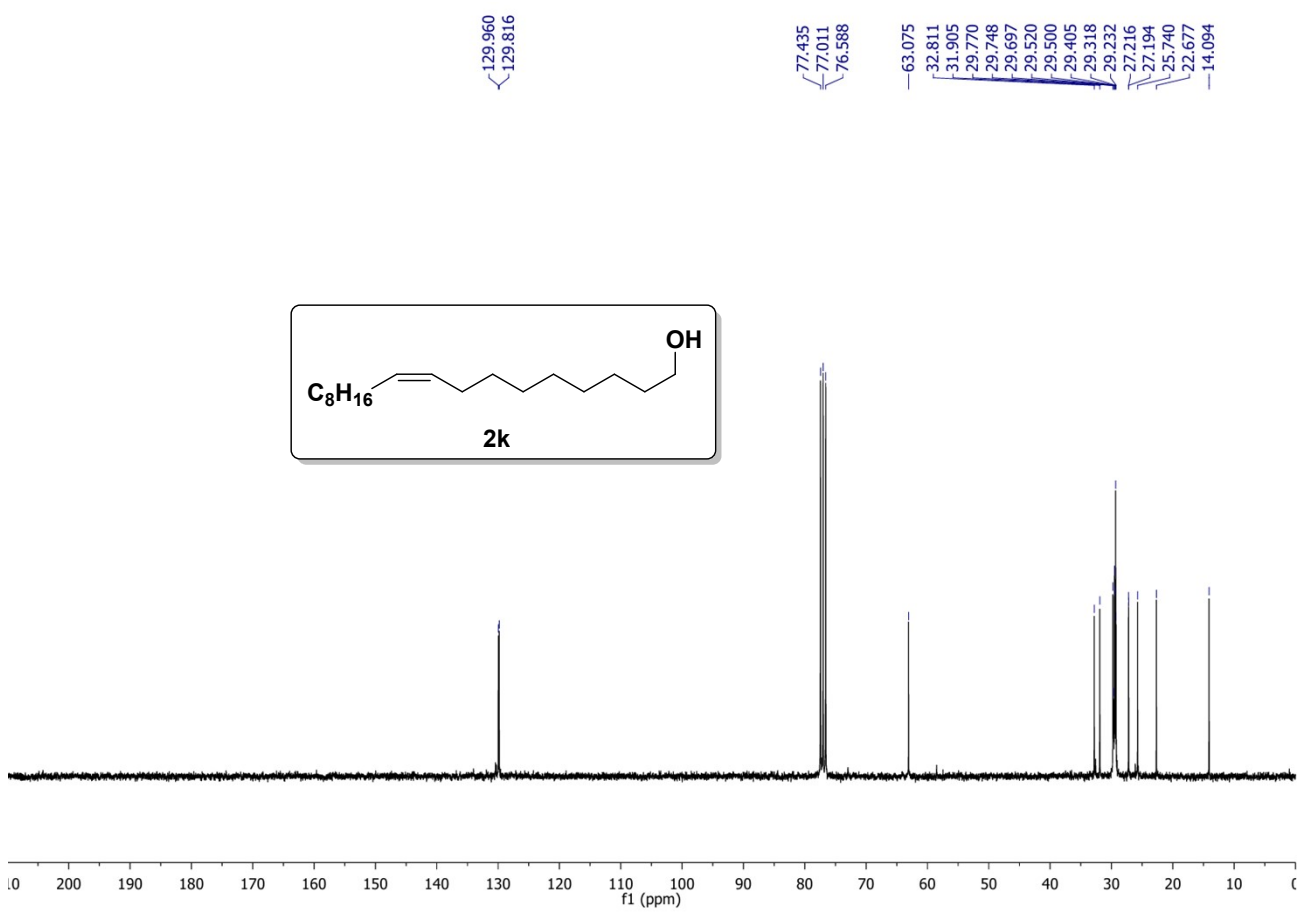

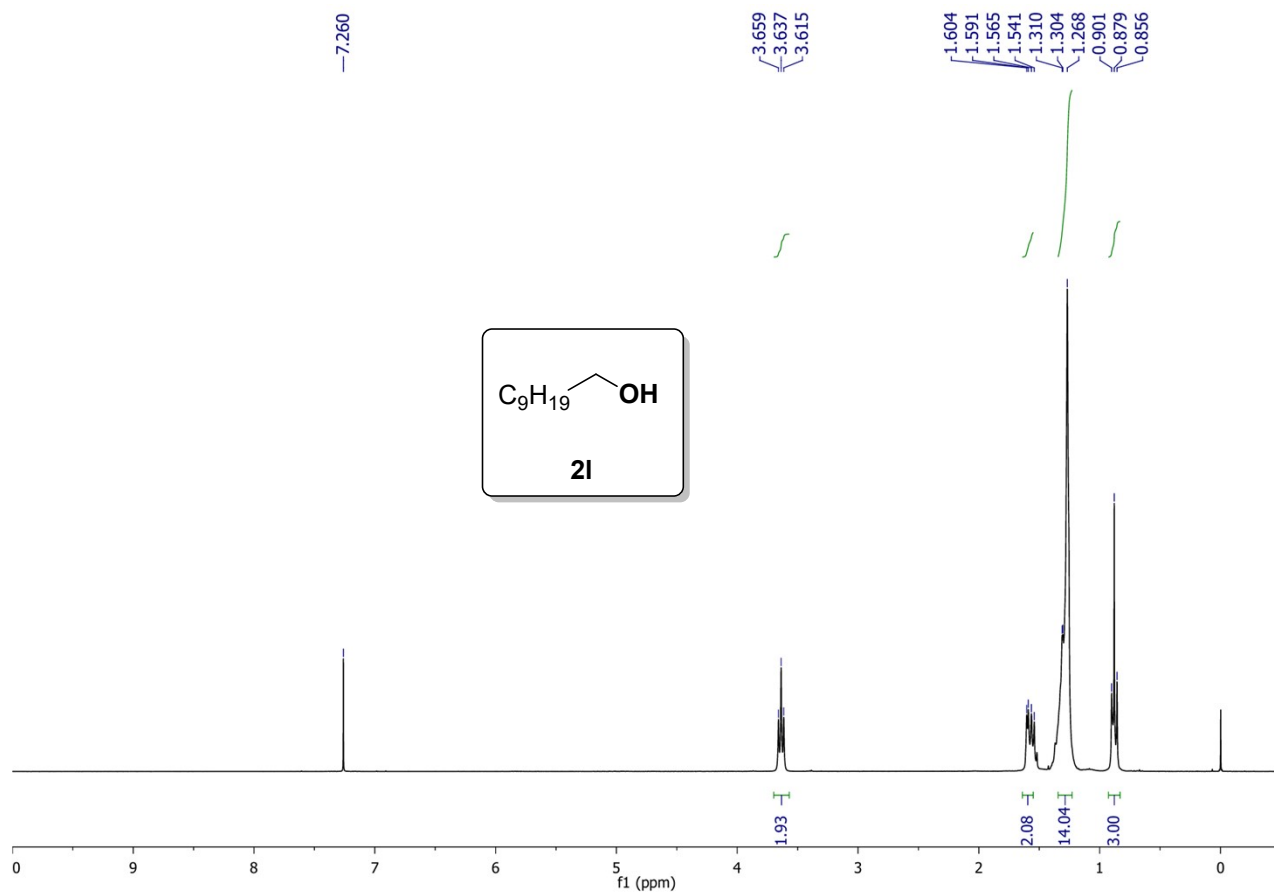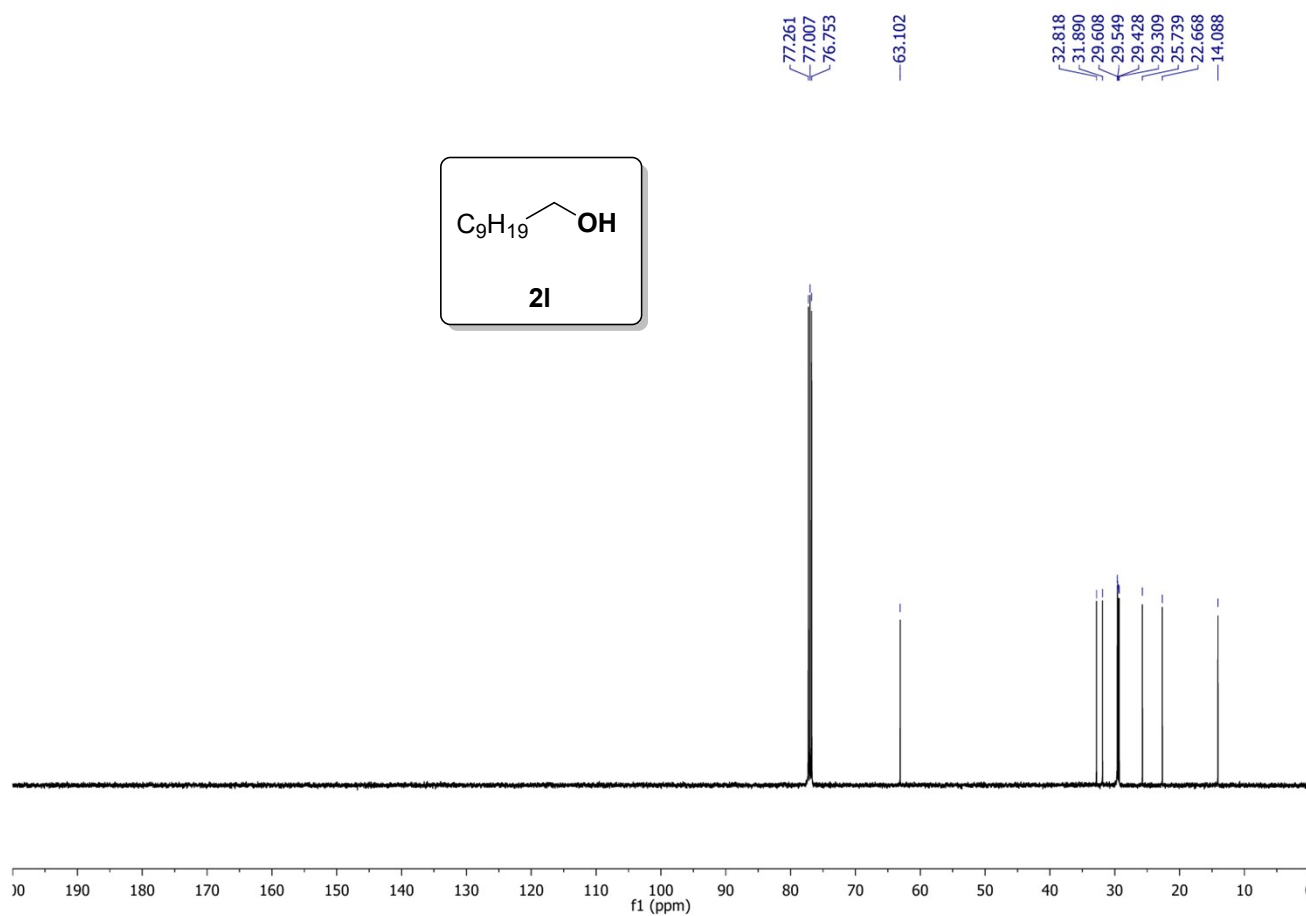

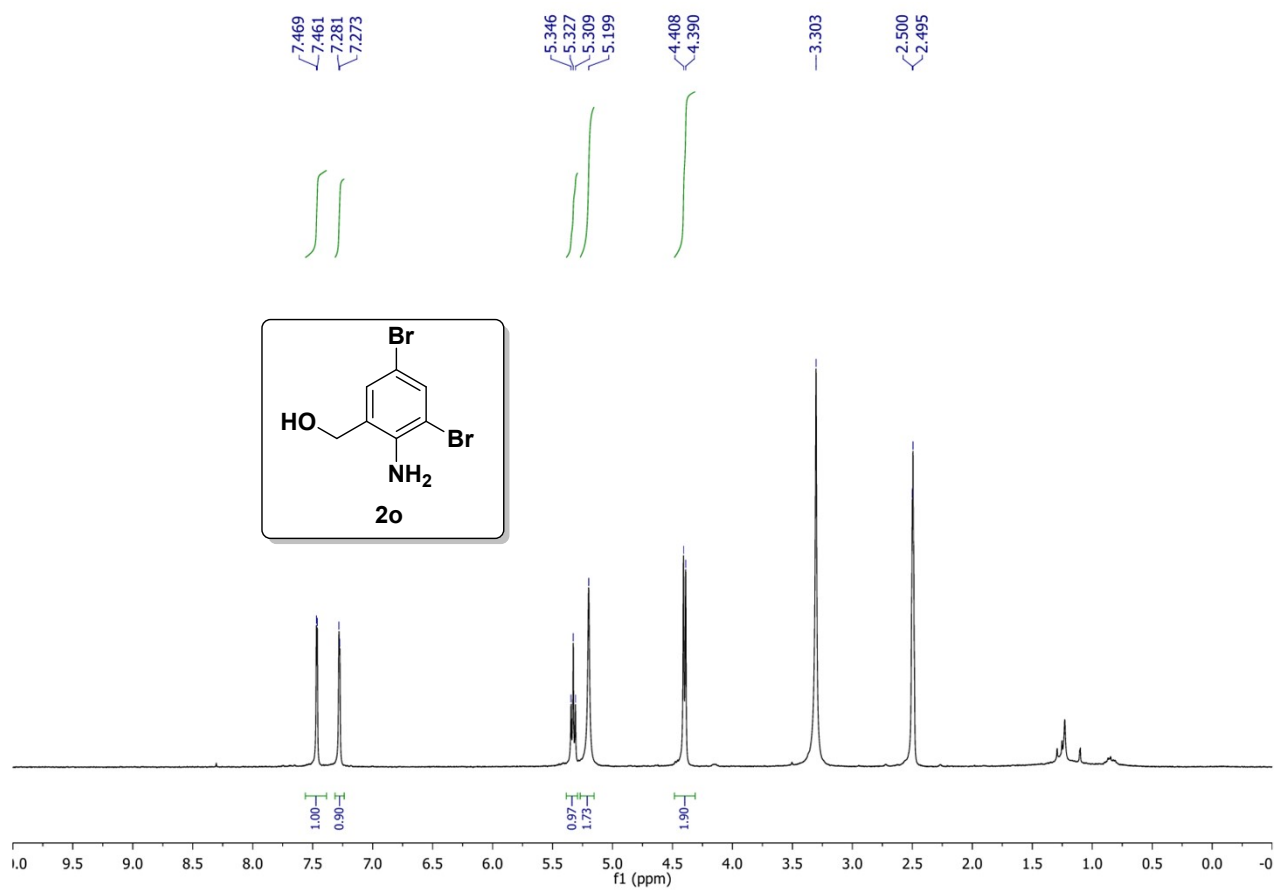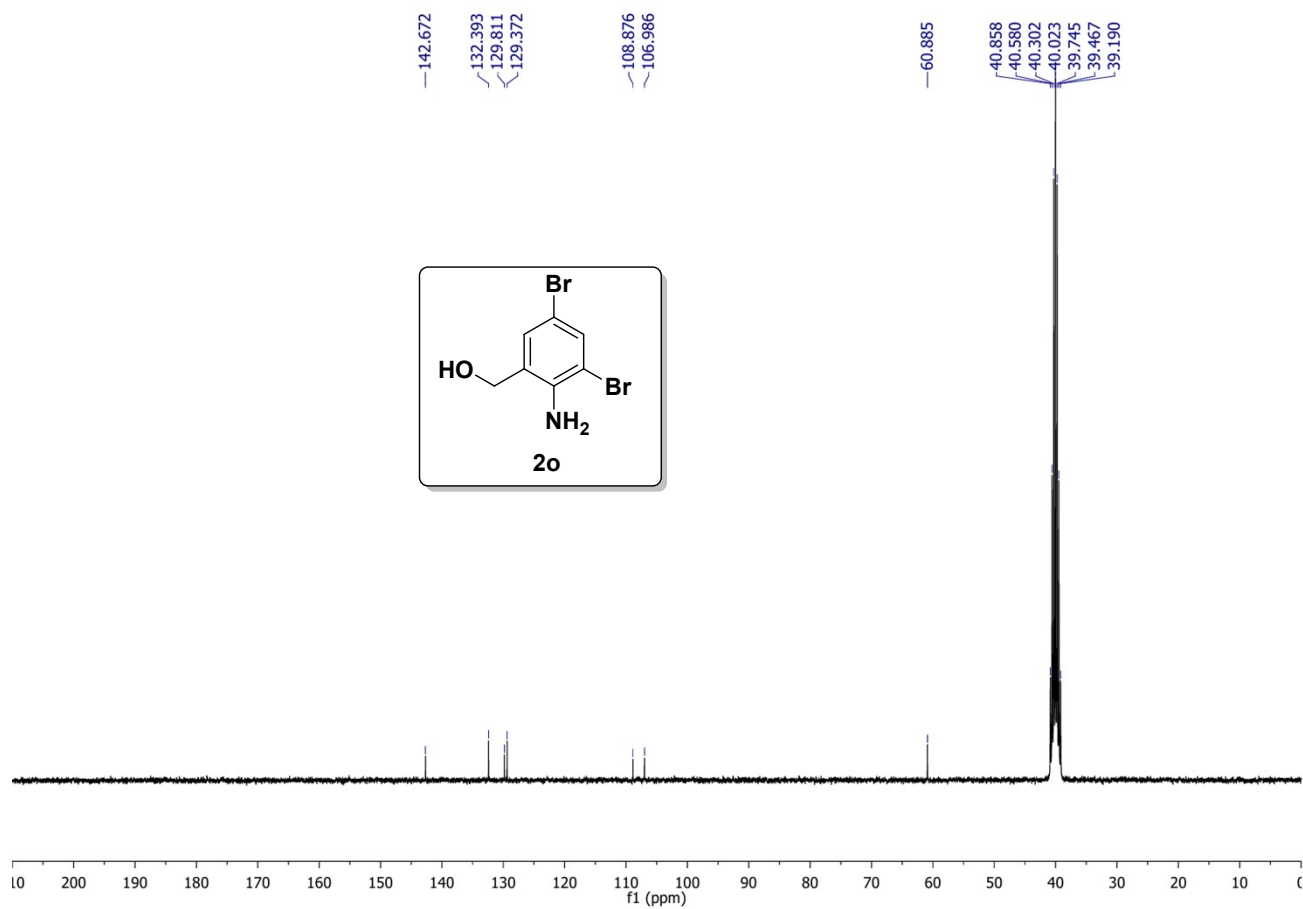

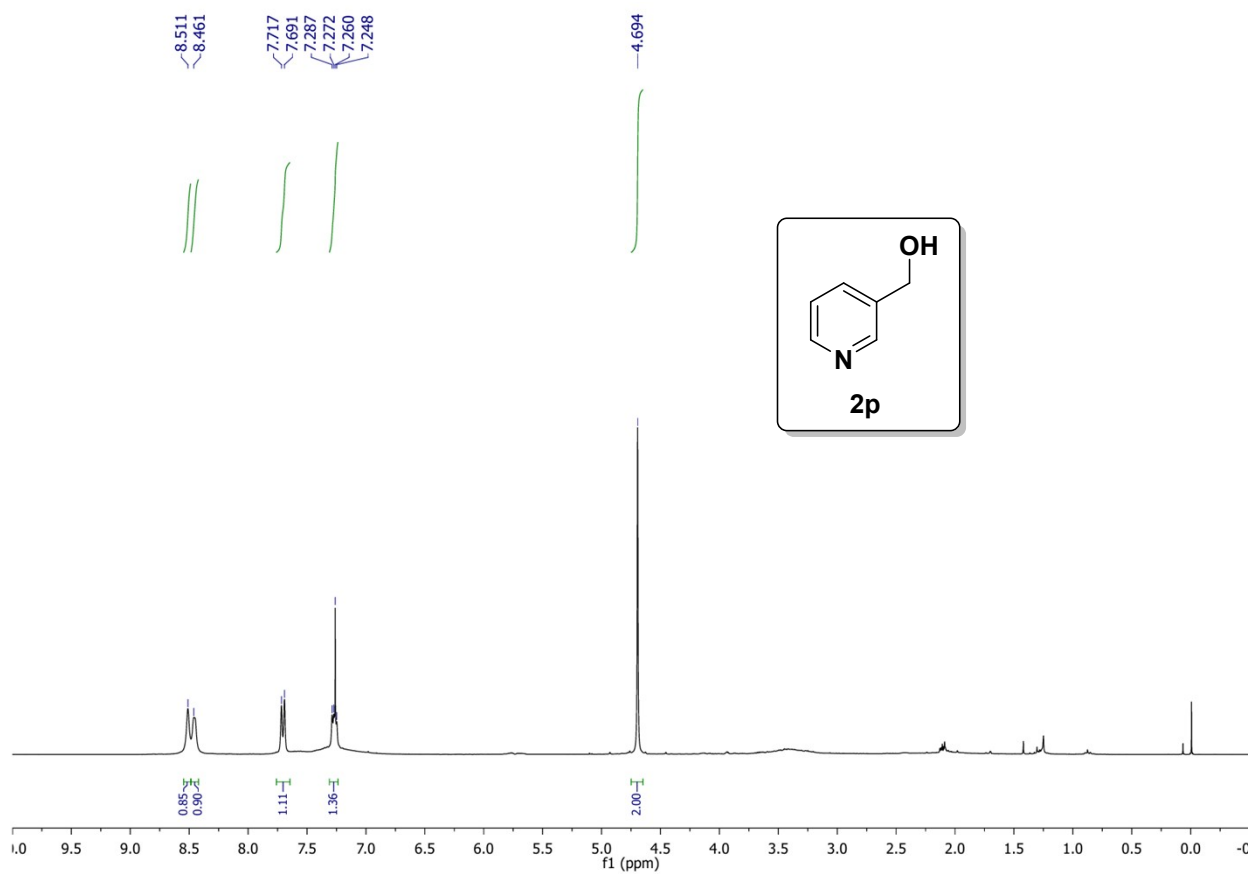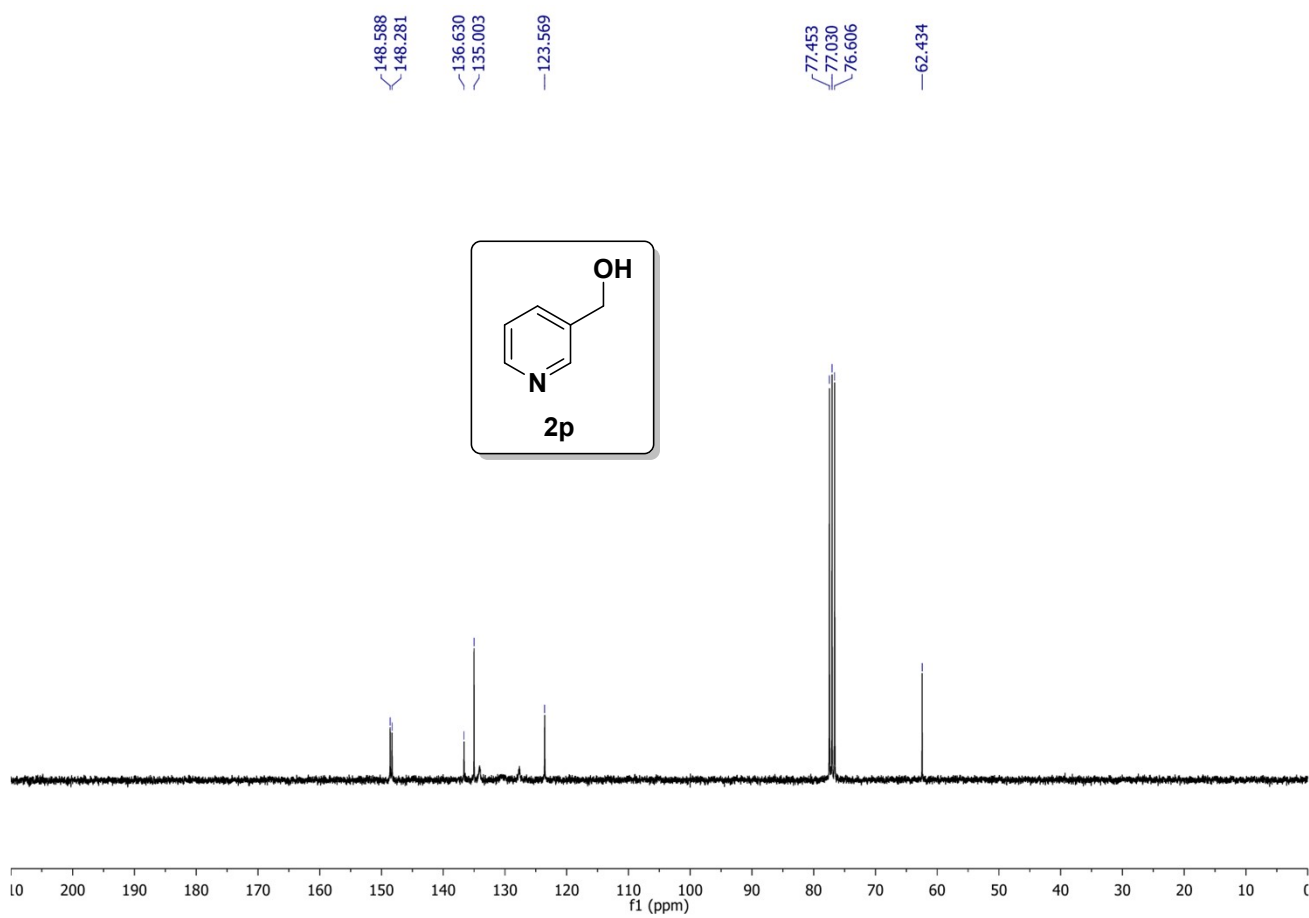

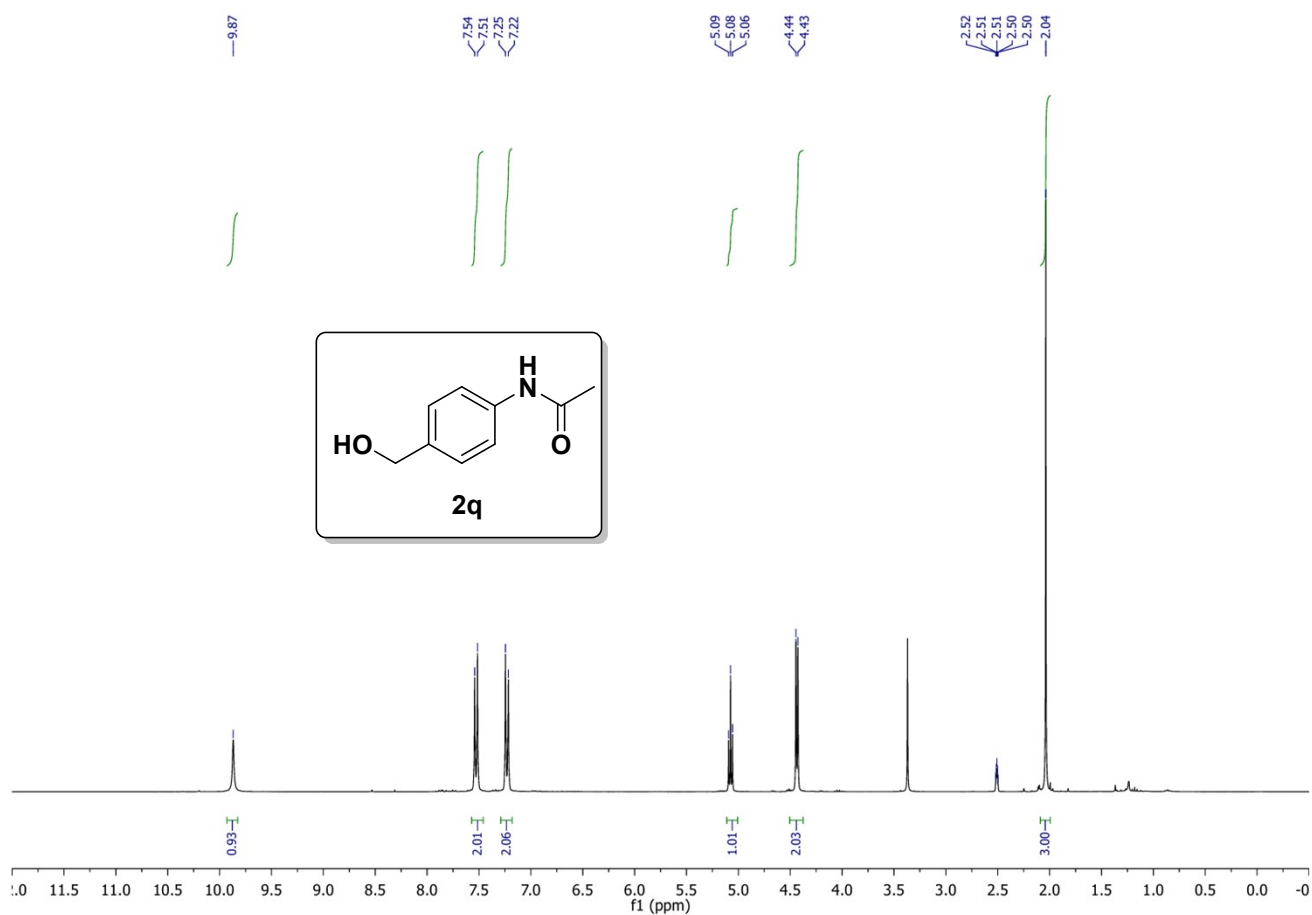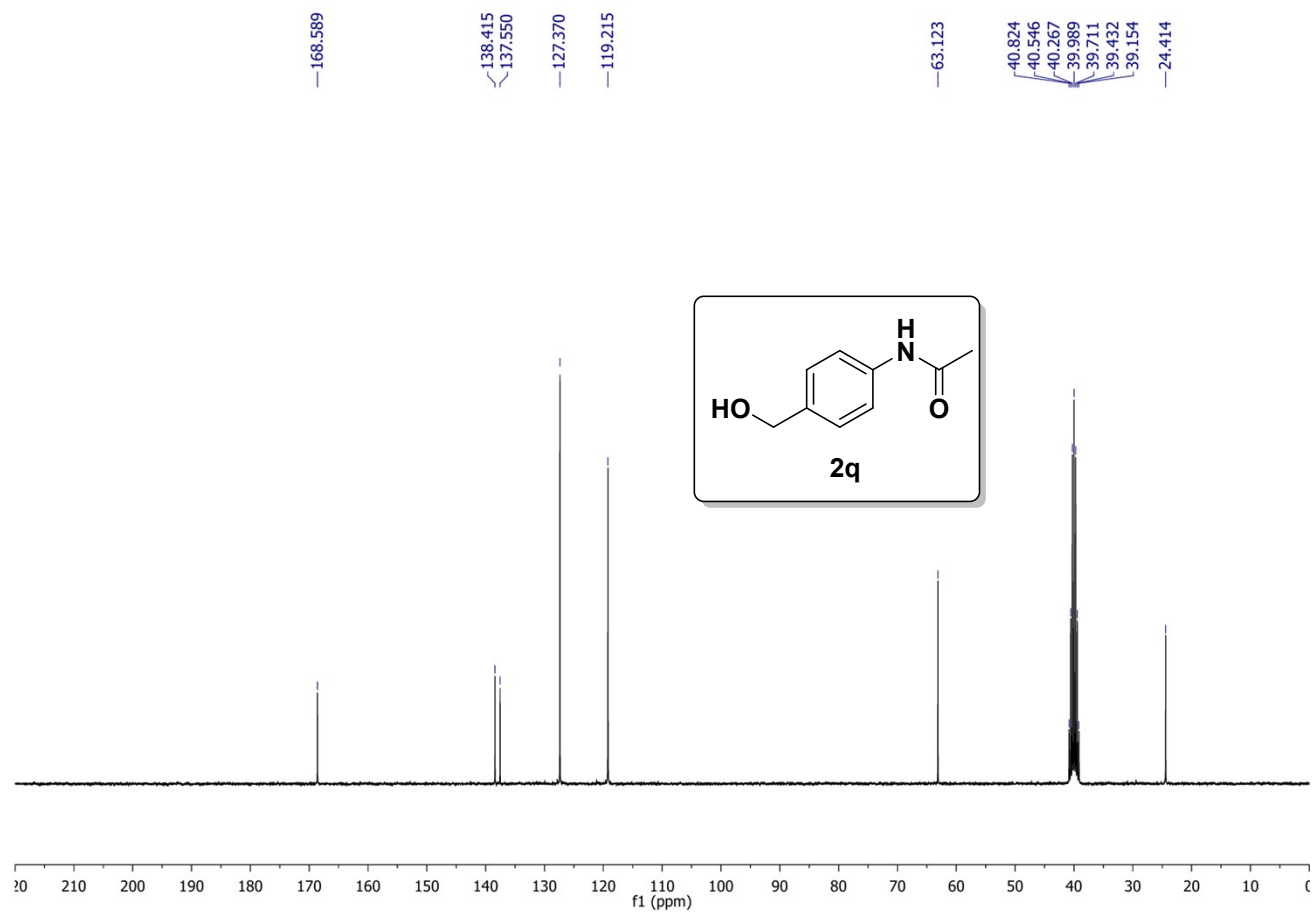



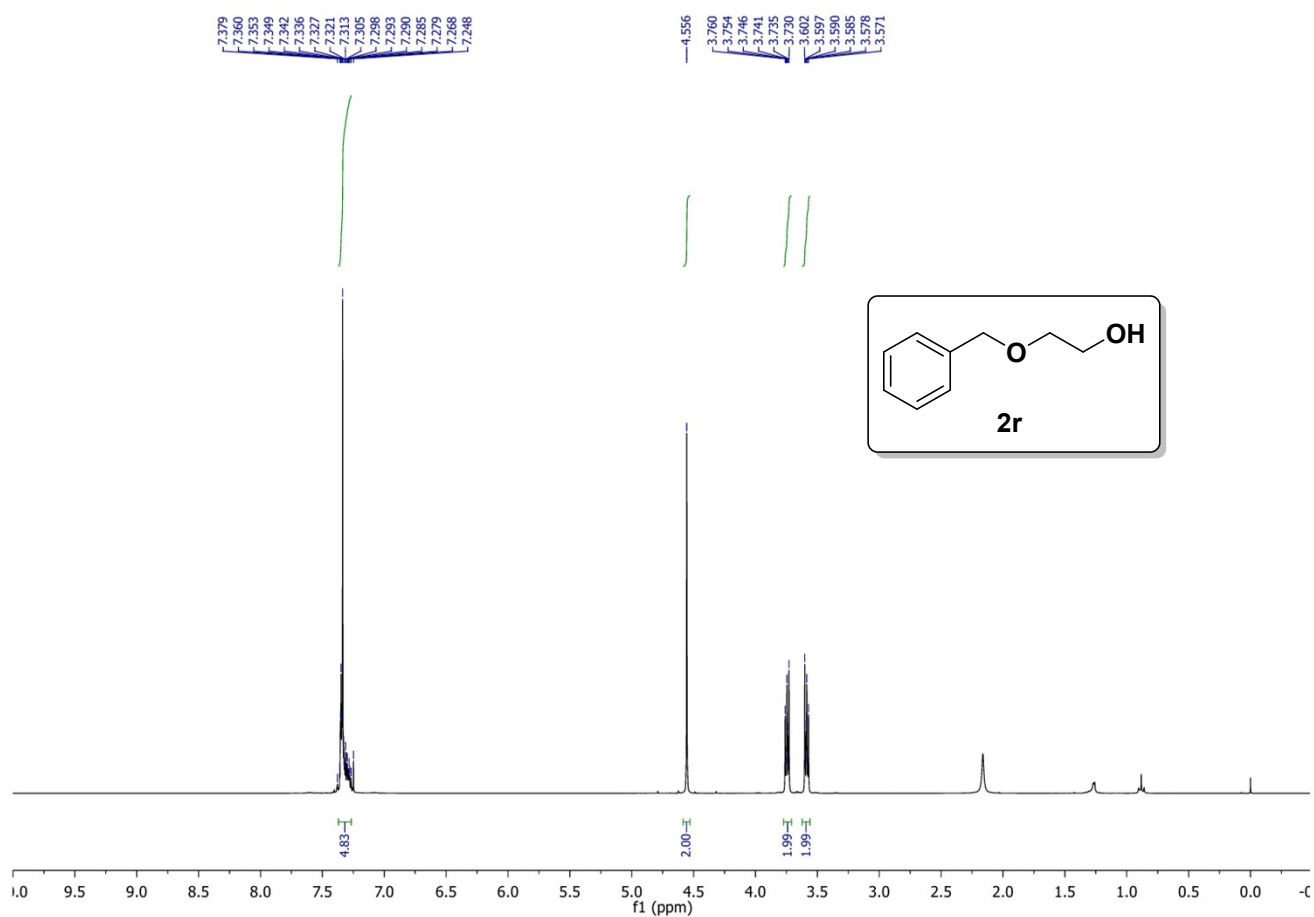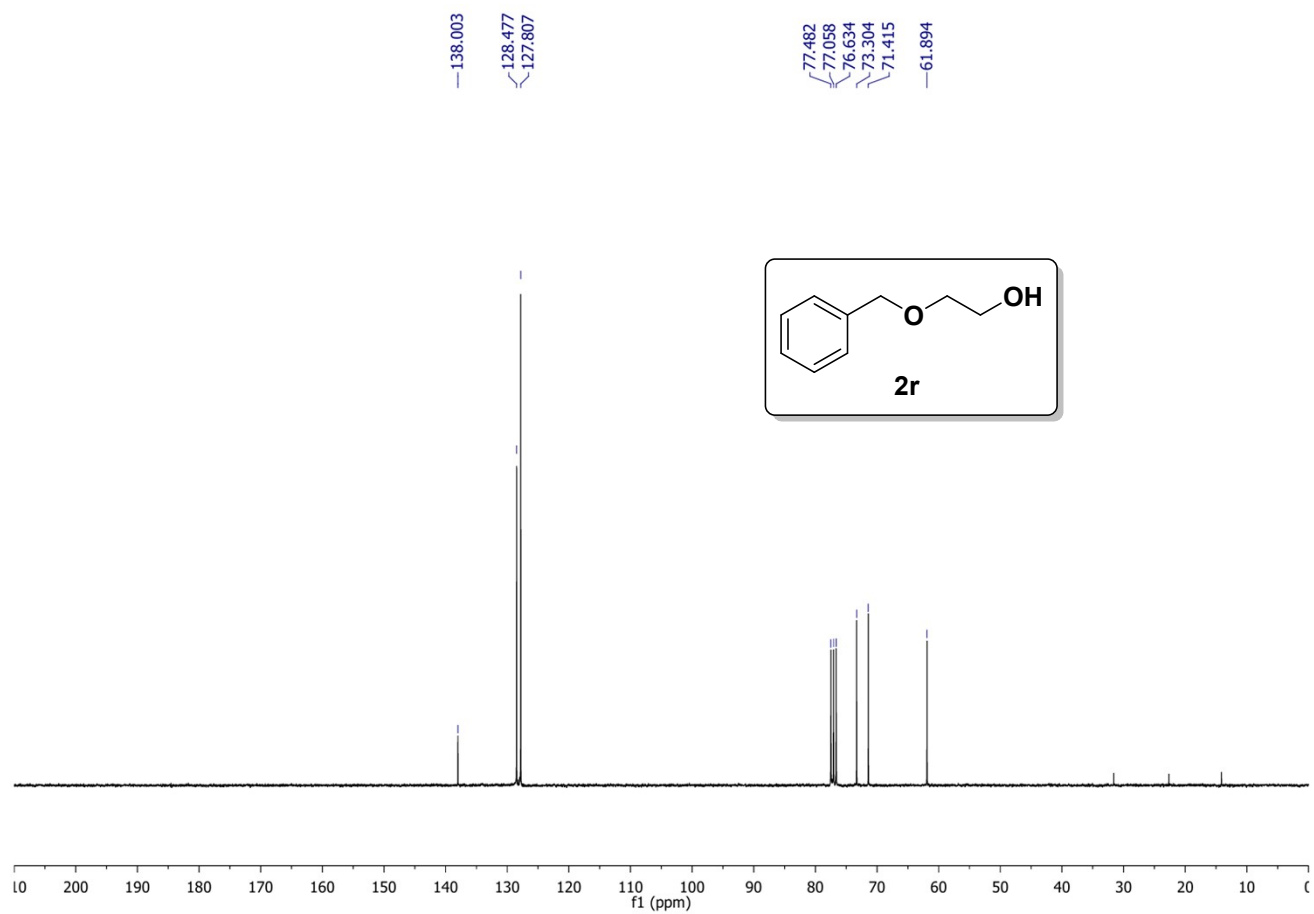

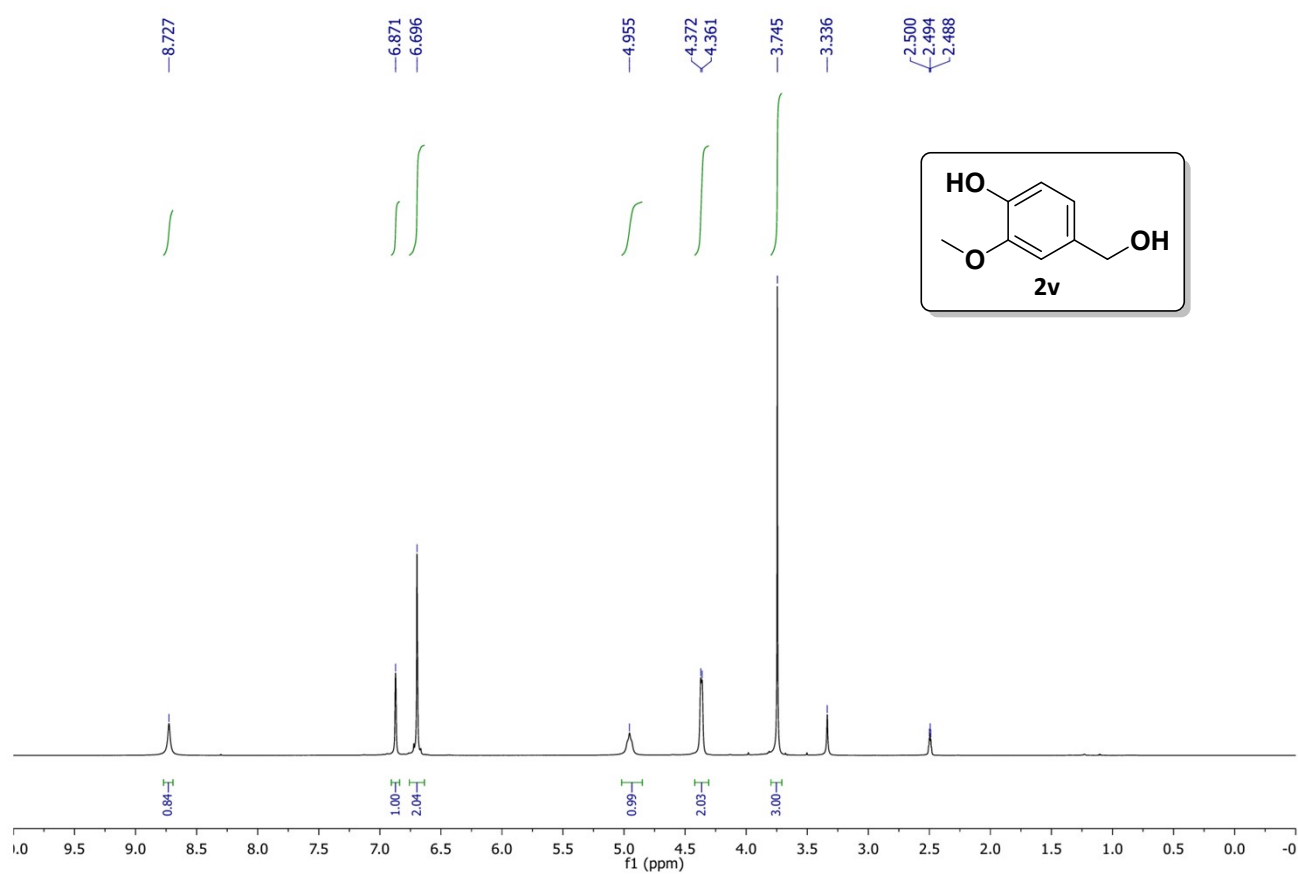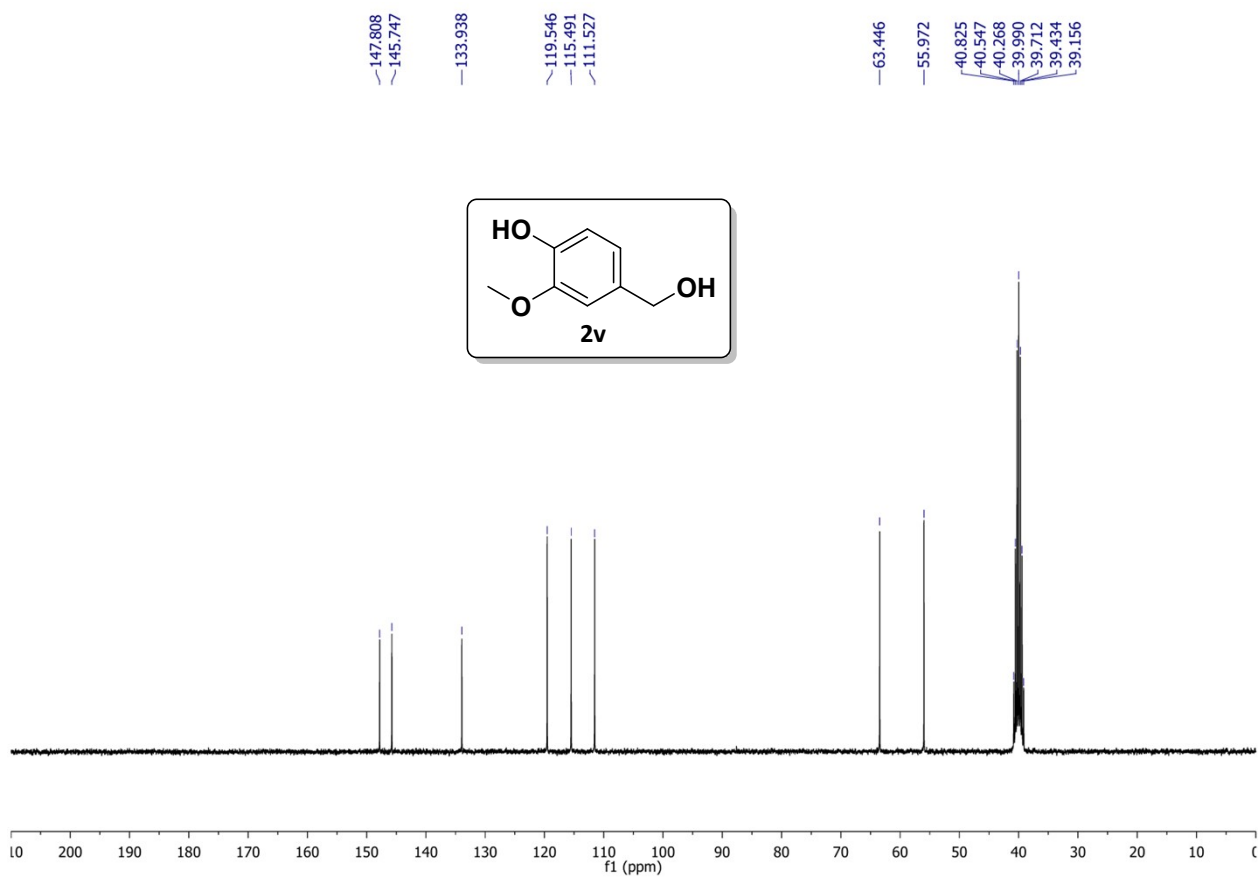

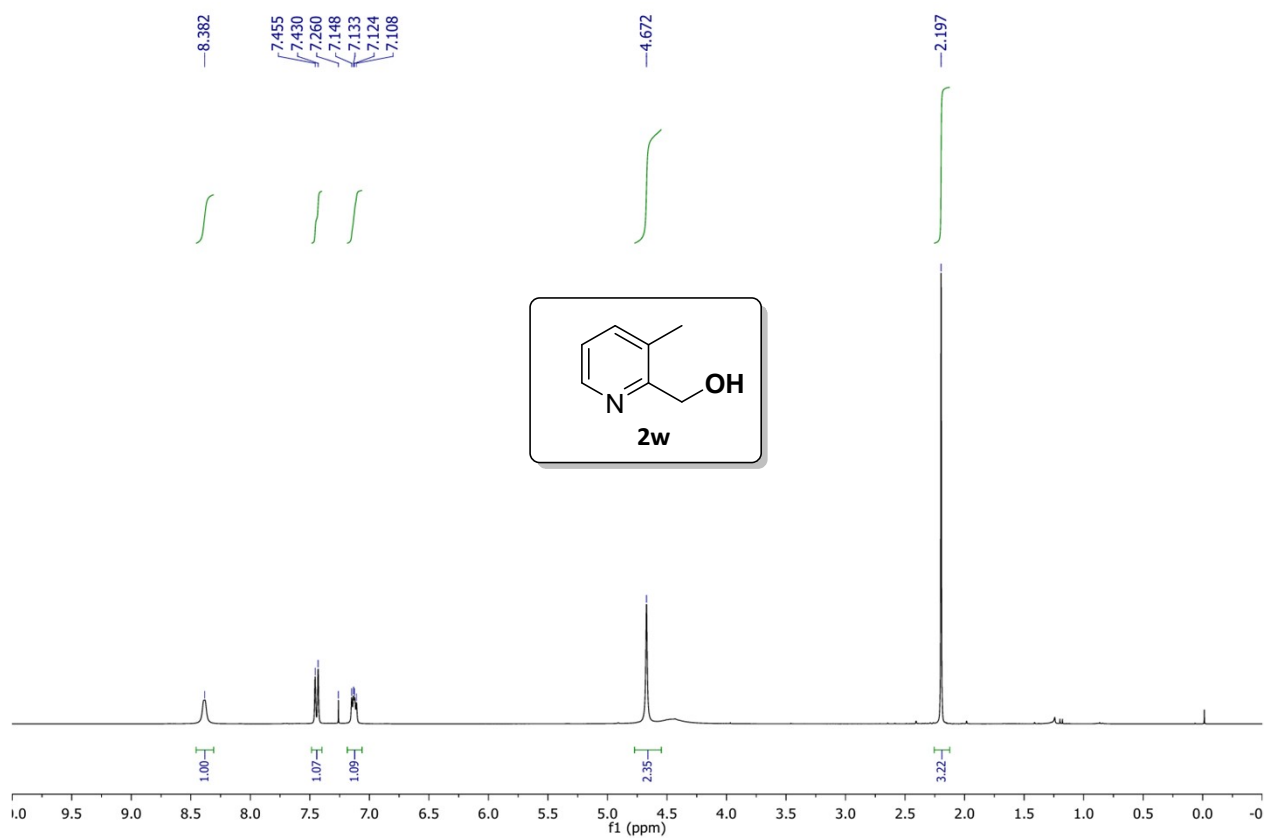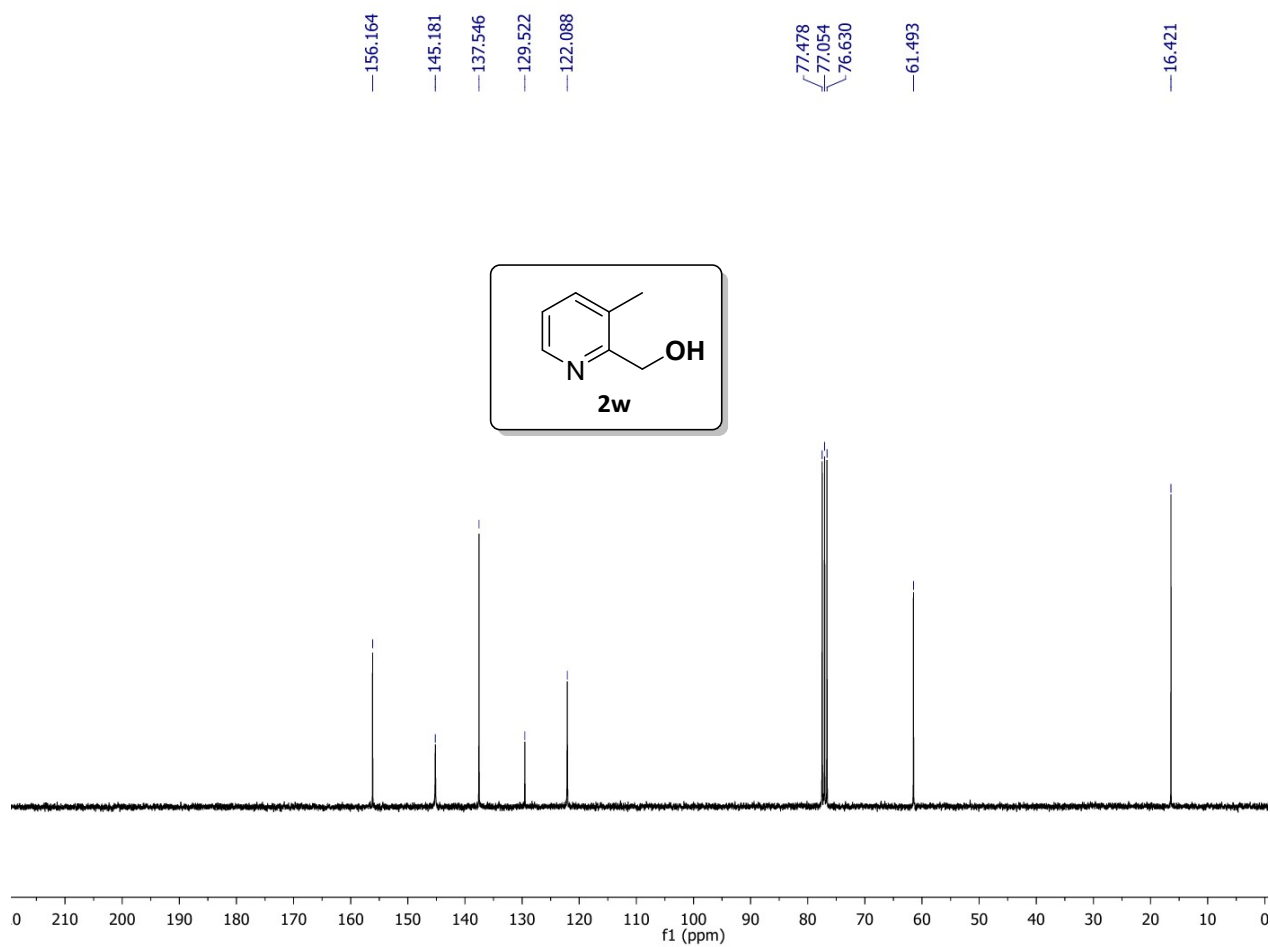

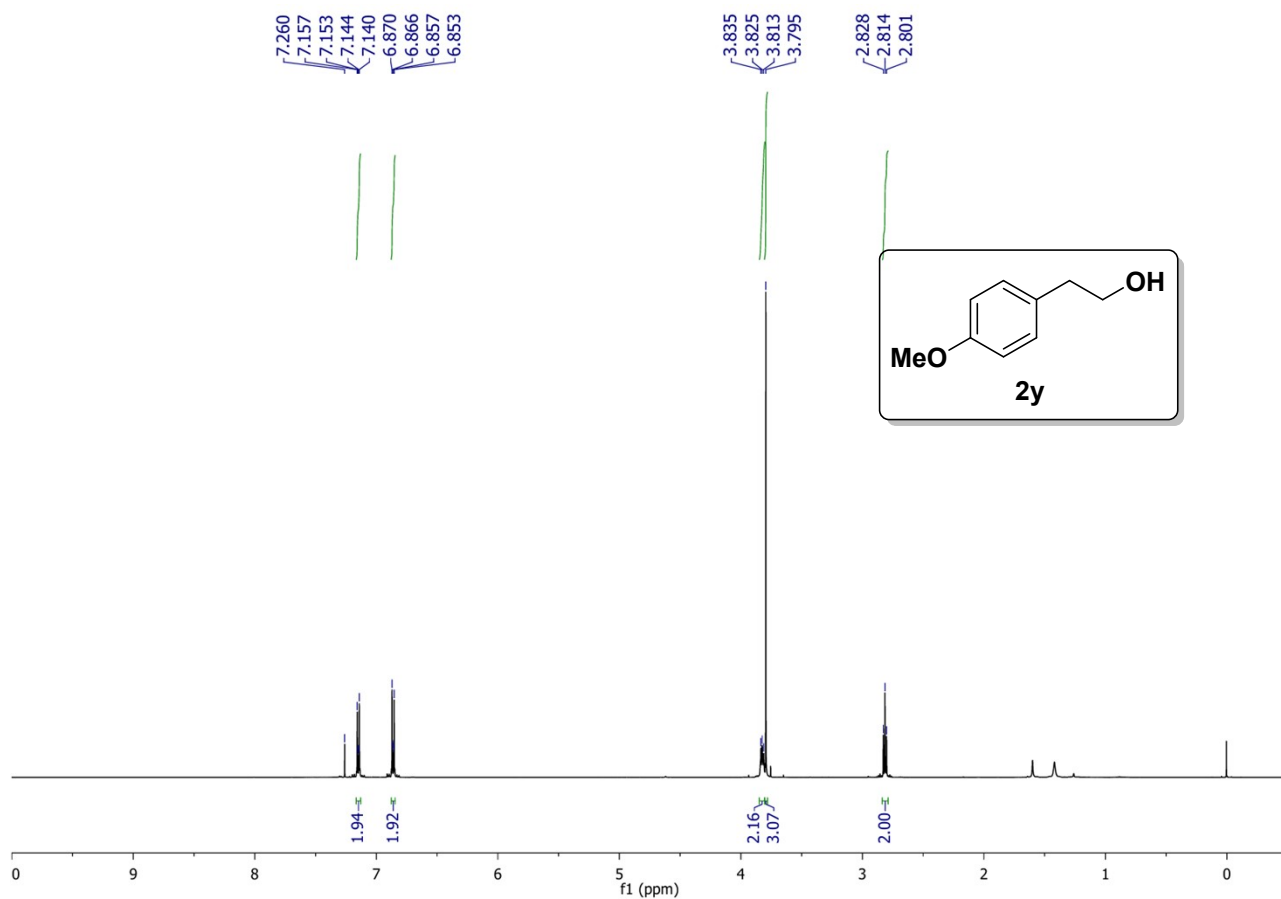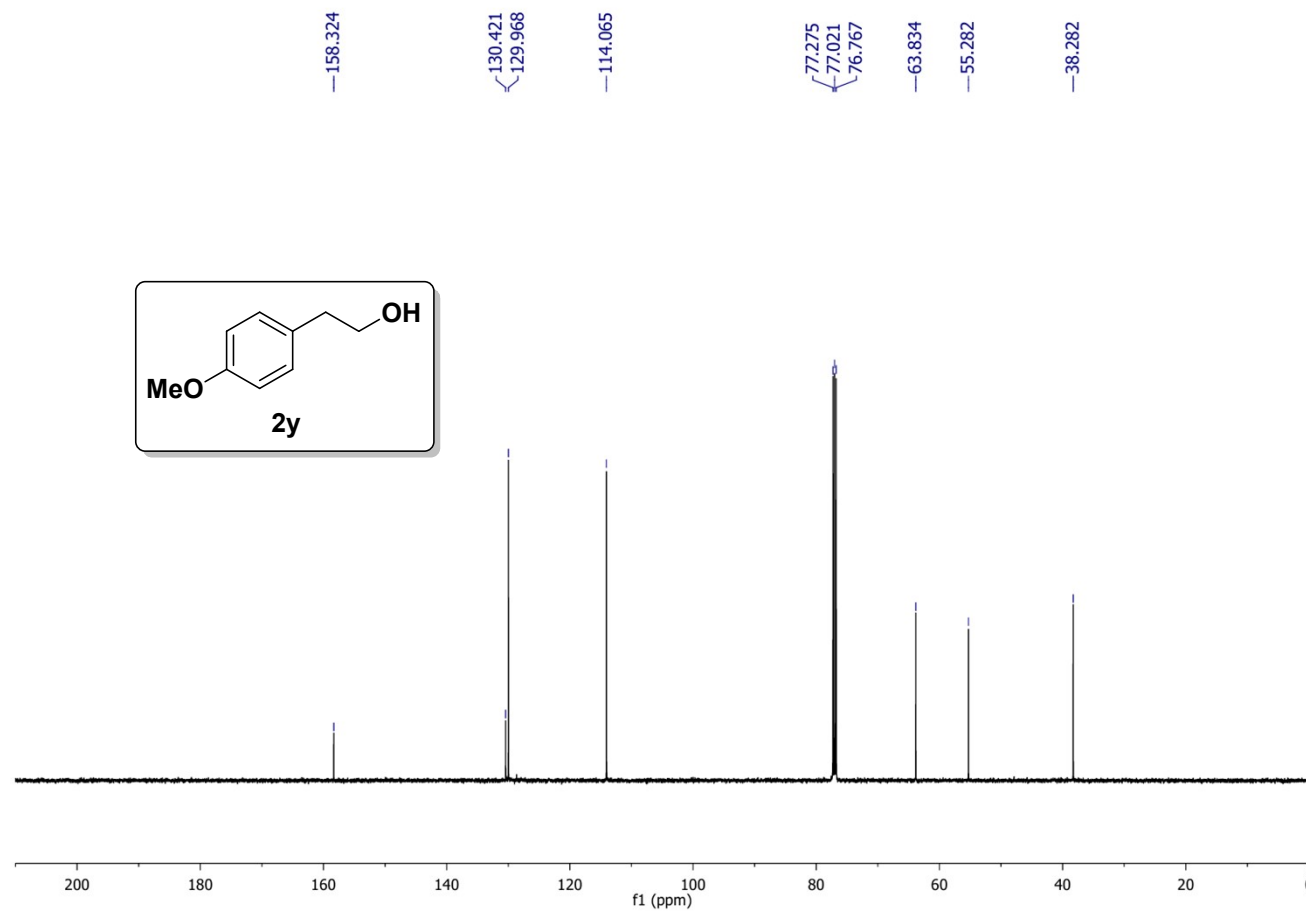

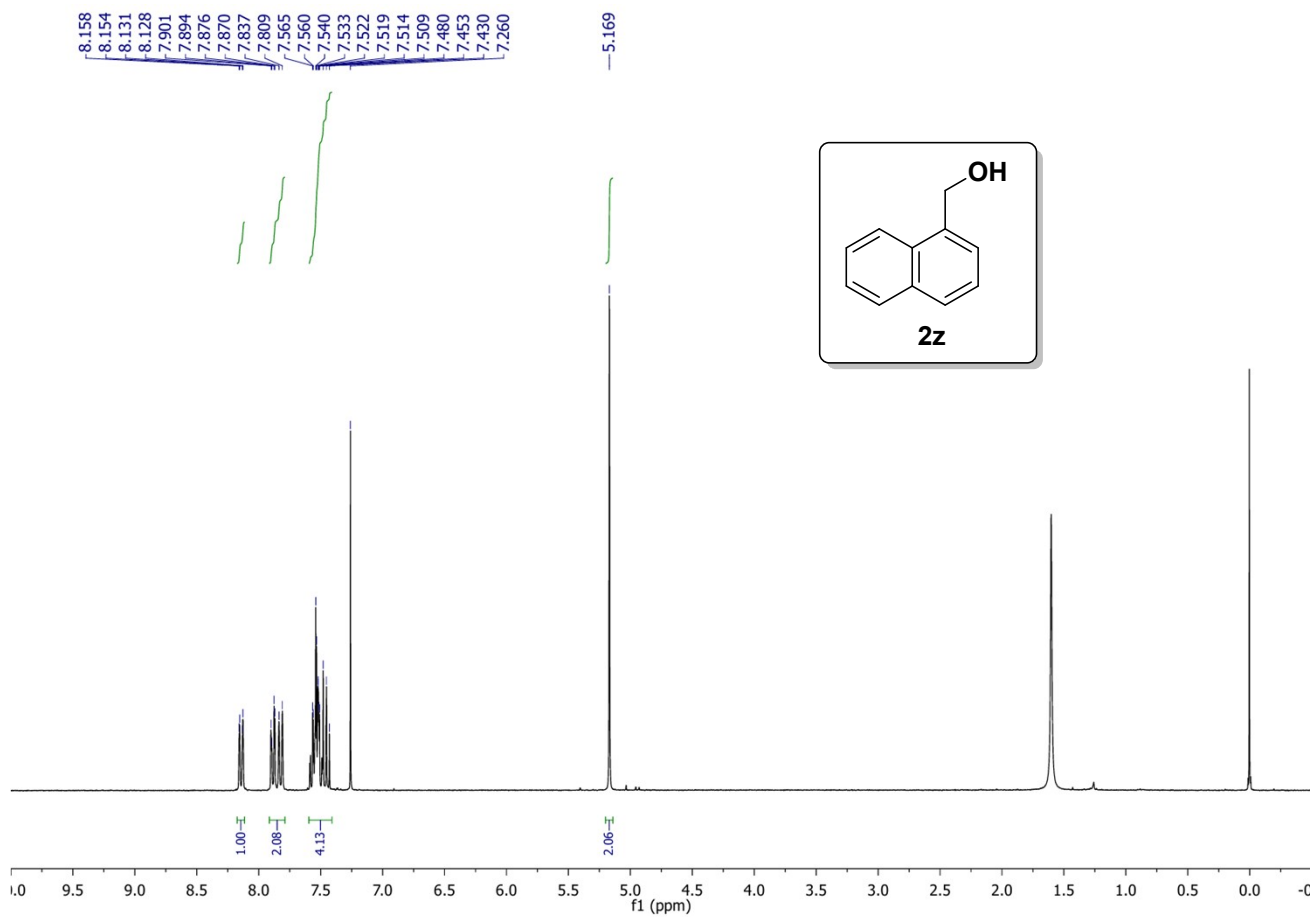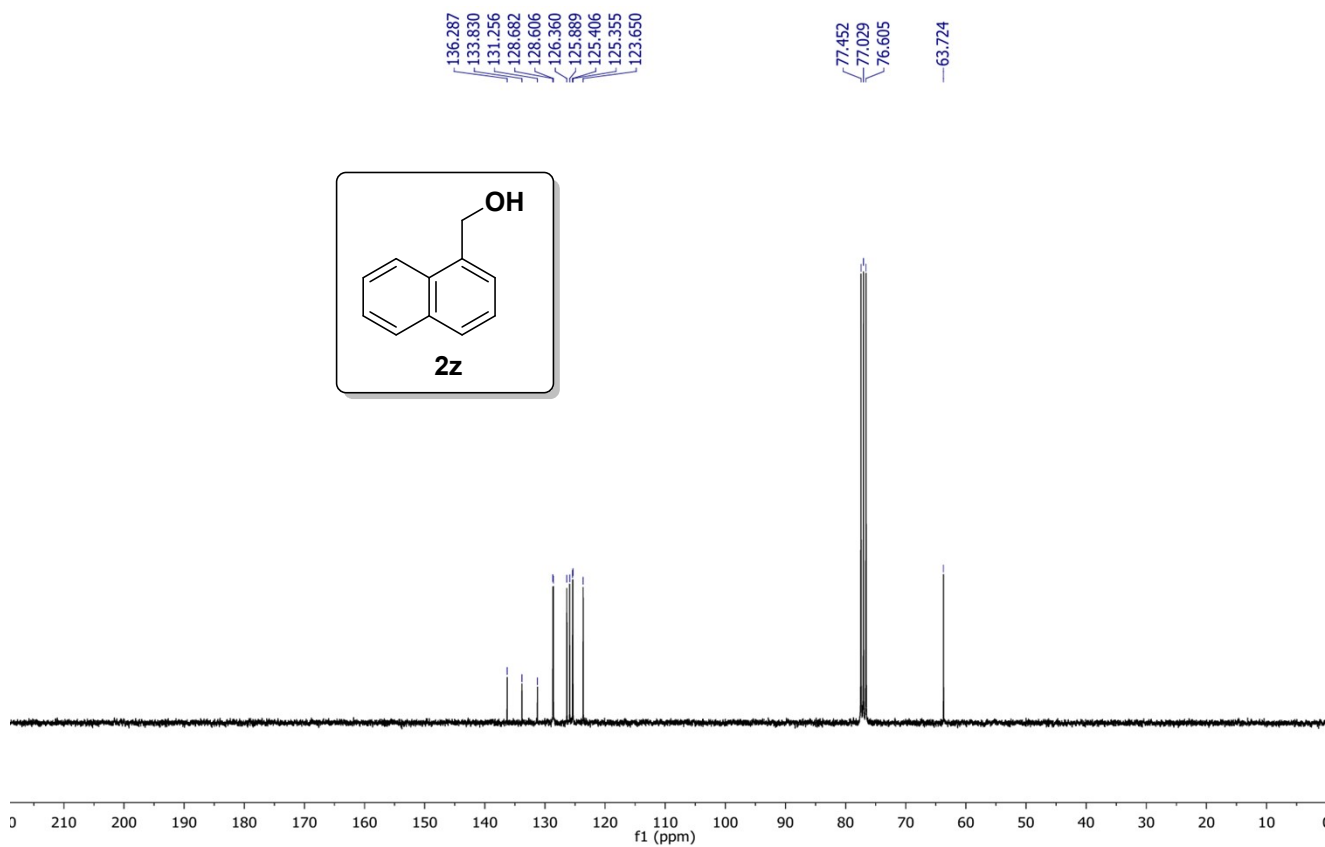

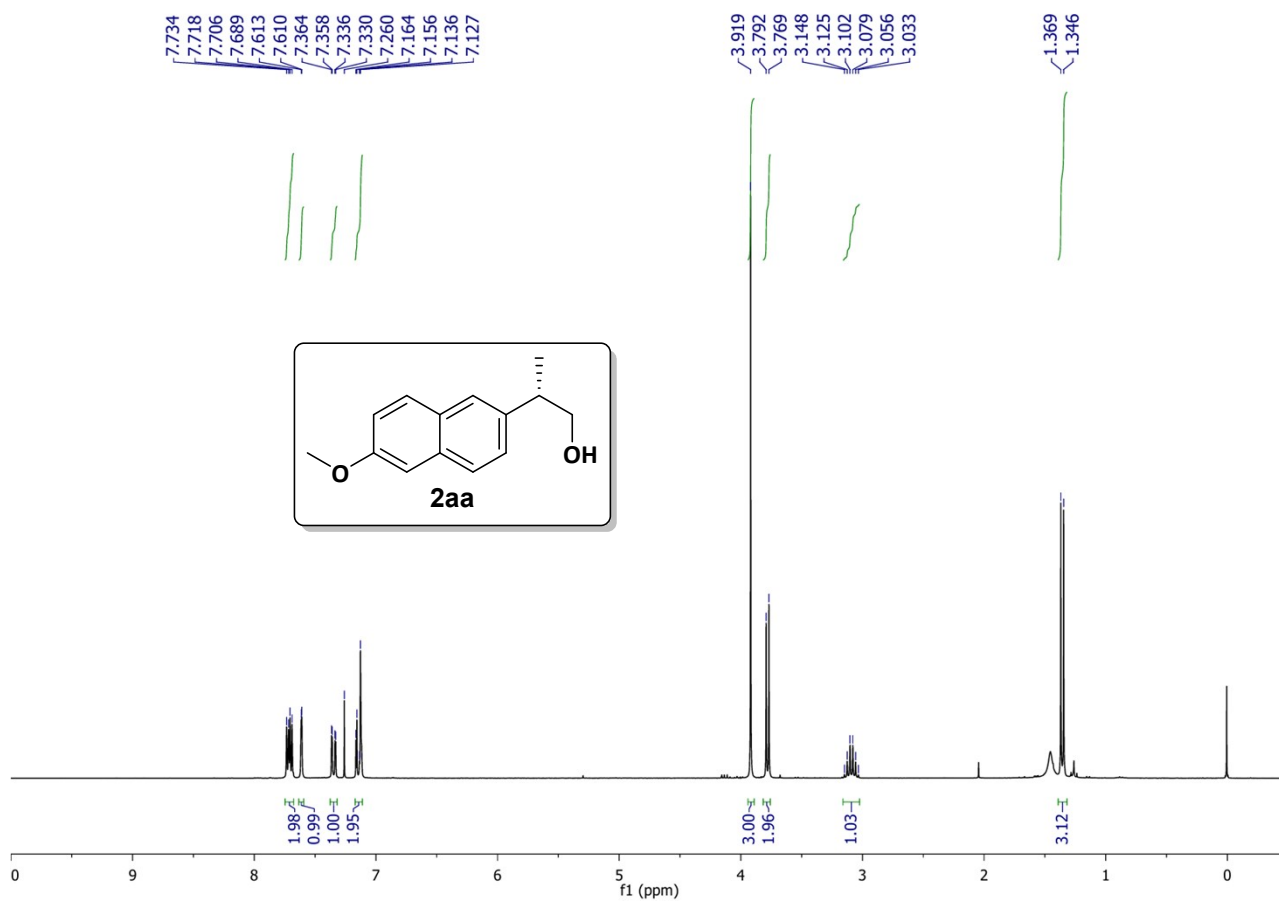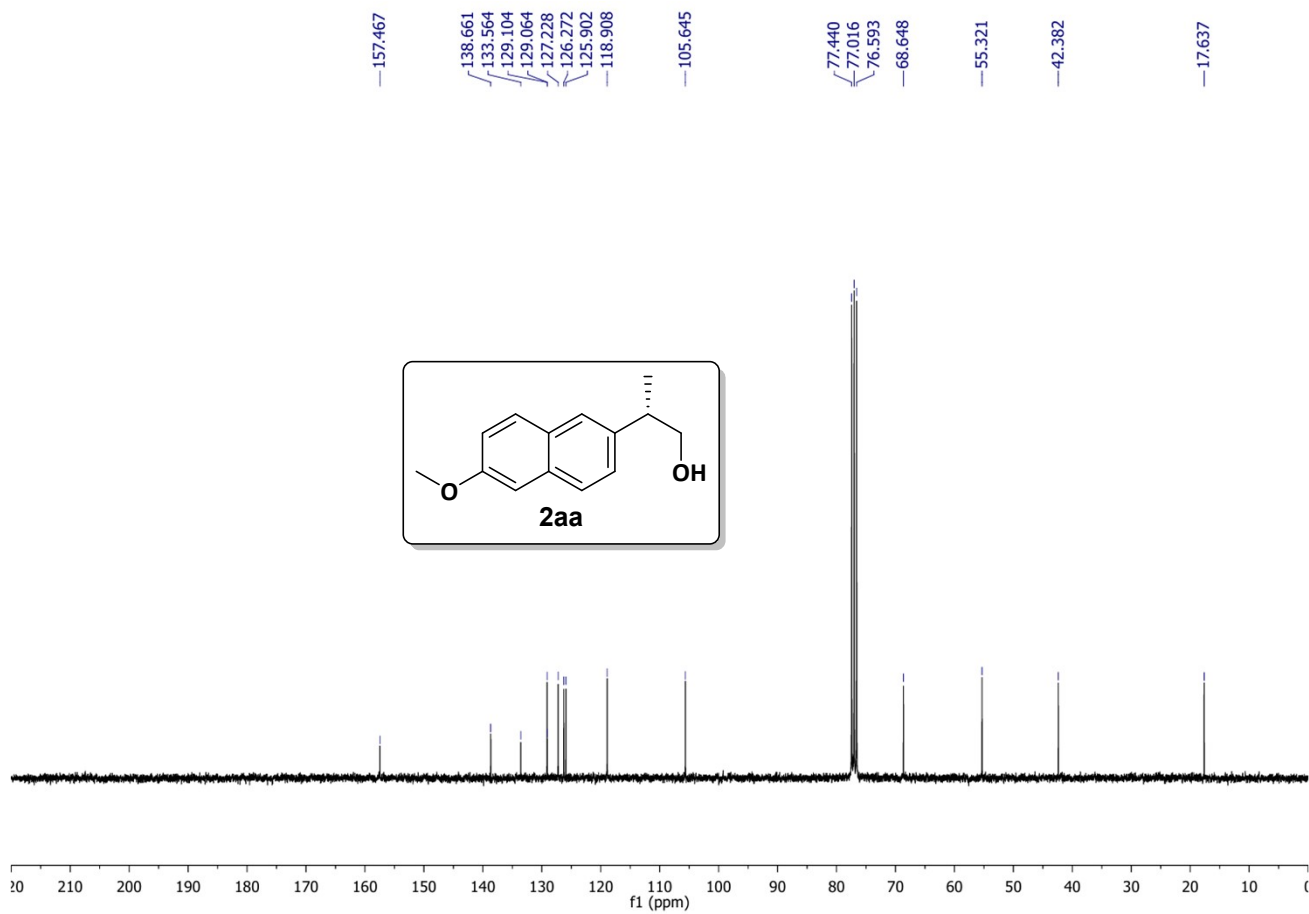

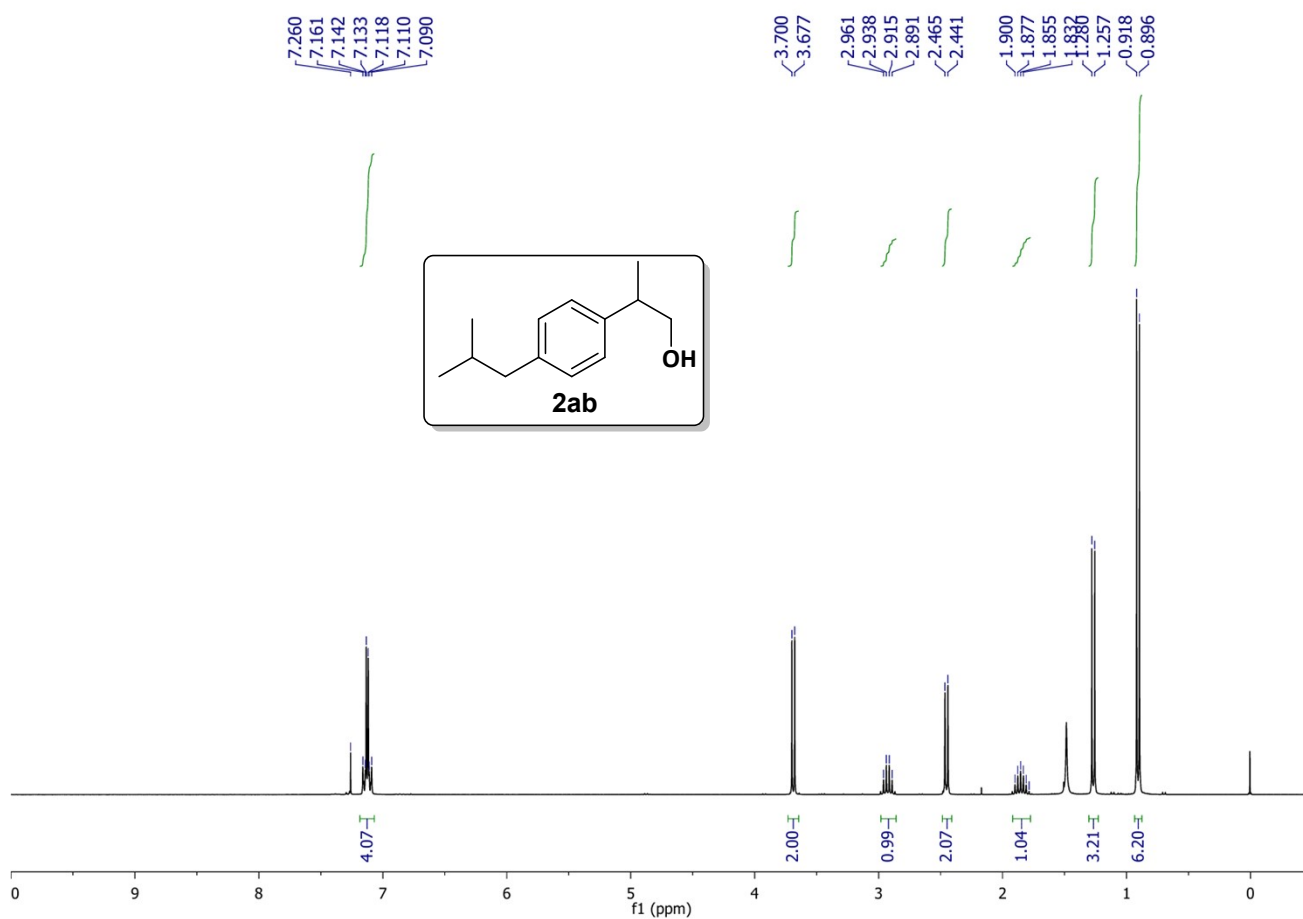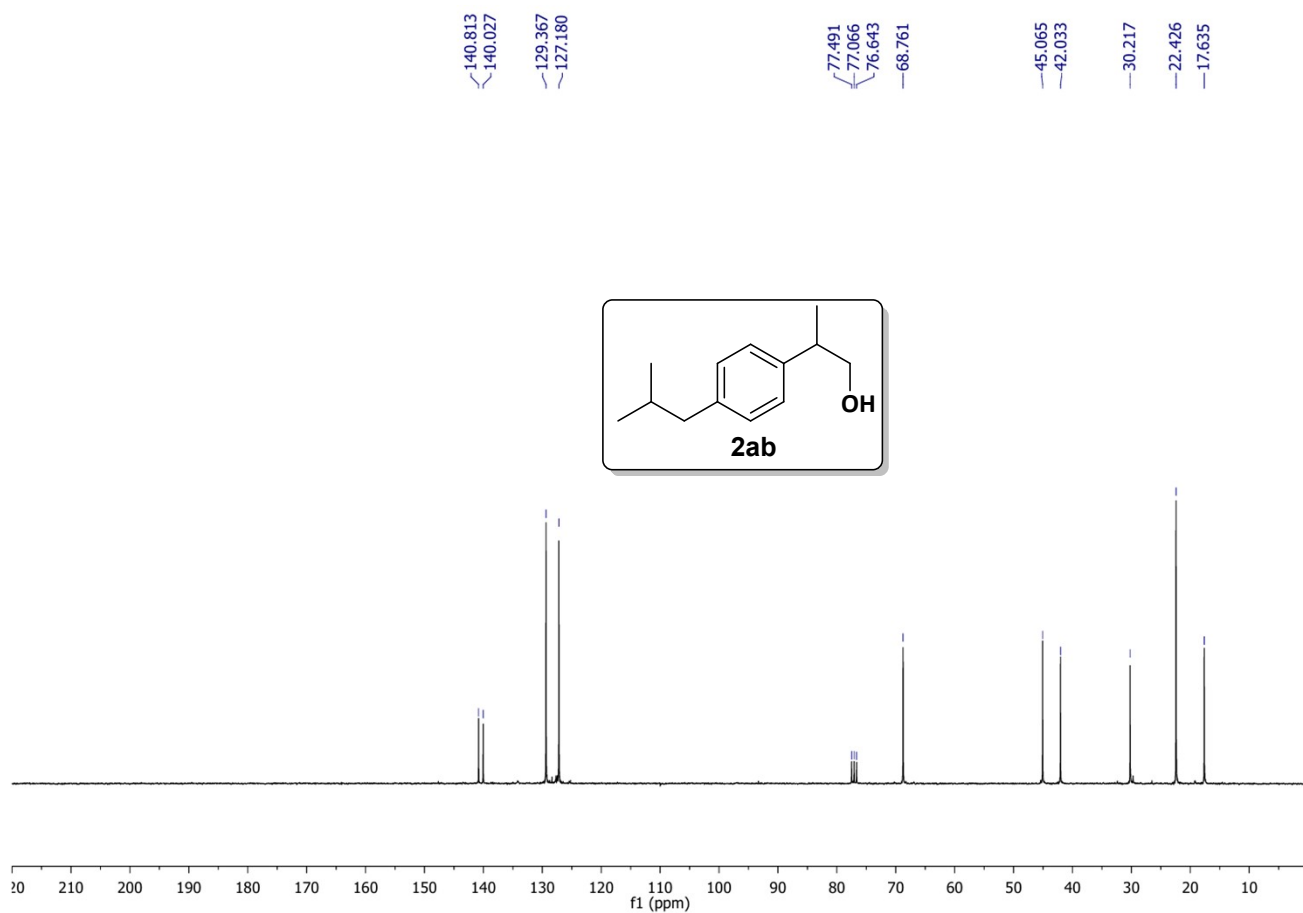

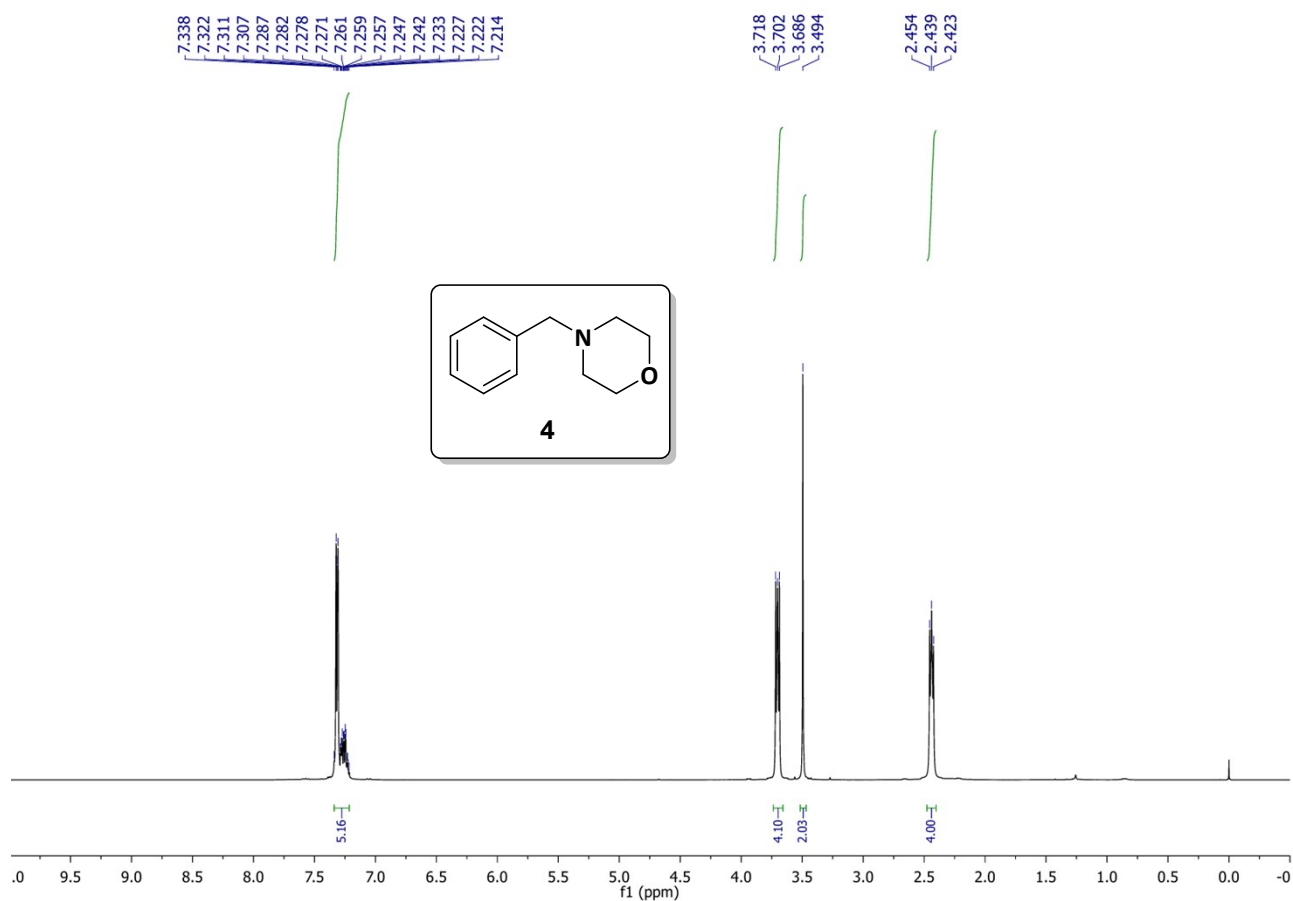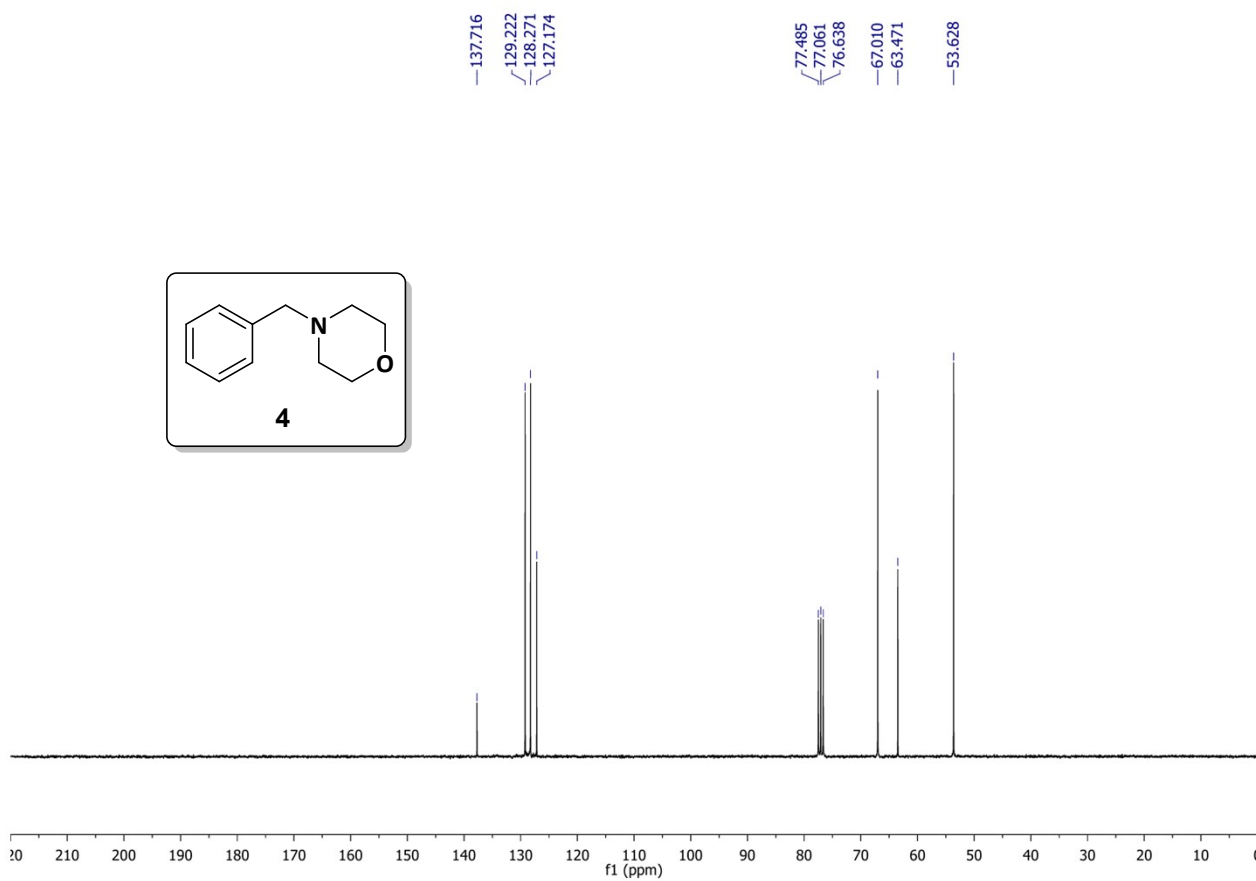

Supplement: d5cy01174d1.pdf [file d5cy01174d1.pdf]
